# Supplementary material for: Injectable biodegradable polymeric system for preserving the active form and delayed-release of camptothecin anticancer drugs
Source: Royal Society of Chemistry journal article supplement (doi:10.1039/c1ra00366f), 2011-10-27

## Supporting Information

### **Injectable Biodegradable Polymeric System for Preserving the Active form and Delayed-Release of Camptothecin Anticancer Drugs**

**Olcay Mert, Güneş Esendağlı, A. Lale Doğan, Ayhan S. Demir\***

|                                                |           |
|------------------------------------------------|-----------|
| <b>Tables and Figures.....</b>                 | <b>2</b>  |
| <b>Copy of HPLC spectra .....</b>              | <b>7</b>  |
| <b>Copy of <sup>1</sup>H NMR spectra .....</b> | <b>61</b> |

Table 1 Lactone Conversion of free CPT via FL

| <b>Time<br/>(min)</b> | <b>I(<math>\lambda_1</math>)</b> | <b>I(<math>\lambda_2</math>)</b> | <b>R</b> | <b>R<sub>L</sub></b> | <b>R<sub>C</sub></b> | <b>I<sub>L</sub>(<math>\lambda_2</math>)</b> | <b>I<sub>C</sub>(<math>\lambda_2</math>)</b> | <b>L %</b> | <b>C %</b> |
|-----------------------|----------------------------------|----------------------------------|----------|----------------------|----------------------|----------------------------------------------|----------------------------------------------|------------|------------|
| 0                     | 206                              | 60                               | 3.43     | 3.43                 | 2.18                 | 60                                           | 264                                          | 99.91      | 0.09       |
| 20                    | 269                              | 92                               | 2.92     | 3.43                 | 2.18                 | 60                                           | 264                                          | 86.40      | 13.60      |
| 40                    | 324                              | 121                              | 2.69     | 3.43                 | 2.18                 | 60                                           | 264                                          | 75.13      | 24.87      |
| 60                    | 373                              | 145                              | 2.57     | 3.43                 | 2.18                 | 60                                           | 264                                          | 66.53      | 33.47      |
| 80                    | 418                              | 168                              | 2.50     | 3.43                 | 2.18                 | 60                                           | 264                                          | 59.77      | 40.23      |
| 100                   | 454                              | 186                              | 2.45     | 3.43                 | 2.18                 | 60                                           | 264                                          | 54.50      | 45.50      |
| 120                   | 486                              | 202                              | 2.41     | 3.43                 | 2.18                 | 60                                           | 264                                          | 49.26      | 50.74      |
| 140                   | 511                              | 216                              | 2.37     | 3.43                 | 2.18                 | 60                                           | 264                                          | 44.28      | 55.72      |
| 160                   | 533                              | 226                              | 2.36     | 3.43                 | 2.18                 | 60                                           | 264                                          | 42.28      | 57.72      |
| 180                   | 552                              | 237                              | 2.33     | 3.43                 | 2.18                 | 60                                           | 264                                          | 38.21      | 61.79      |
| 200                   | 567                              | 246                              | 2.31     | 3.43                 | 2.18                 | 60                                           | 264                                          | 33.72      | 66.28      |
| 220                   | 578                              | 251                              | 2.31     | 3.43                 | 2.18                 | 60                                           | 264                                          | 32.91      | 67.09      |
| 240                   | 586                              | 255                              | 2.30     | 3.43                 | 2.18                 | 60                                           | 264                                          | 32.35      | 67.65      |
| 260                   | 594                              | 259                              | 2.30     | 3.43                 | 2.18                 | 60                                           | 264                                          | 31.42      | 68.58      |
| 280                   | 599                              | 261                              | 2.29     | 3.43                 | 2.18                 | 60                                           | 264                                          | 30.45      | 69.55      |
| 300                   | 601                              | 263                              | 2.29     | 3.43                 | 2.18                 | 60                                           | 264                                          | 29.70      | 70.30      |
| 310                   | 601                              | 264                              | 2.28     | 3.43                 | 2.18                 | 60                                           | 264                                          | 26.91      | 73.09      |

Table 2 Lactone Conversion of free TPT via FL

| <b>Time<br/>(min)</b> | <b>I(<math>\lambda_1</math>)</b> | <b>I(<math>\lambda_2</math>)</b> | <b>R</b> | <b>R<sub>L</sub></b> | <b>R<sub>C</sub></b> | <b>I<sub>L</sub>(<math>\lambda_2</math>)</b> | <b>I<sub>C</sub>(<math>\lambda_2</math>)</b> | <b>L %</b> | <b>C %</b> |
|-----------------------|----------------------------------|----------------------------------|----------|----------------------|----------------------|----------------------------------------------|----------------------------------------------|------------|------------|
| 0                     | 560                              | 115                              | 4.87     | 4.86                 | 5.41                 | 115                                          | 79                                           | 97.77      | 2.23       |
| 20                    | 549                              | 112                              | 4.91     | 4.86                 | 5.41                 | 115                                          | 79                                           | 87.14      | 12.86      |
| 40                    | 535                              | 109                              | 4.91     | 4.86                 | 5.41                 | 115                                          | 79                                           | 86.71      | 13.29      |
| 60                    | 526                              | 106                              | 4.95     | 4.86                 | 5.41                 | 115                                          | 79                                           | 78.59      | 21.41      |
| 80                    | 517                              | 104                              | 4.95     | 4.86                 | 5.41                 | 115                                          | 79                                           | 77.21      | 22.79      |
| 100                   | 506                              | 101                              | 4.98     | 4.86                 | 5.41                 | 115                                          | 79                                           | 70.24      | 29.76      |
| 120                   | 498                              | 100                              | 4.99     | 4.86                 | 5.41                 | 115                                          | 79                                           | 69.63      | 30.37      |
| 140                   | 491                              | 98                               | 5.02     | 4.86                 | 5.41                 | 115                                          | 79                                           | 62.17      | 37.83      |
| 160                   | 484                              | 96                               | 5.02     | 4.86                 | 5.41                 | 115                                          | 79                                           | 61.90      | 38.10      |
| 180                   | 478                              | 95                               | 5.04     | 4.86                 | 5.41                 | 115                                          | 79                                           | 57.91      | 42.09      |
| 200                   | 471                              | 93                               | 5.07     | 4.86                 | 5.41                 | 115                                          | 79                                           | 52.47      | 47.53      |
| 220                   | 464                              | 91                               | 5.09     | 4.86                 | 5.41                 | 115                                          | 79                                           | 49.72      | 50.28      |
| 240                   | 455                              | 89                               | 5.10     | 4.86                 | 5.41                 | 115                                          | 79                                           | 47.39      | 52.61      |
| 260                   | 445                              | 87                               | 5.13     | 4.86                 | 5.41                 | 115                                          | 79                                           | 41.24      | 58.76      |
| 280                   | 432                              | 84                               | 5.14     | 4.86                 | 5.41                 | 115                                          | 79                                           | 40.38      | 59.62      |
| 300                   | 419                              | 81                               | 5.17     | 4.86                 | 5.41                 | 115                                          | 79                                           | 33.95      | 66.05      |
| 310                   | 413                              | 79                               | 5.20     | 4.86                 | 5.41                 | 115                                          | 79                                           | 30.29      | 69.71      |

Table 3 CPT in gel, 0.015 % loading via FL

| <b>Time(min)</b> | <b>I(<math>\lambda_1</math>)</b> | <b>I(<math>\lambda_2</math>)</b> | <b>R</b> | <b>R<sub>L</sub></b> | <b>R<sub>C</sub></b> | <b>I<sub>L</sub>(<math>\lambda_2</math>)</b> | <b>I<sub>C</sub>(<math>\lambda_2</math>)</b> | <b>L %</b> | <b>C %</b> |
|------------------|----------------------------------|----------------------------------|----------|----------------------|----------------------|----------------------------------------------|----------------------------------------------|------------|------------|
| 0                | 138.60                           | 58.80                            | 2.36     | 2.39                 | 2.07                 | 58.80                                        | 121.00                                       | 94.73      | 5.27       |
| 85               | 75.60                            | 31.96                            | 2.37     | 2.39                 | 2.07                 | 31.96                                        | 71.00                                        | 96.40      | 3.60       |
| 175              | 226.40                           | 94.60                            | 2.39     | 2.39                 | 2.07                 | 94.60                                        | 194.00                                       | 100.49     | -0.49      |
| 260              | 185.60                           | 77.50                            | 2.39     | 2.39                 | 2.07                 | 77.50                                        | 165.00                                       | 100.70     | -0.70      |
| 310              | 307.39                           | 129.00                           | 2.38     | 2.39                 | 2.07                 | 129.00                                       | 277.00                                       | 98.95      | 1.05       |

Table 4 TPT in gel, 0.015 % loading via FL

| <b>Time(min)</b> | <b>I(<math>\lambda_1</math>)</b> | <b>I(<math>\lambda_2</math>)</b> | <b>R</b> | <b>R<sub>L</sub></b> | <b>R<sub>C</sub></b> | <b>I<sub>L</sub>(<math>\lambda_2</math>)</b> | <b>I<sub>C</sub>(<math>\lambda_2</math>)</b> | <b>L %</b> | <b>C %</b> |
|------------------|----------------------------------|----------------------------------|----------|----------------------|----------------------|----------------------------------------------|----------------------------------------------|------------|------------|
| 0                | 246.0                            | 84.4                             | 2.91     | 2.89                 | 3.7                  | 84.4                                         | 68                                           | 96.24      | 3.76       |
| 85               | 232.2                            | 79.5                             | 2.92     | 2.89                 | 3.7                  | 79.5                                         | 65                                           | 95.40      | 4.60       |
| 175              | 268.5                            | 92.2                             | 2.91     | 2.89                 | 3.7                  | 92.2                                         | 73                                           | 96.57      | 3.43       |
| 260              | 253.8                            | 87.8                             | 2.89     | 2.89                 | 3.7                  | 87.8                                         | 71                                           | 99.90      | 0.10       |
| 310              | 529.2                            | 181                              | 2.92     | 2.89                 | 3.7                  | 181                                          | 144                                          | 94.82      | 5.18       |

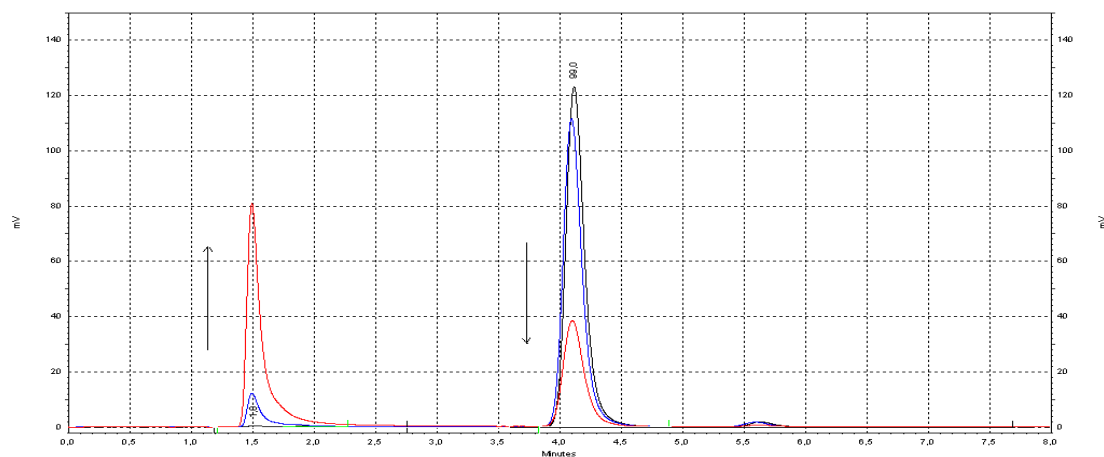

Figure 1 HPLC Chromatograms of the conversion of lactone to carboxylate of free CPT with time elapsed.

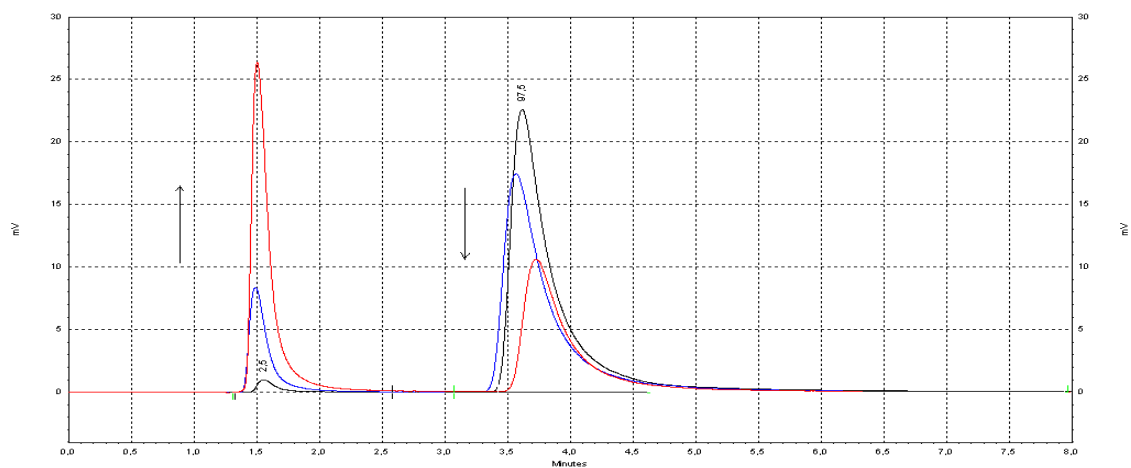

Figure 2 HPLC Chromatograms of the conversion of lactone to carboxylate of TPT with time elapsed.

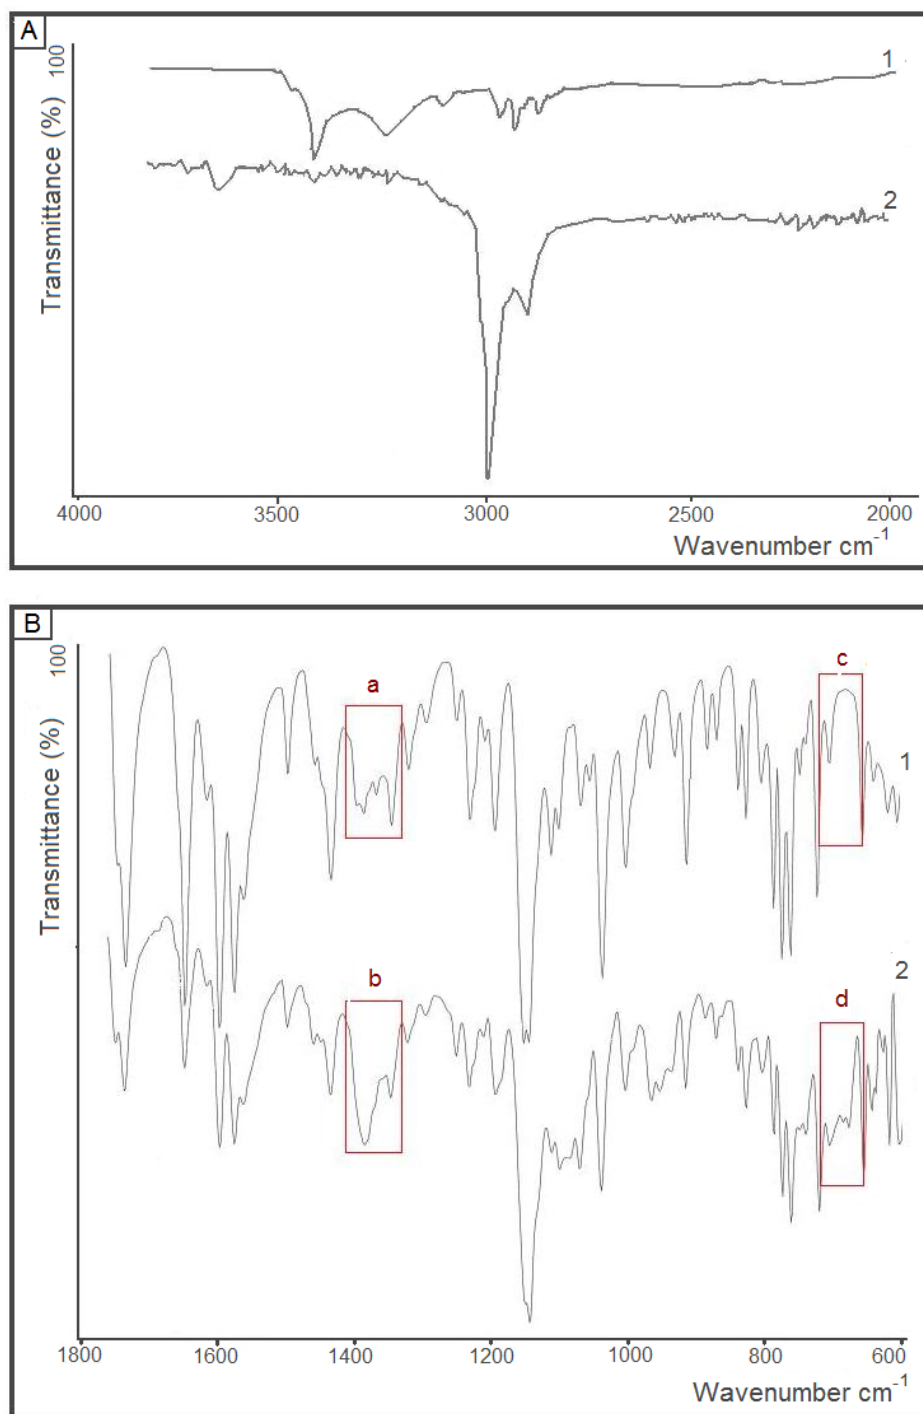

Figure 3 ATR-FTIR spectra of powder CPT (1) and CPT in copolymer gel (2) in the range of 2000-4000  $\text{cm}^{-1}$  (A) and 600-1800  $\text{cm}^{-1}$  (B). Copolymer gel was recorded as background.

**Copy of the HPLC spectra**

First measurement of three independent data for free CPT in tris buffer at pH=7.4

t=0 min

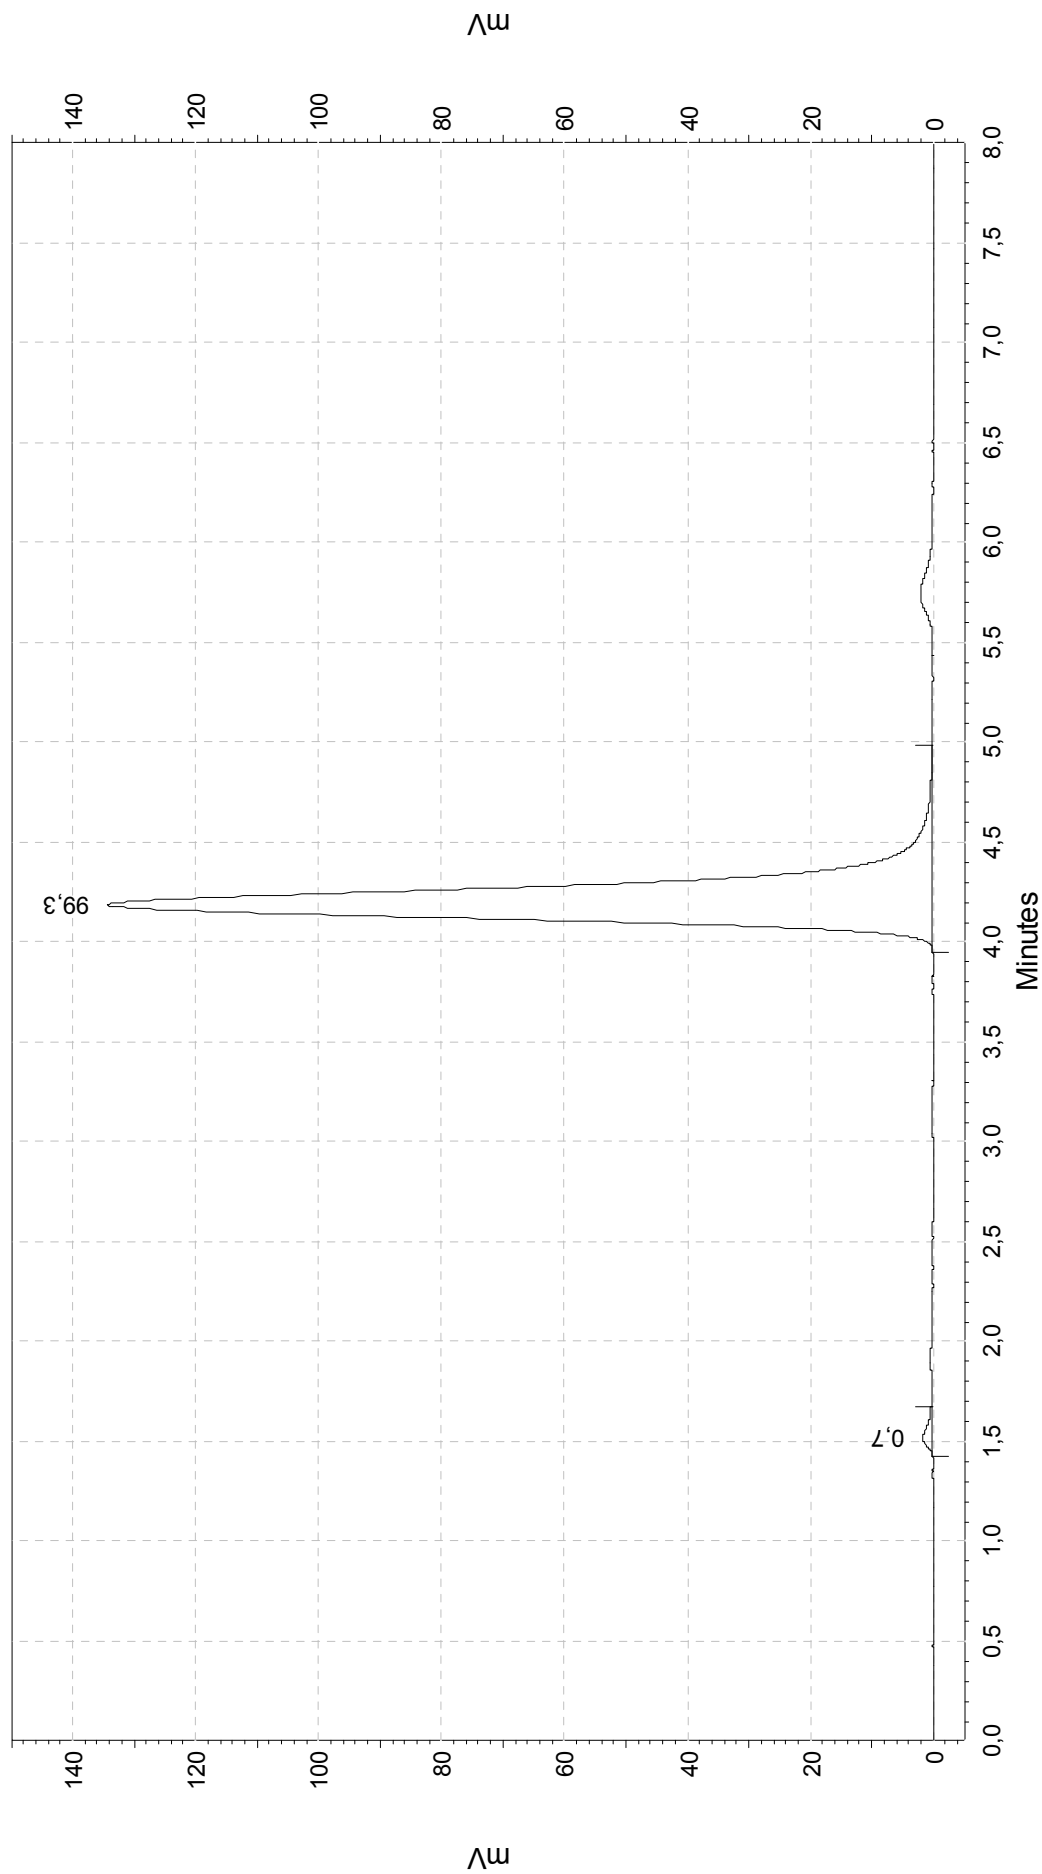

First measurement of three independent data for free CPT in tris buffer at pH=7.4  
t=20 min

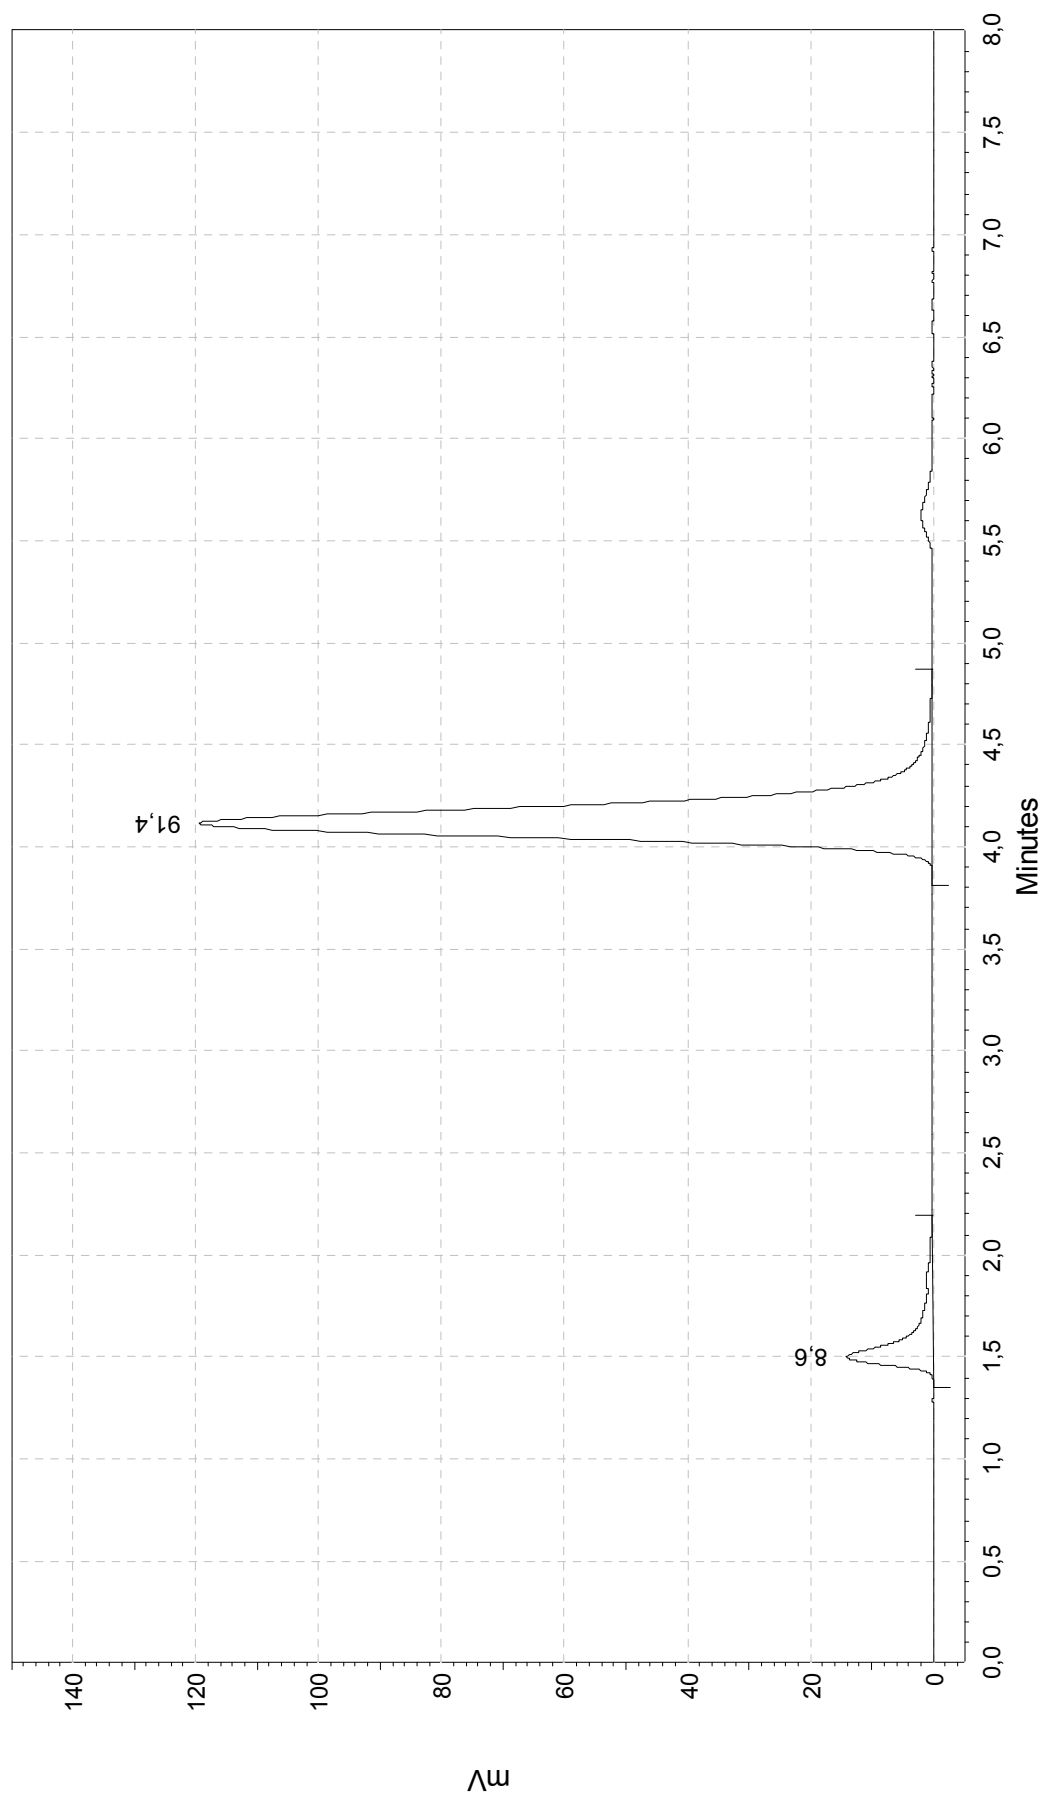



First measurement of three independent data for free CPT in tris buffer at pH=7.4  
t=39 min

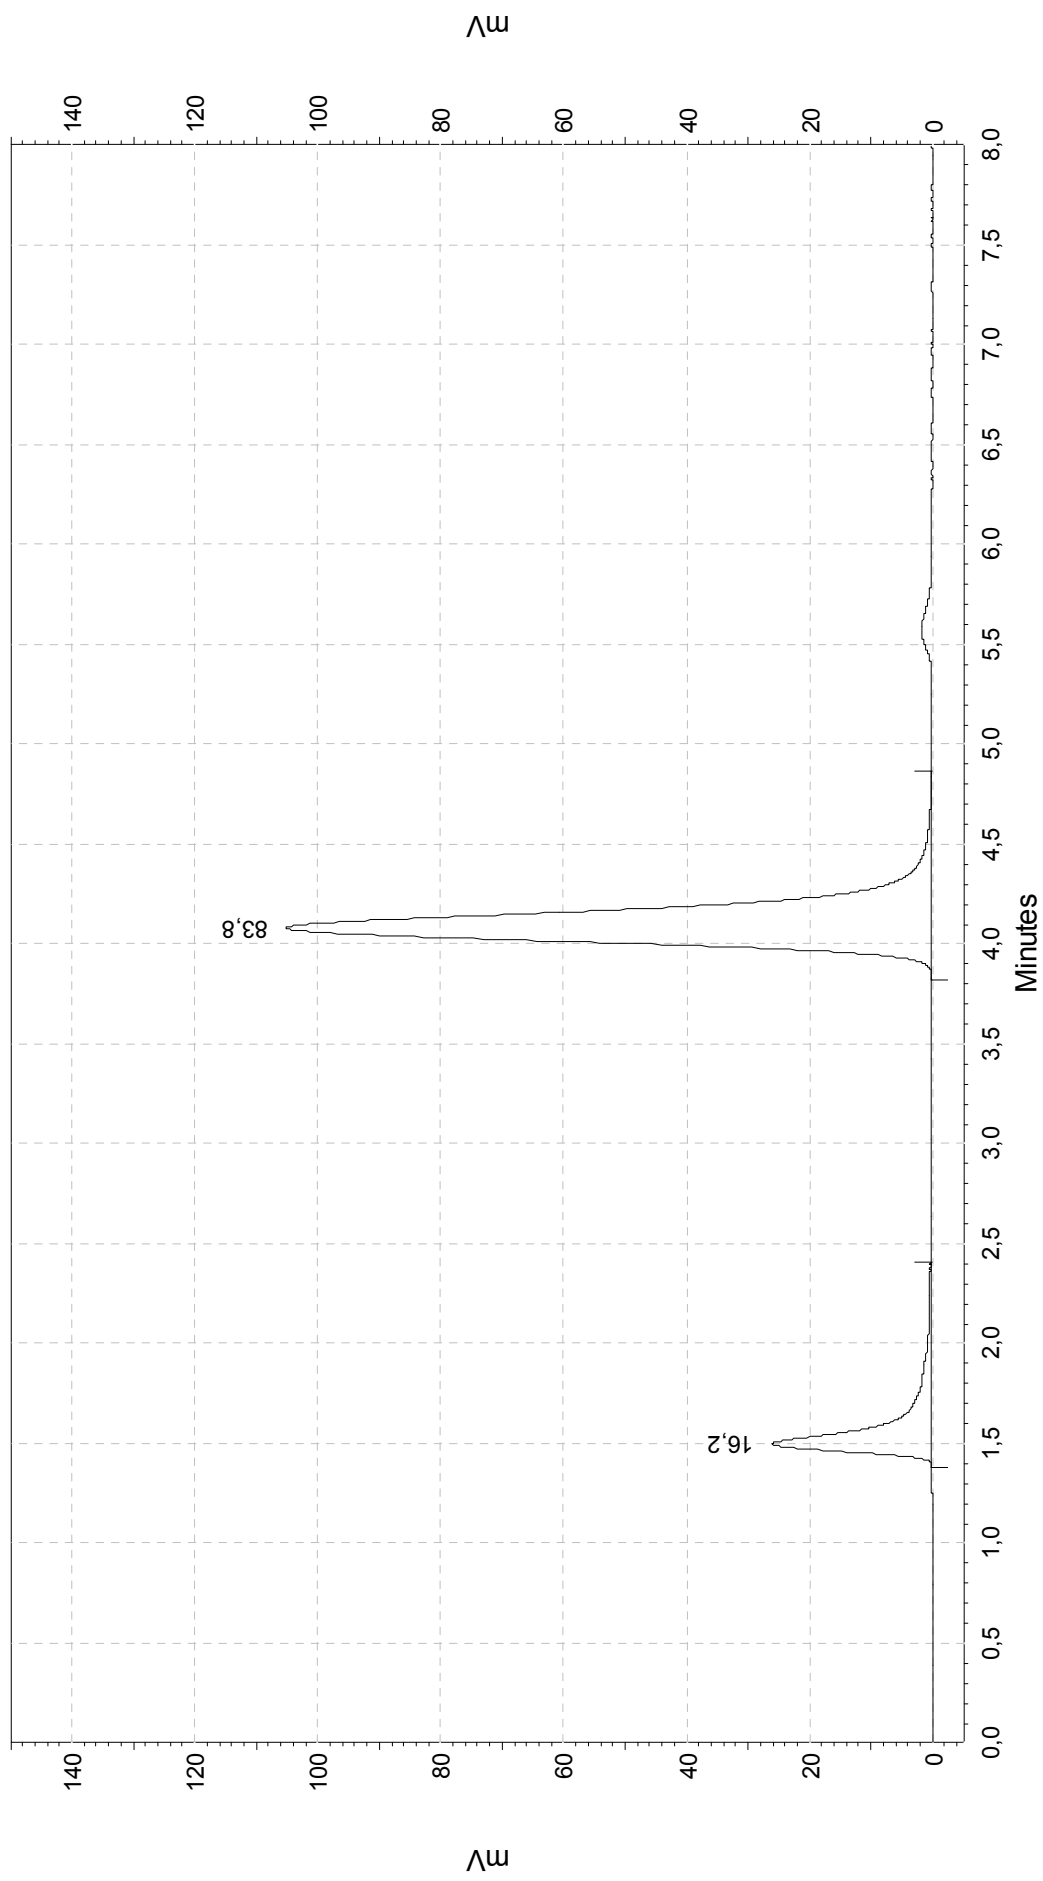

First measurement of three independent data for free CPT in tris buffer at pH=7.4  
t=58 min

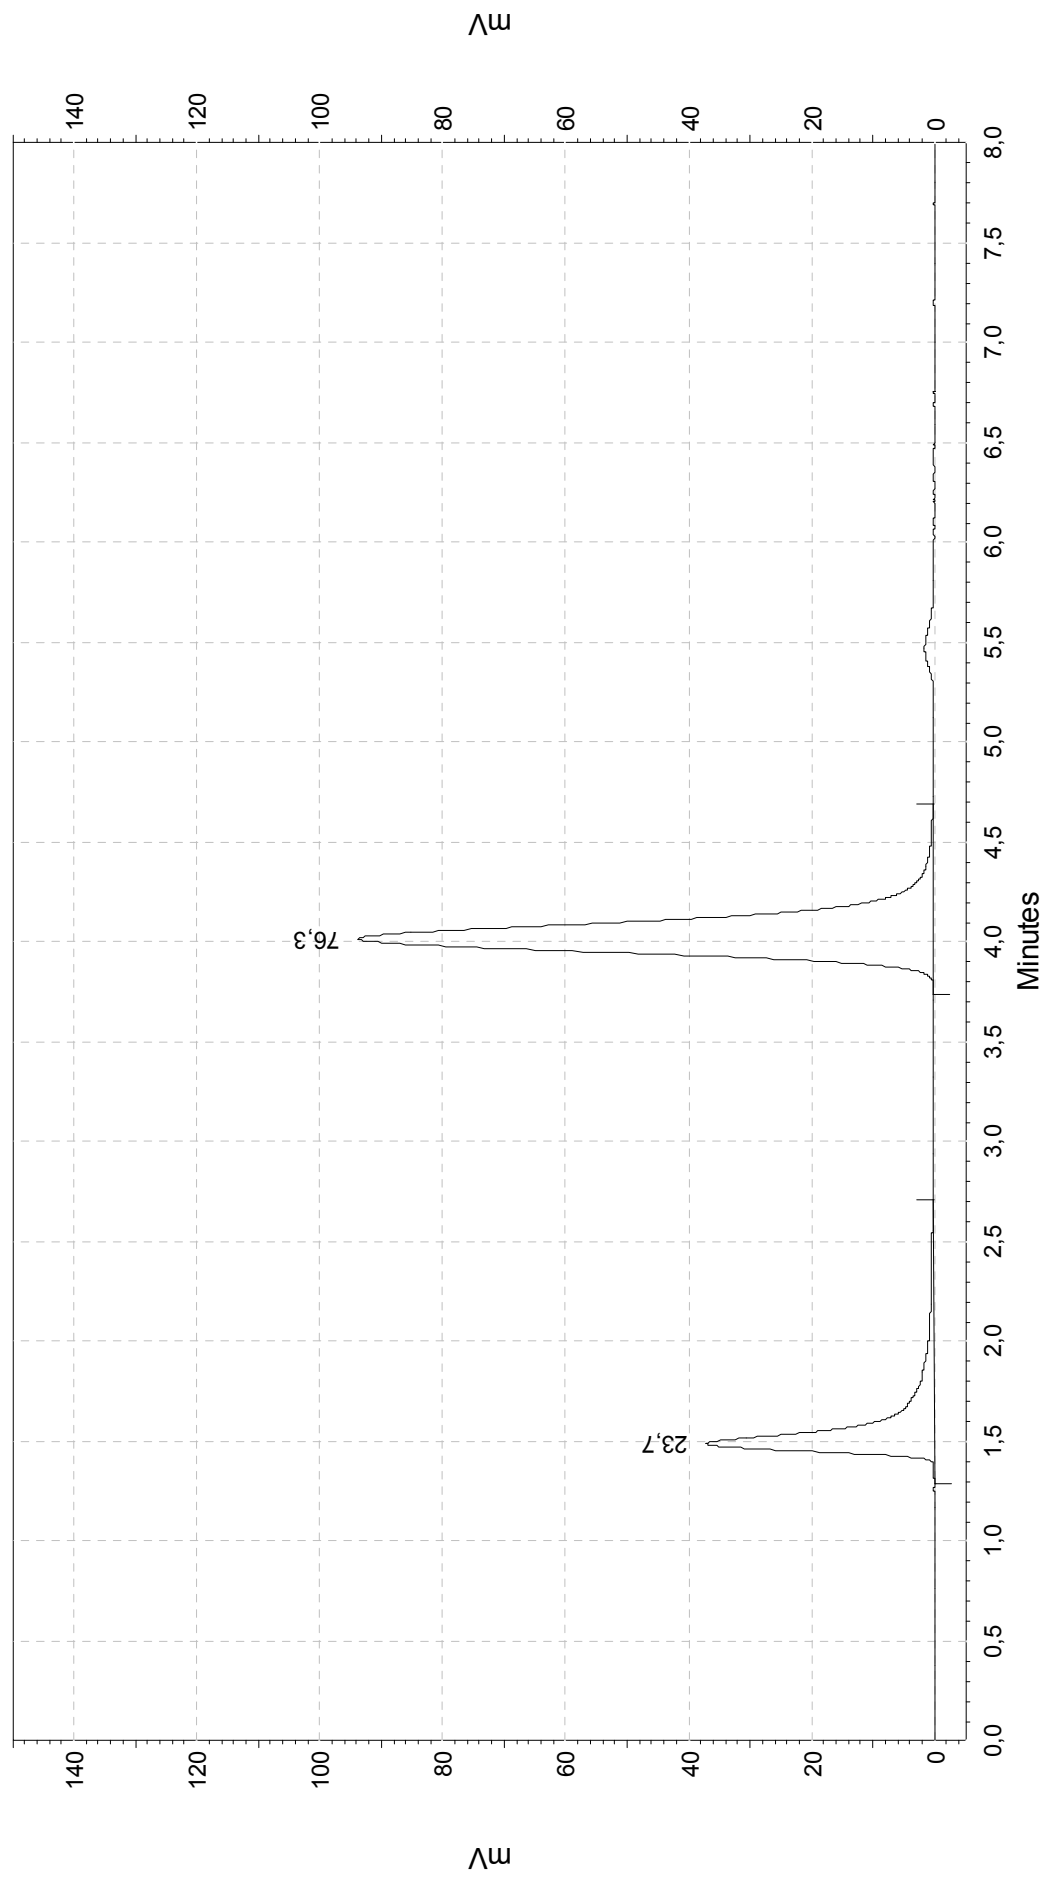

First measurement of three independent data for free CPT in tris buffer at pH=7.4  
t=78 min

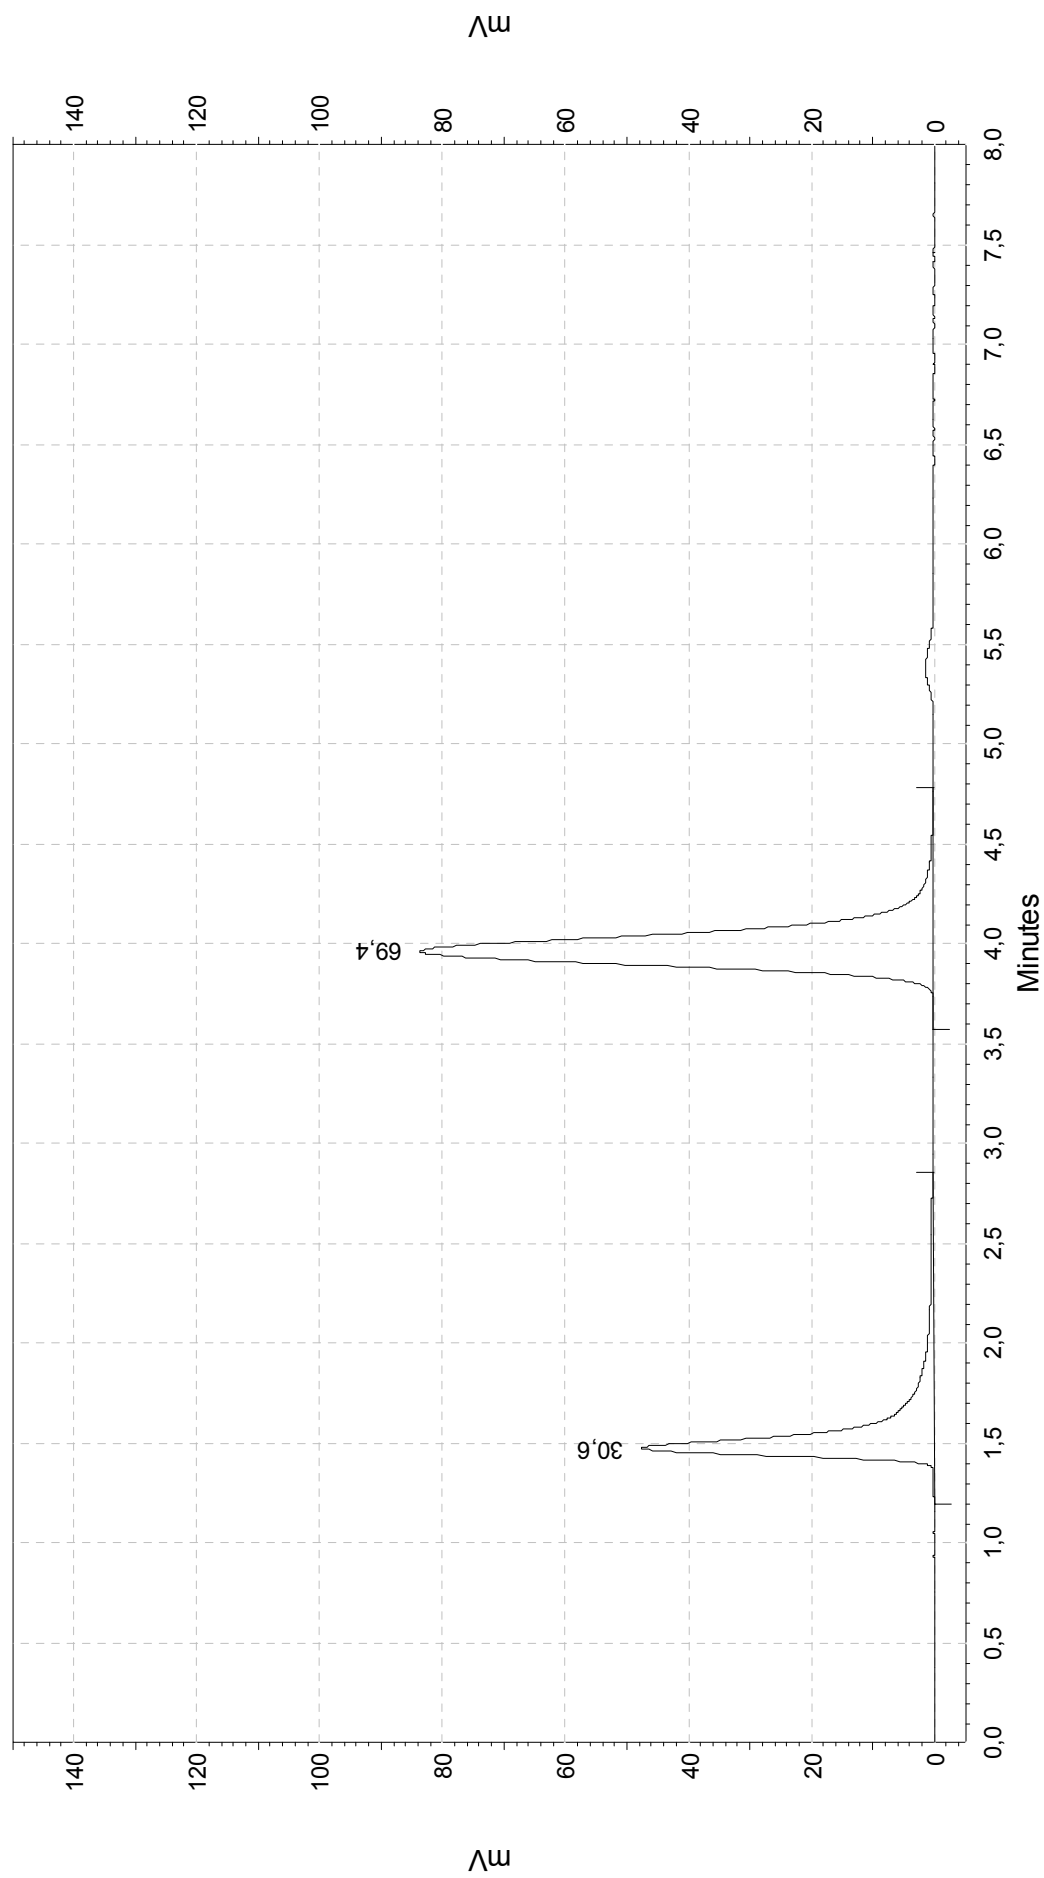

First measurement of three independent data for free CPT in tris buffer at pH=7.4  
t=97 min

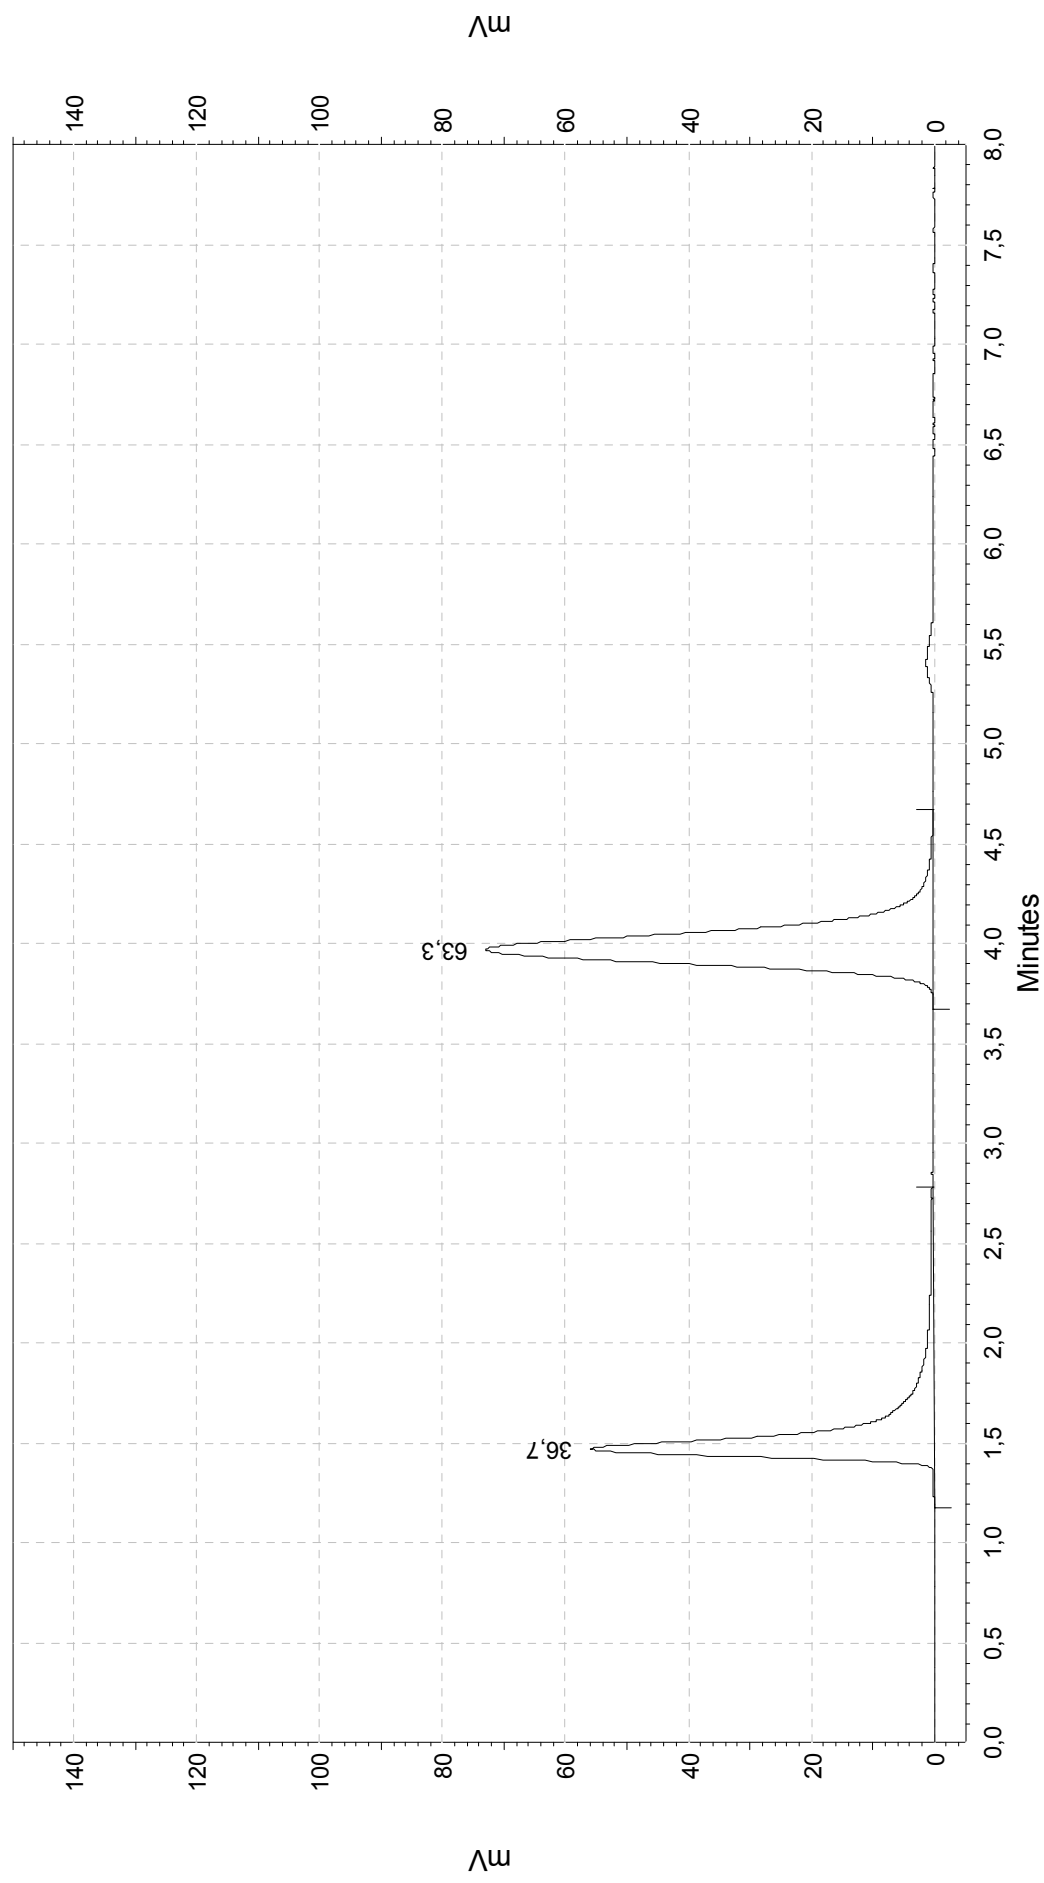

First measurement of three independent data for free CPT in tris buffer at pH=7.4  
t=117 min

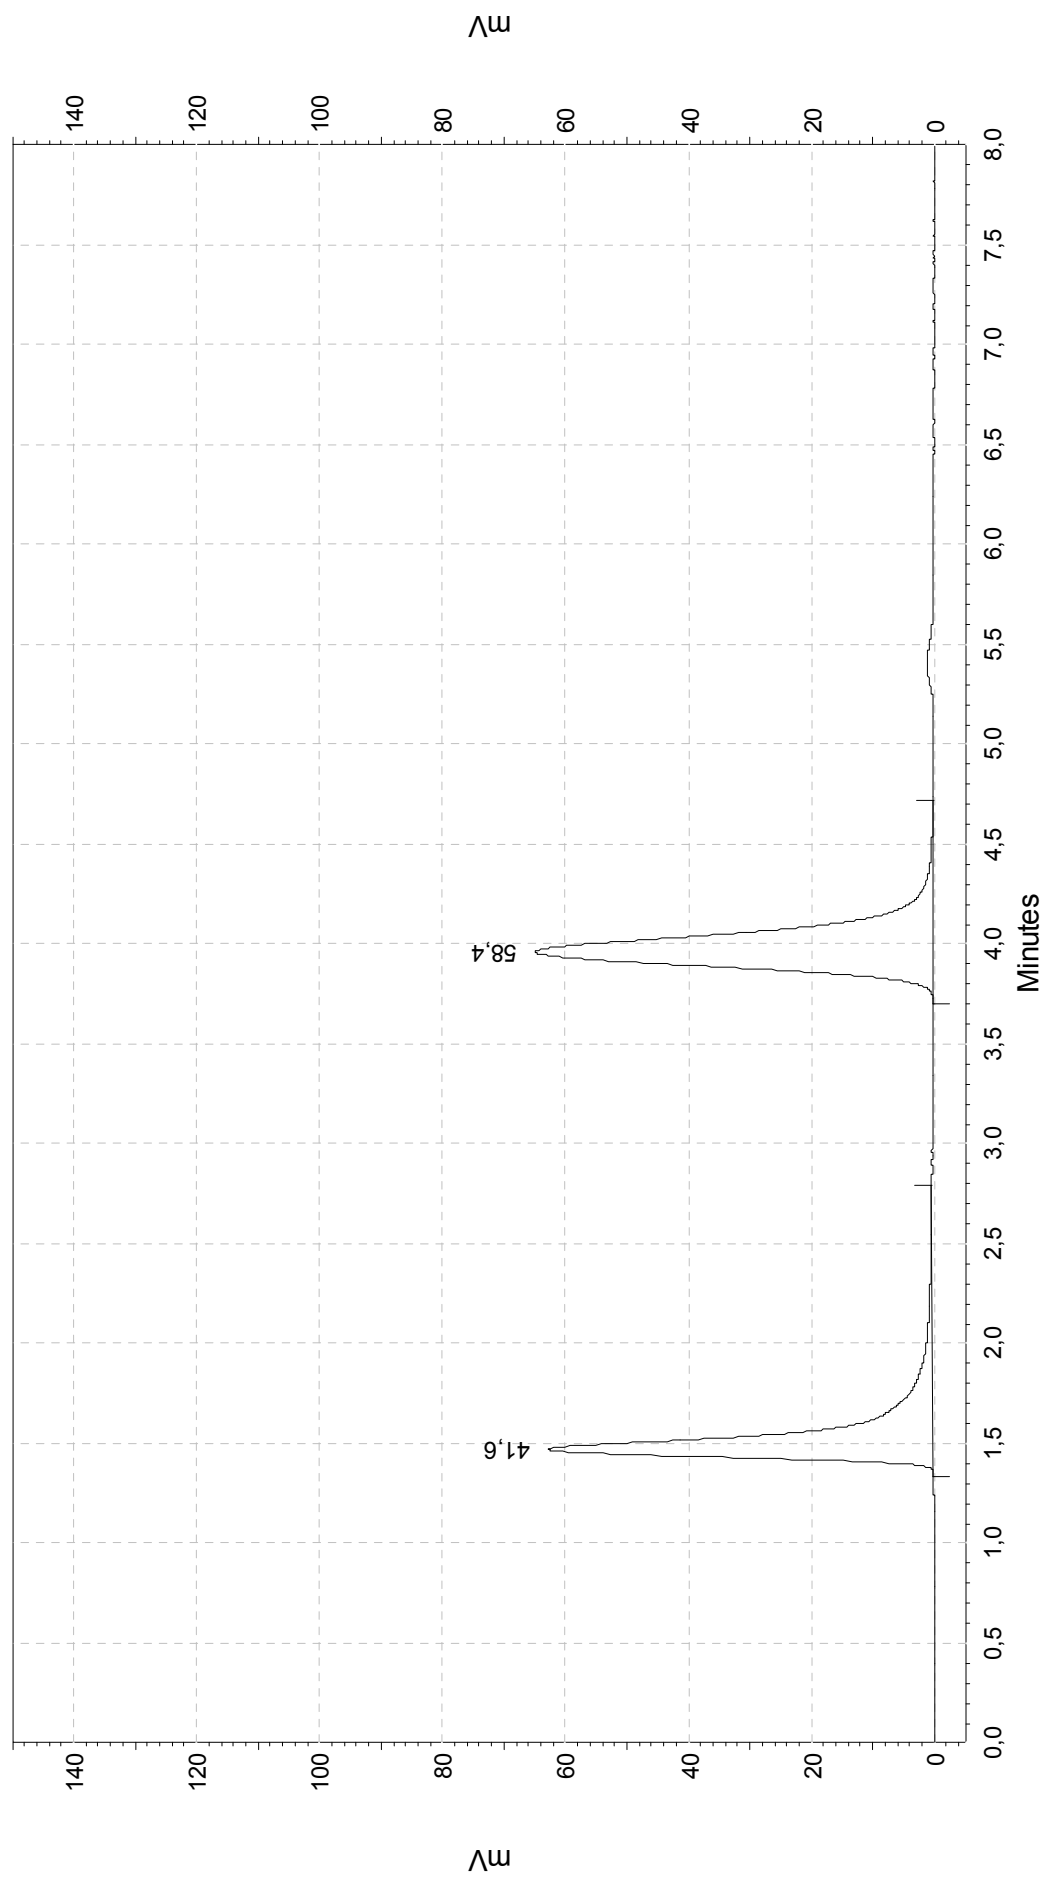

First measurement of three independent data for free CPT in tris buffer at pH=7.4  
t=136 min

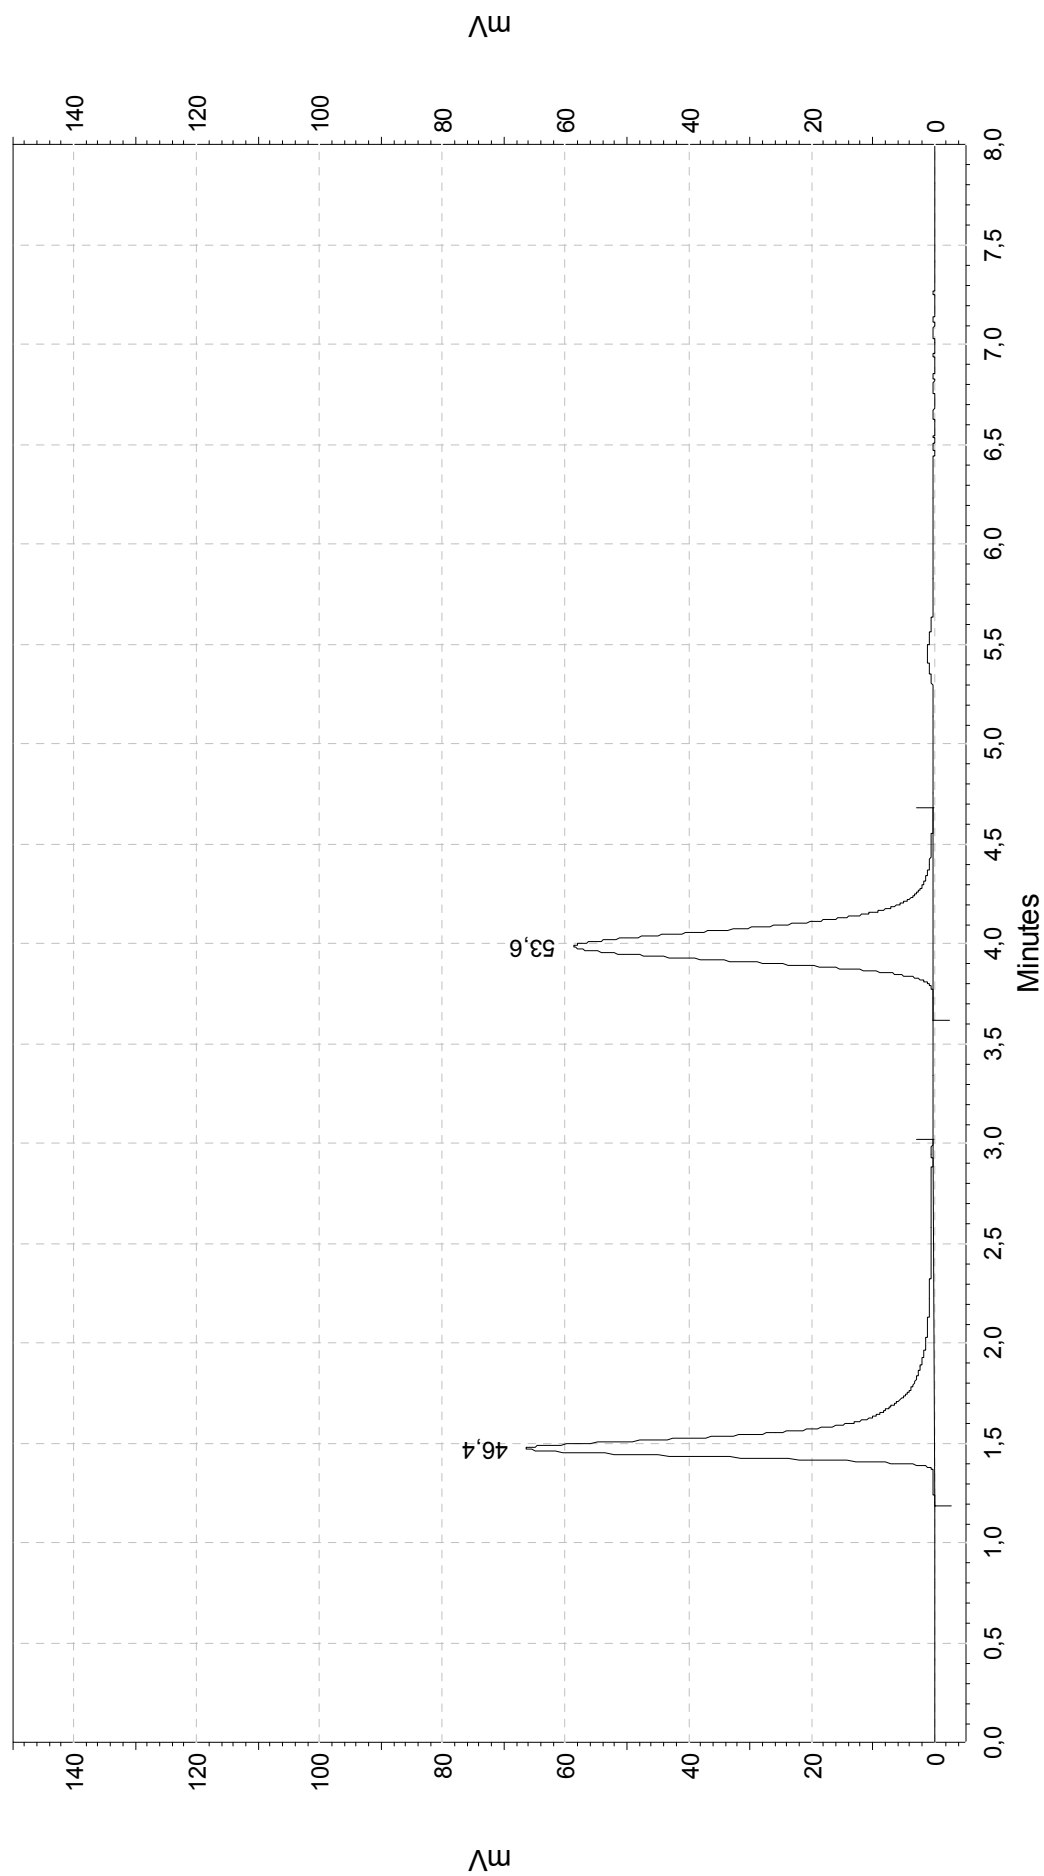

First measurement of three independent data for free CPT in tris buffer at pH=7.4  
t=155 min

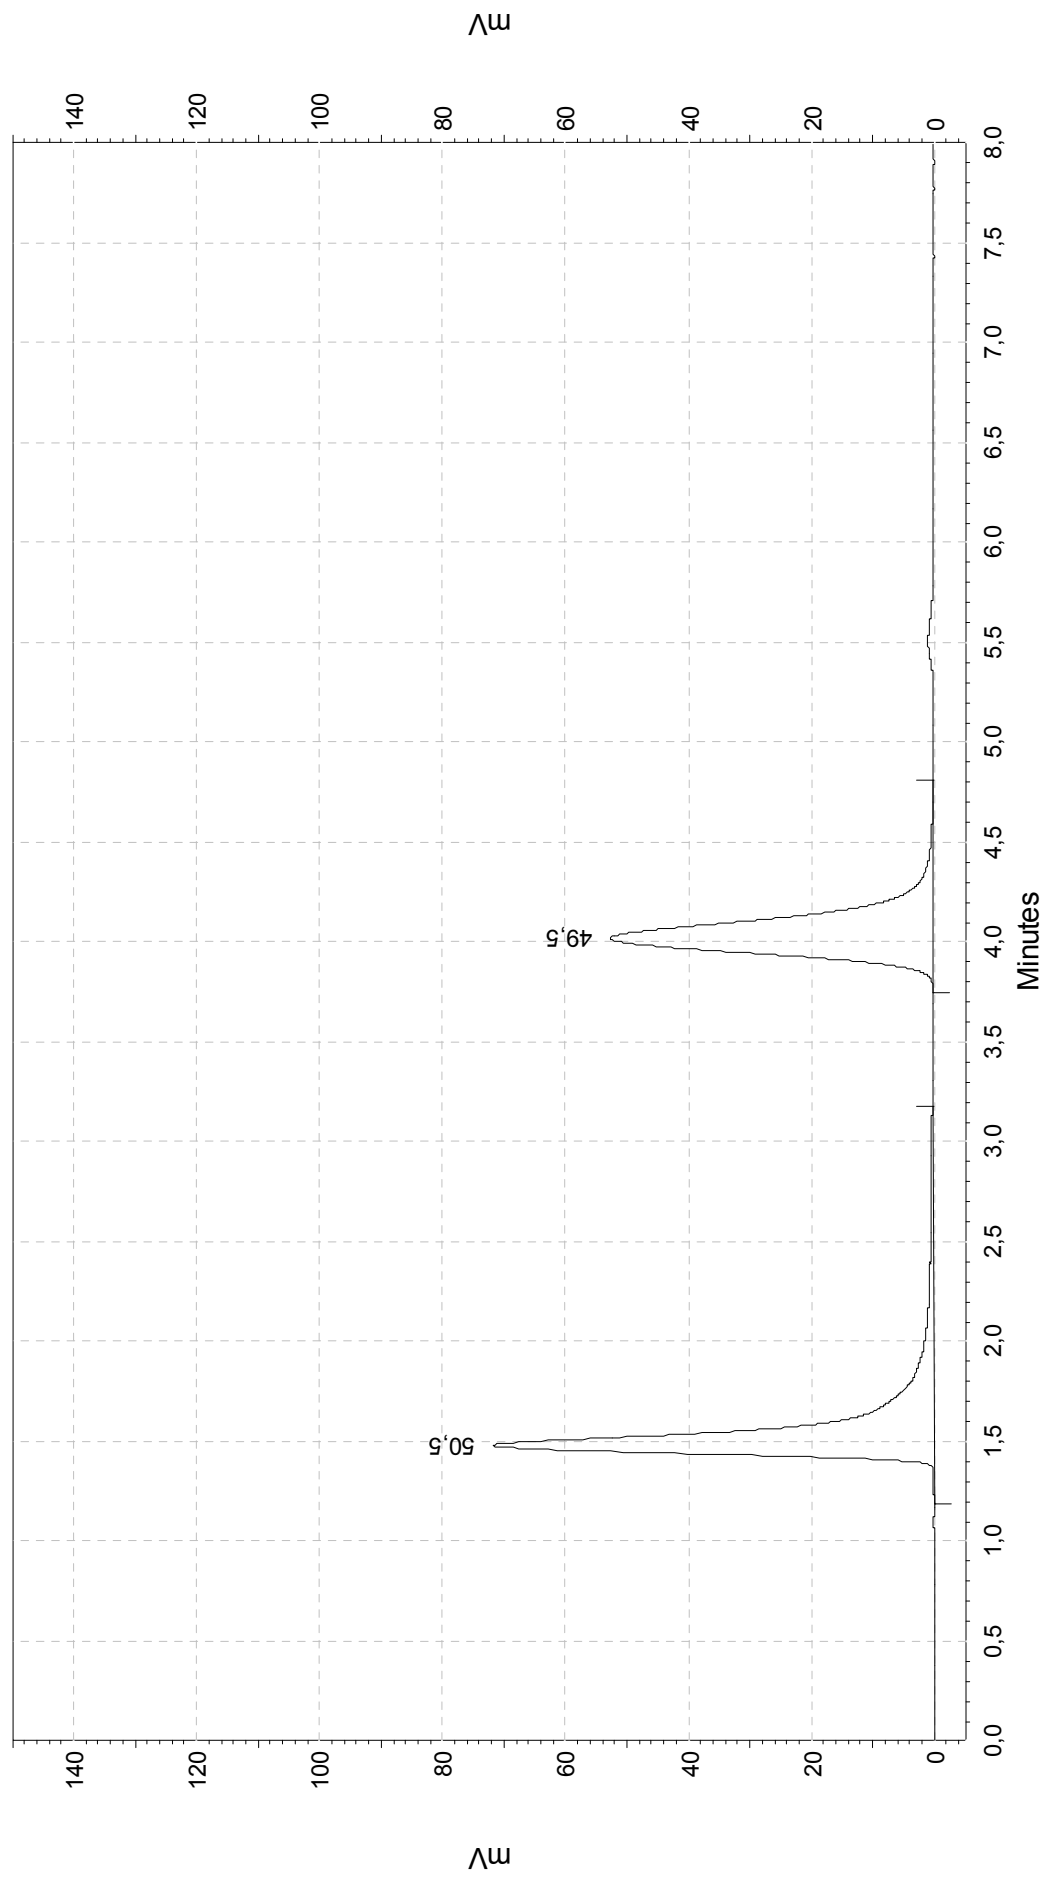

First measurement of three independent data for free CPT in tris buffer at pH=7.4  
t=175 min

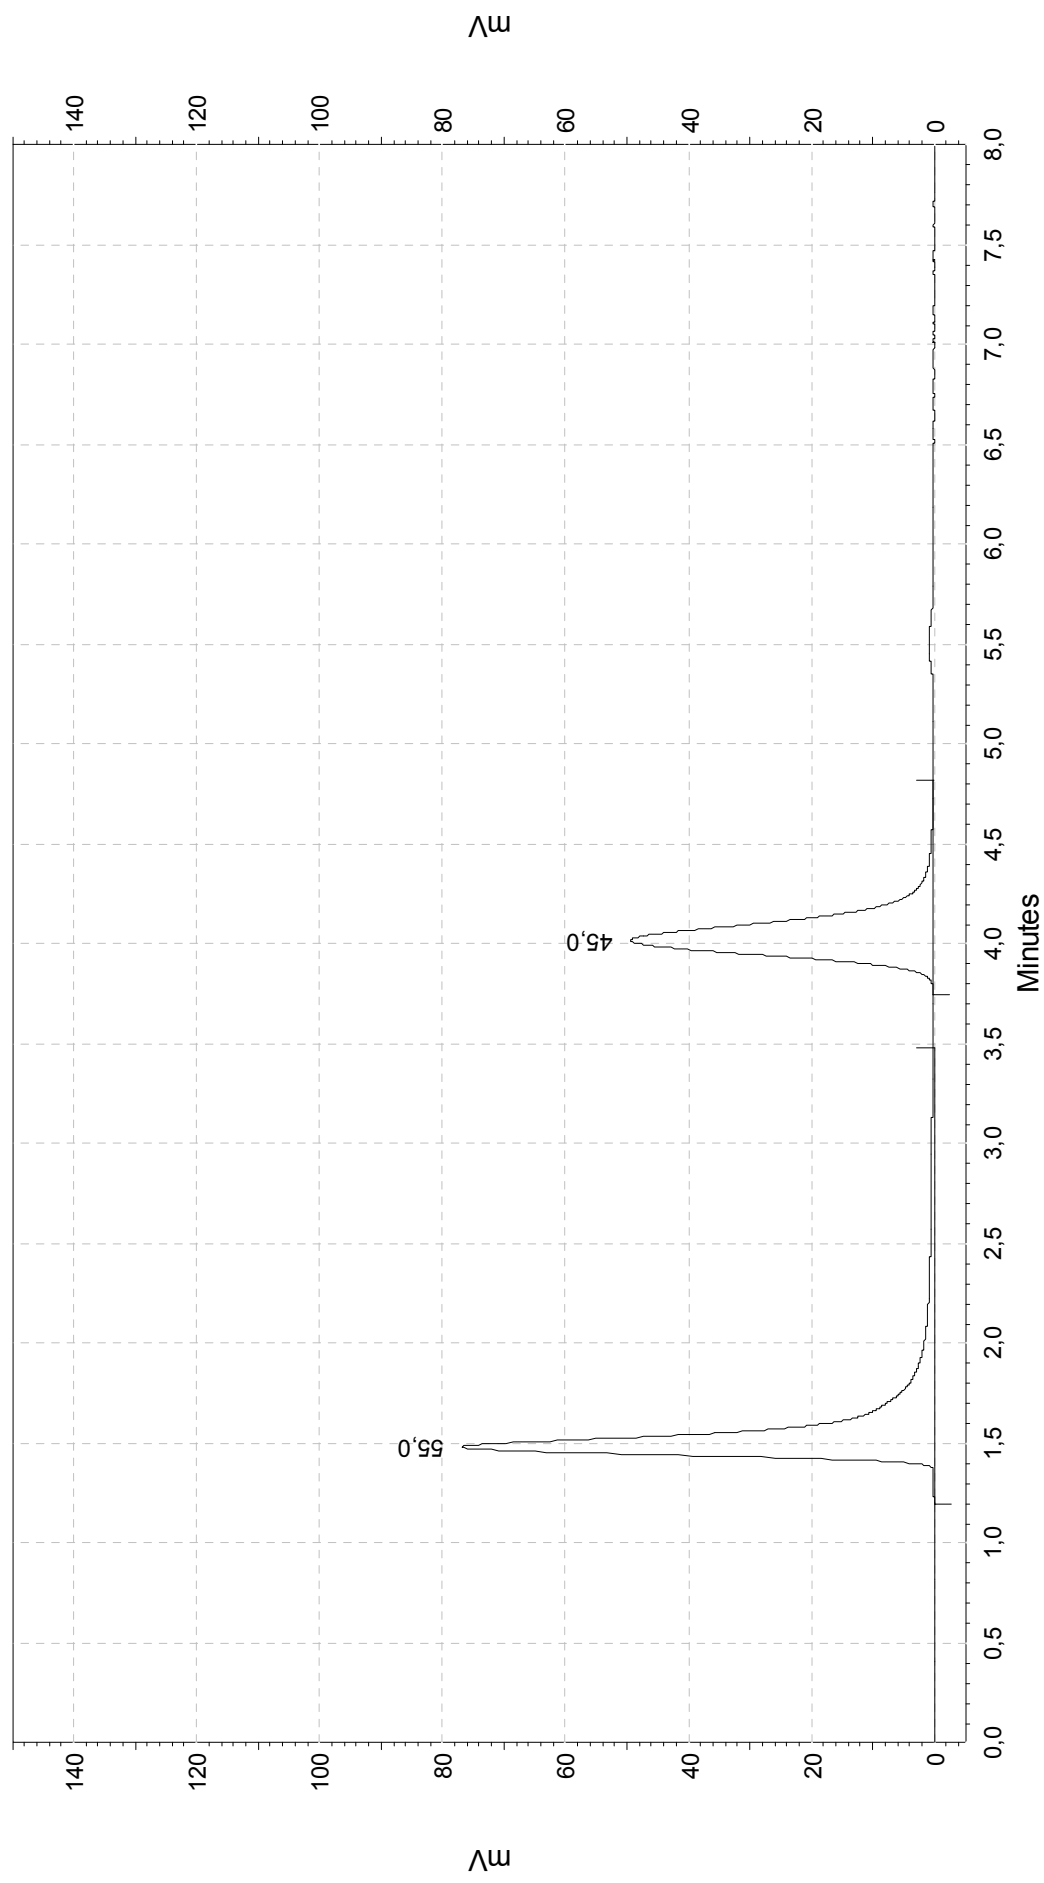



First measurement of three independent data for free CPT in tris buffer at pH=7.4  
t= 194 min

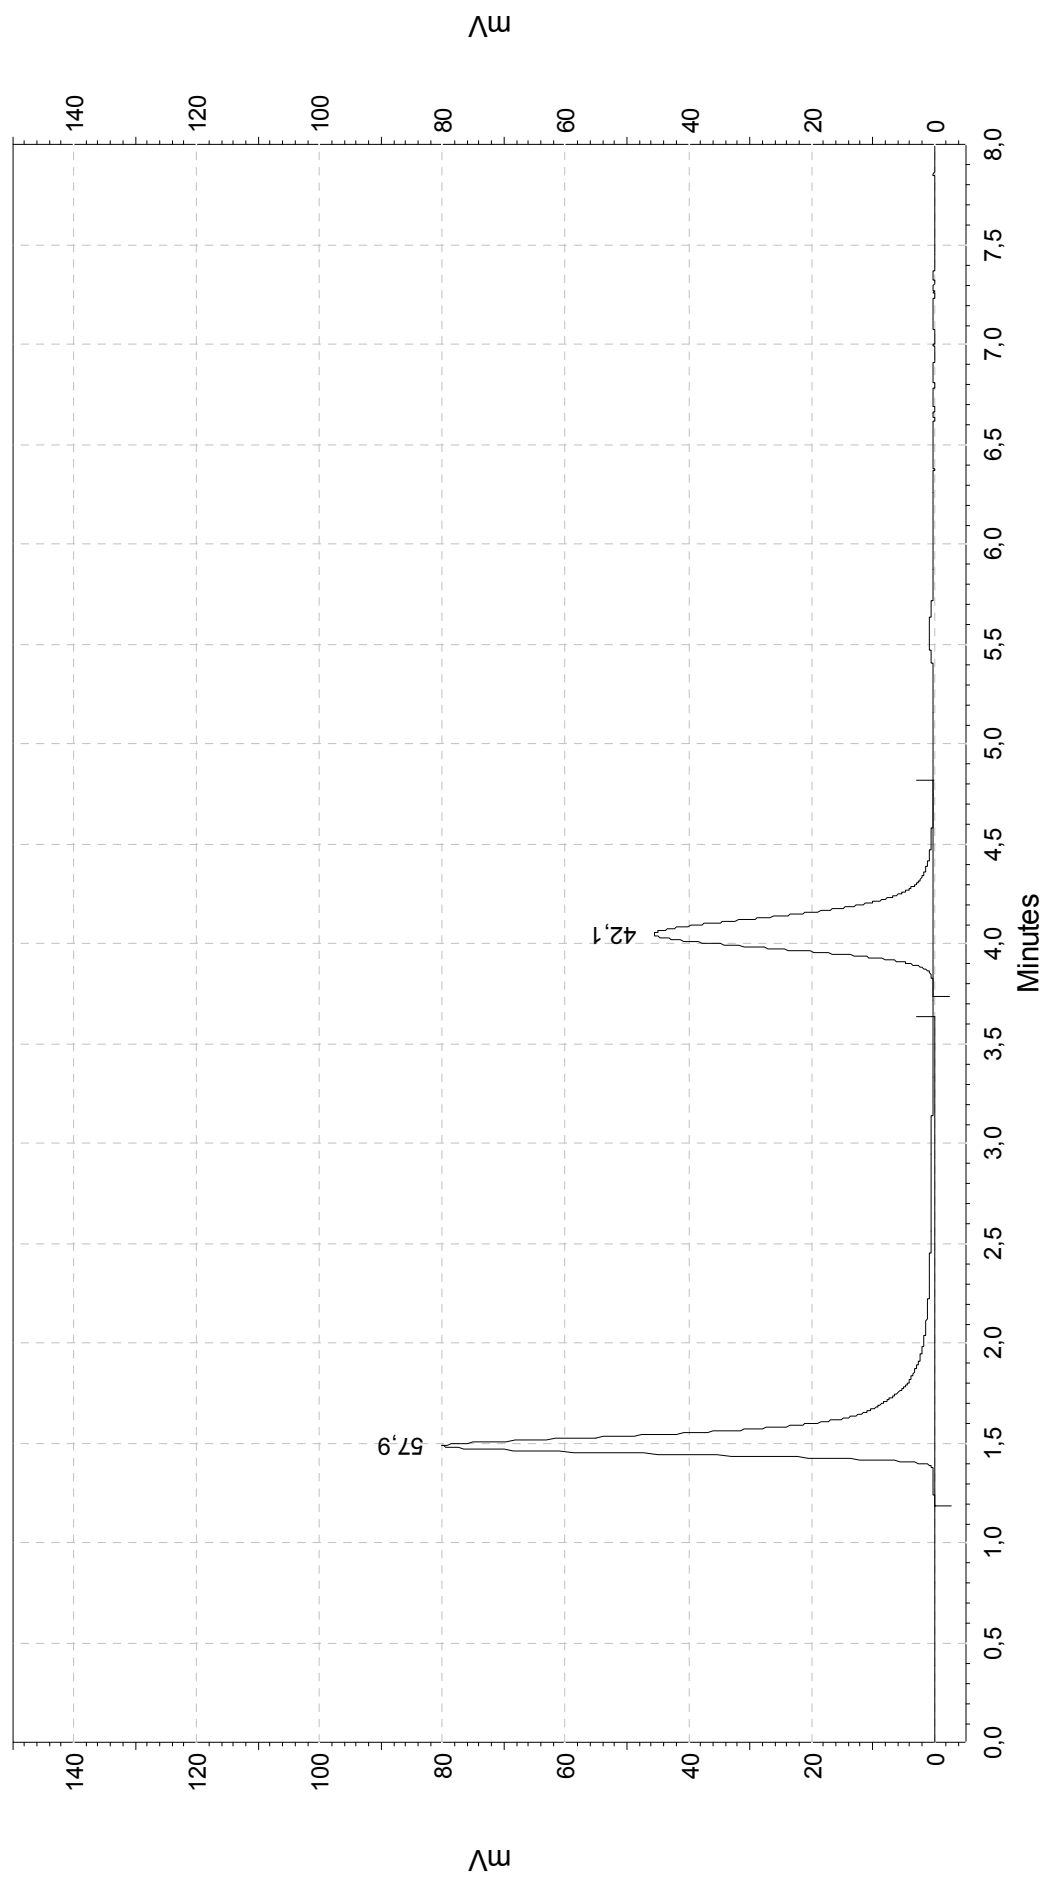

First measurement of three independent data for free CPT in tris buffer at pH=7.4  
t=213 min

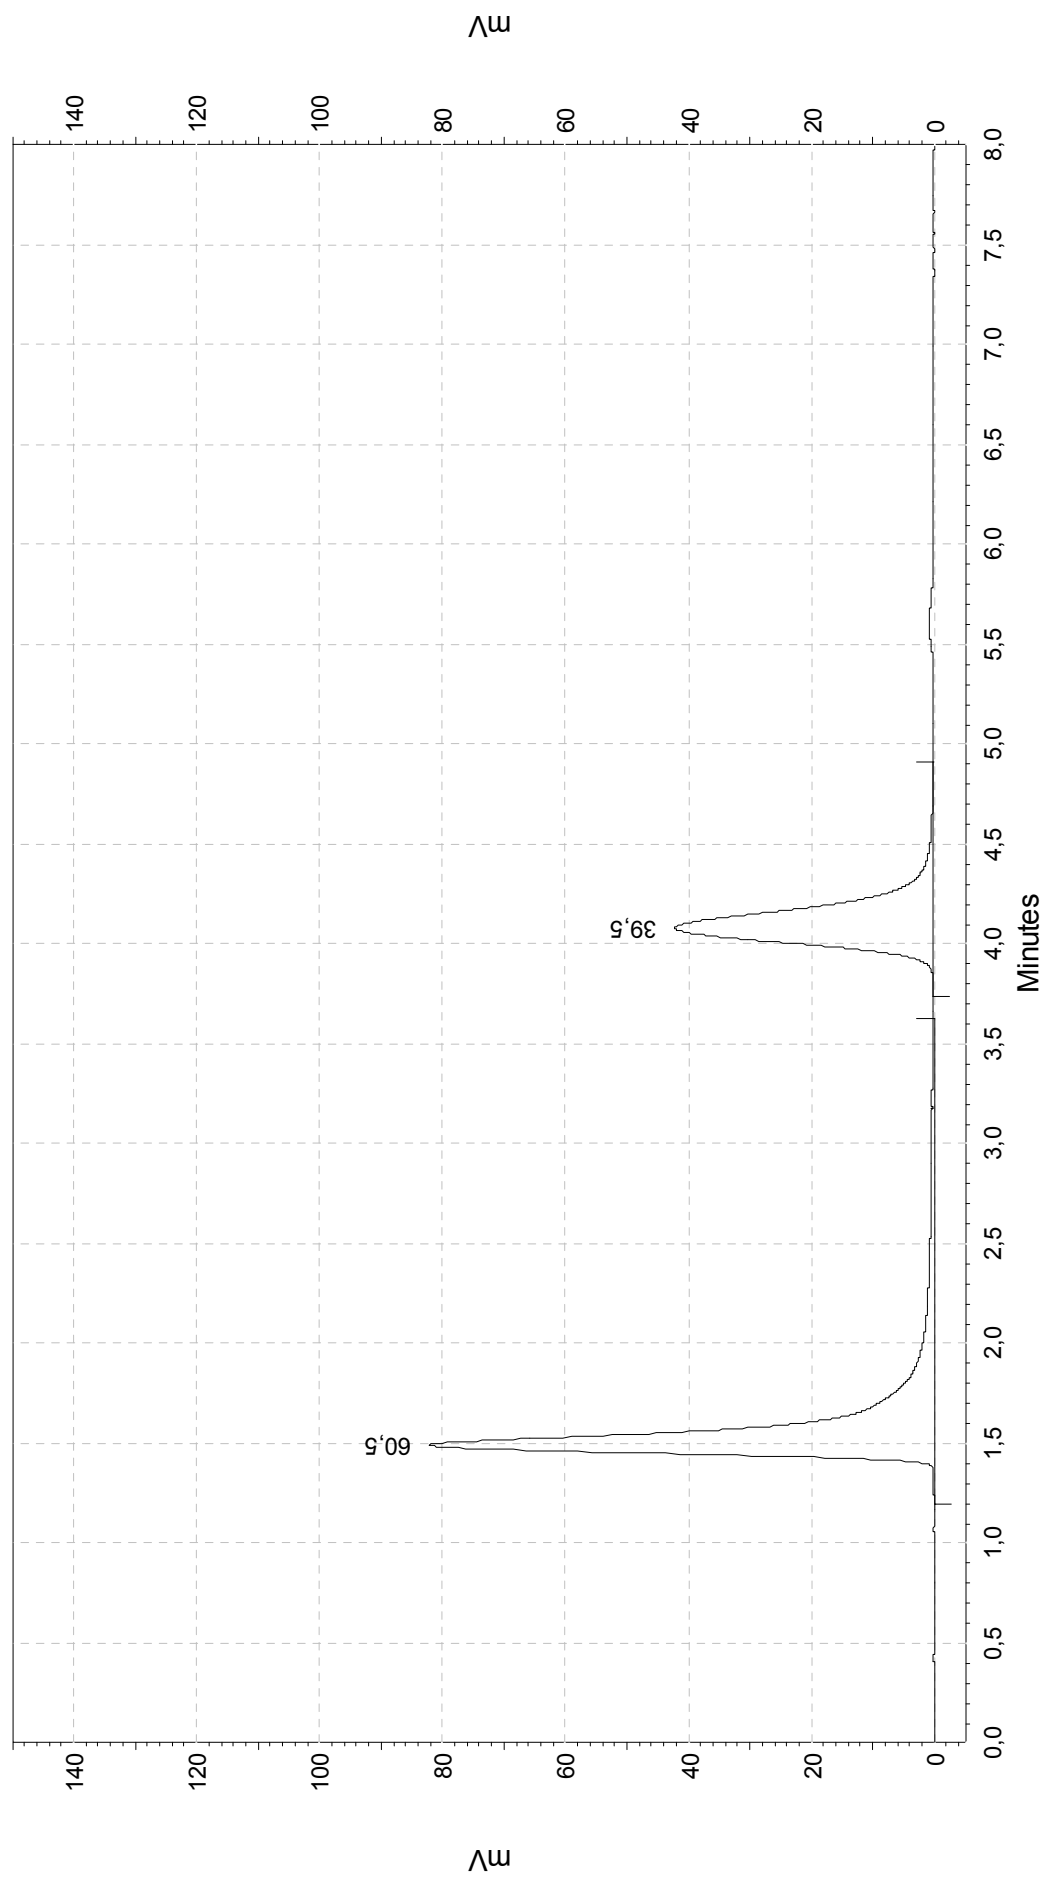

First measurement of three independent data for free CPT in tris buffer at pH=7.4  
t=232 min

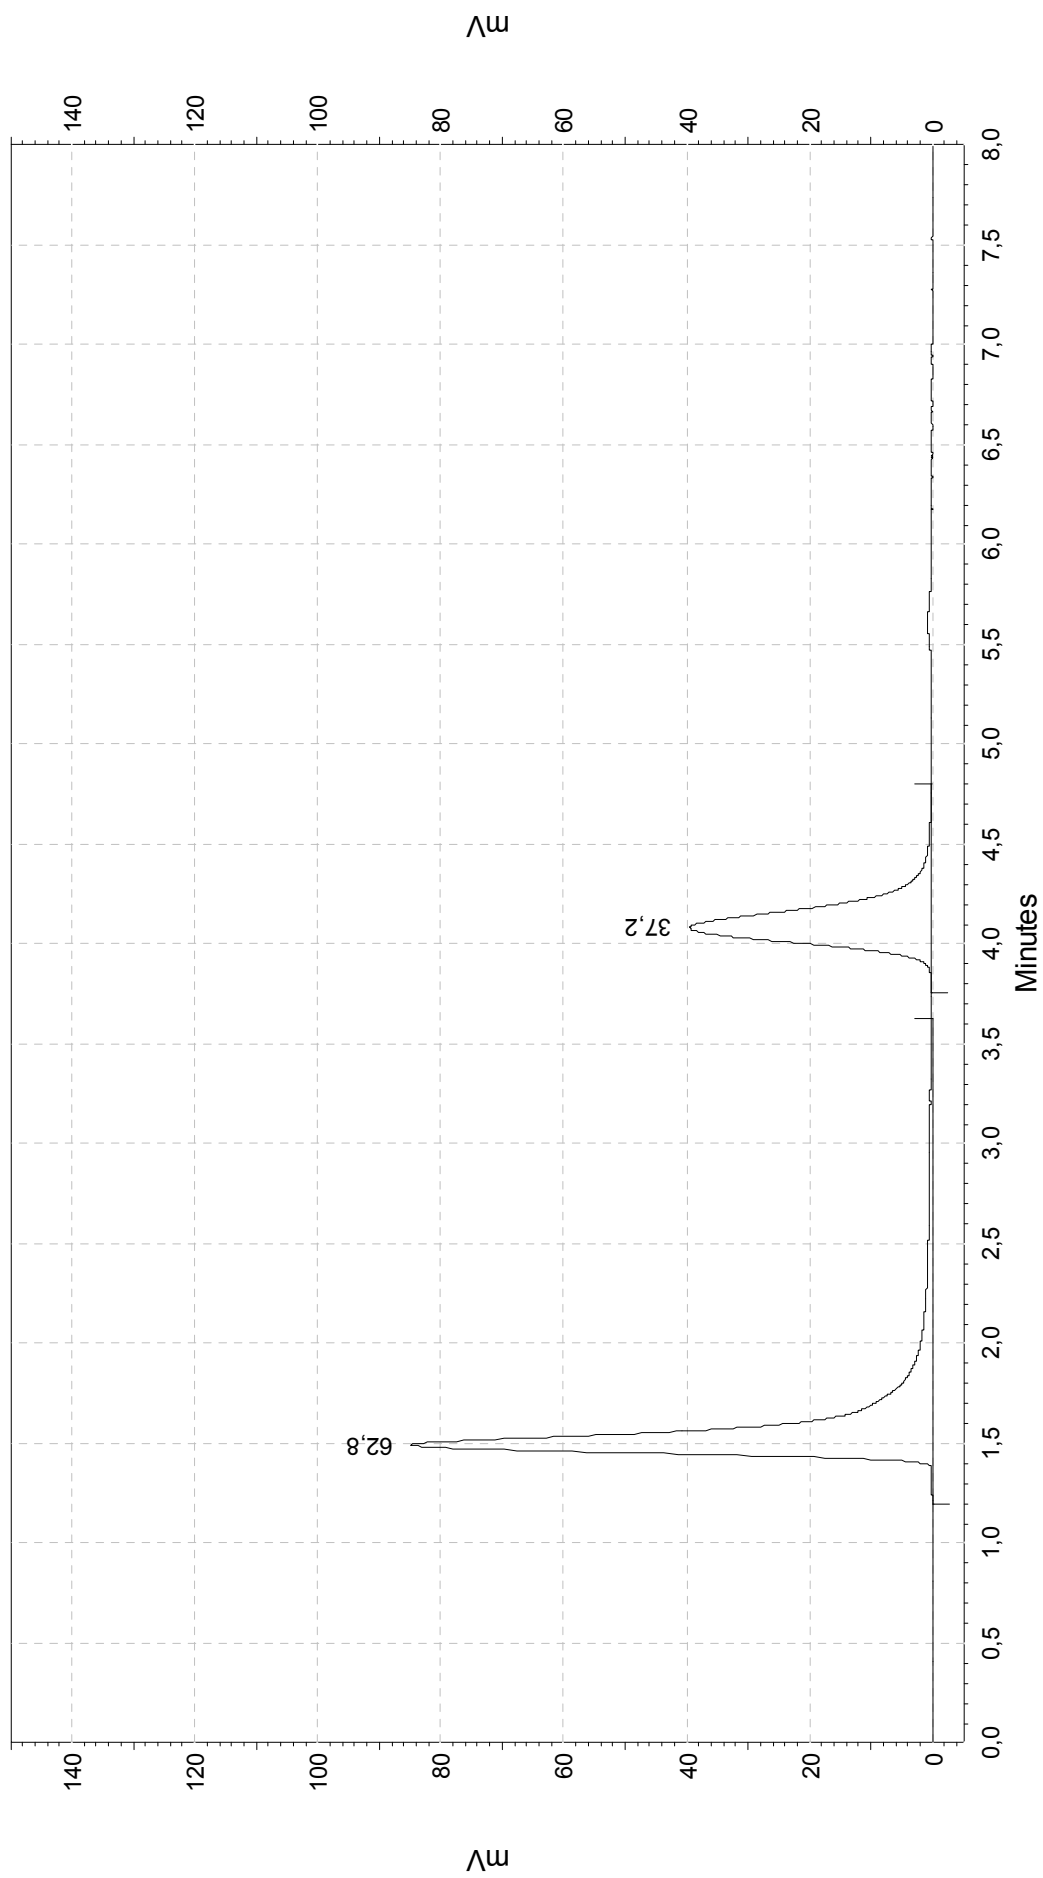

First measurement of three independent data for free CPT in tris buffer at pH=7.4  
t=252 min

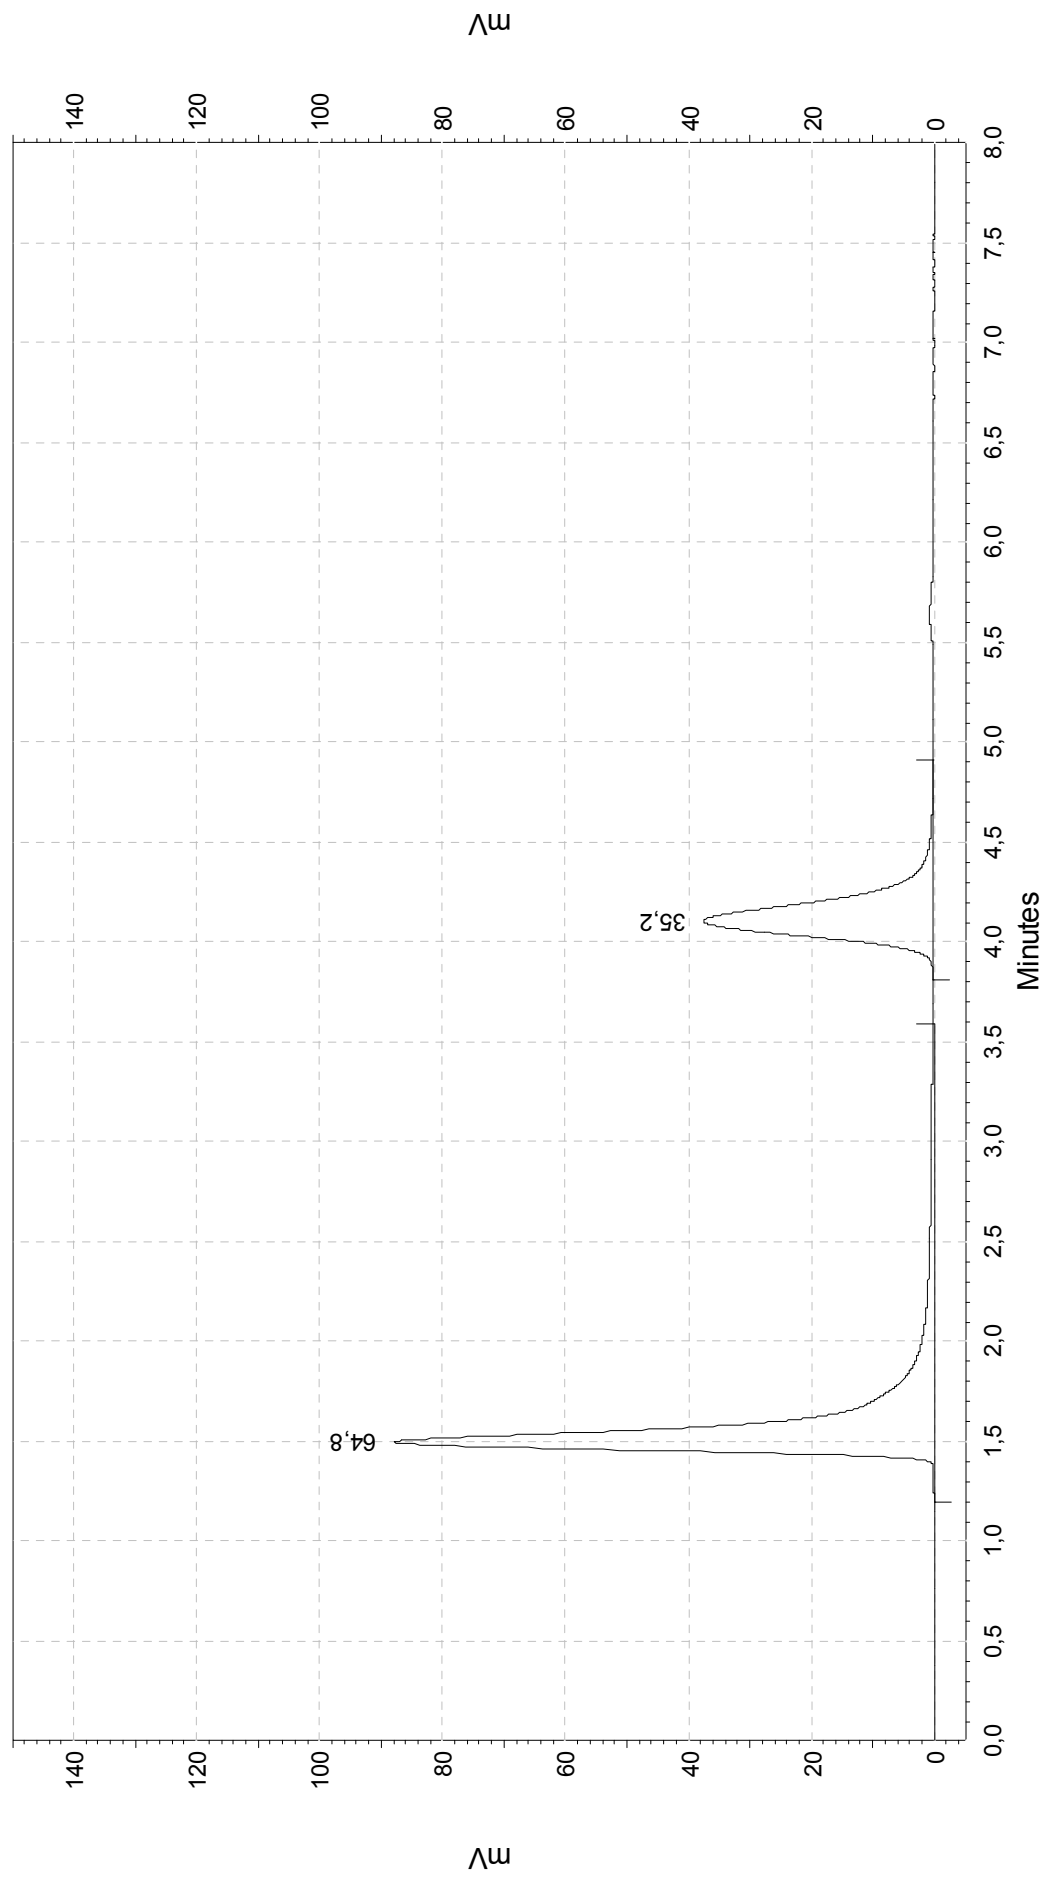

First measurement of three independent data for free CPT in tris buffer at pH=7.4  
t=271 min

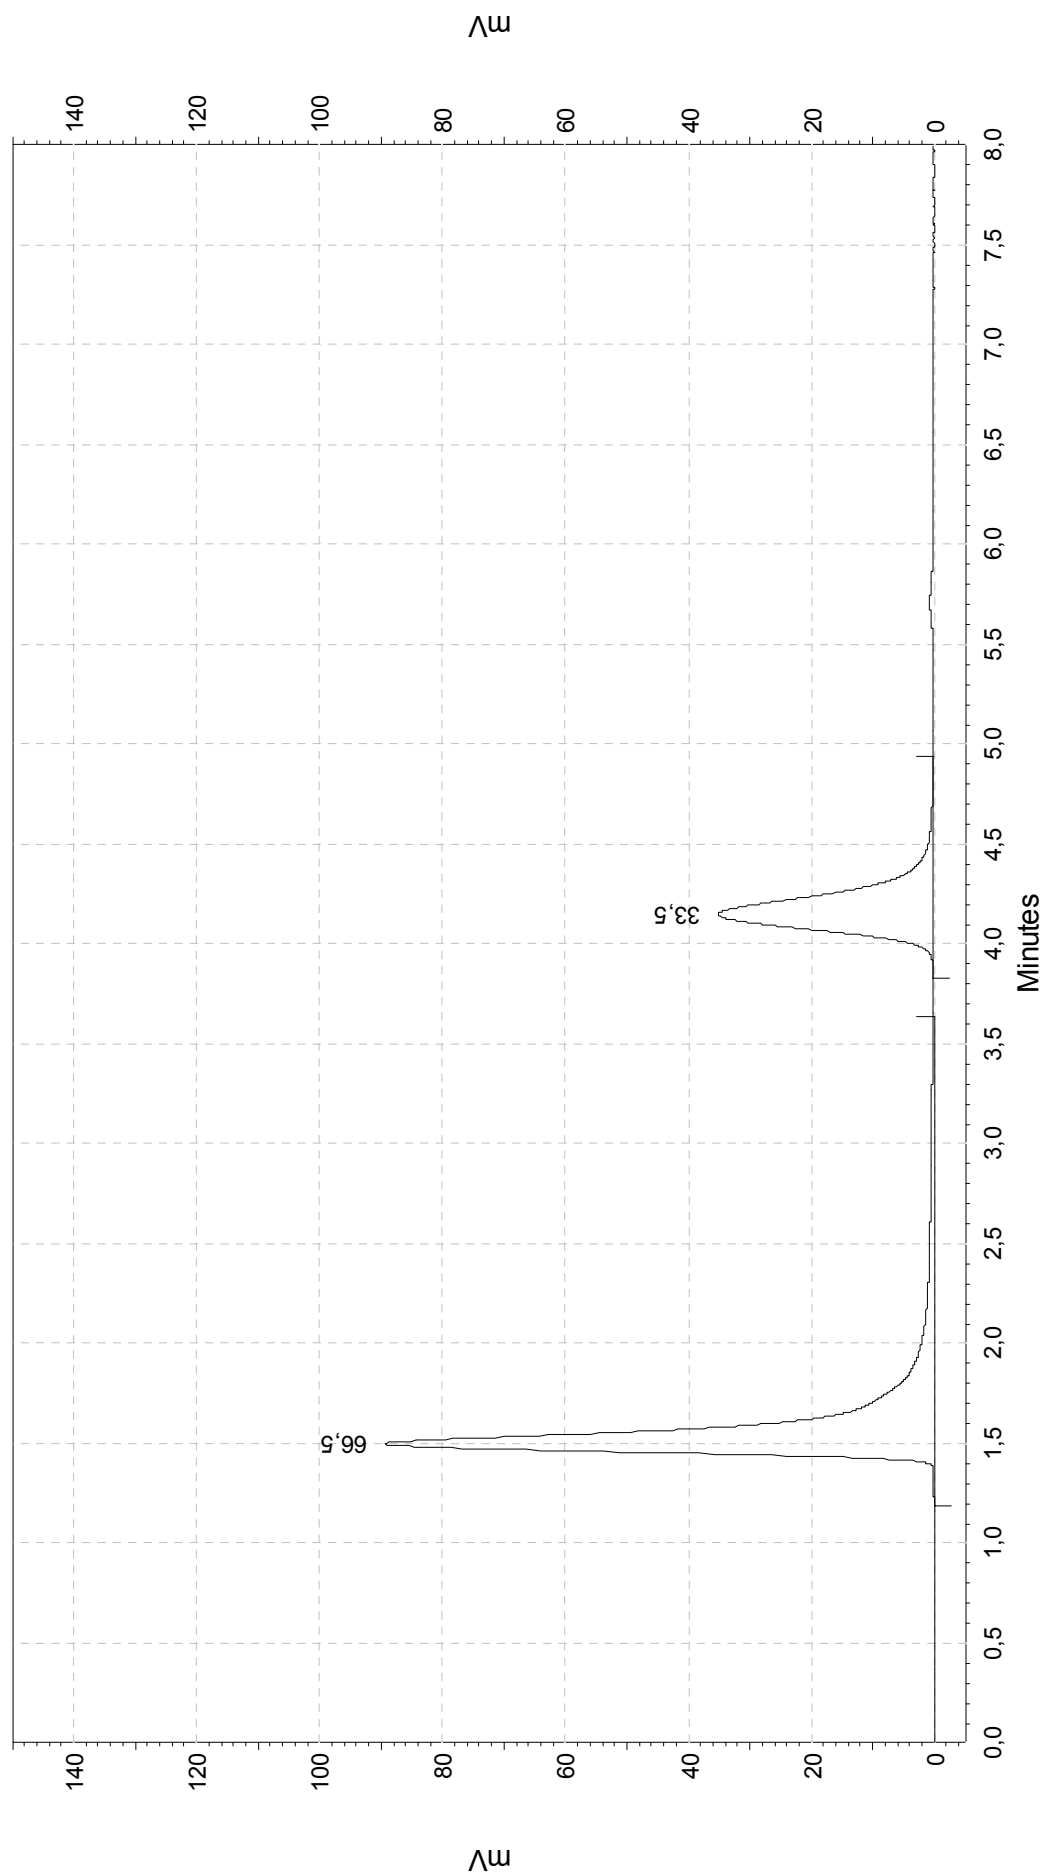

First measurement of three independent data for free CPT in tris buffer at pH=7.4  
t=290 min

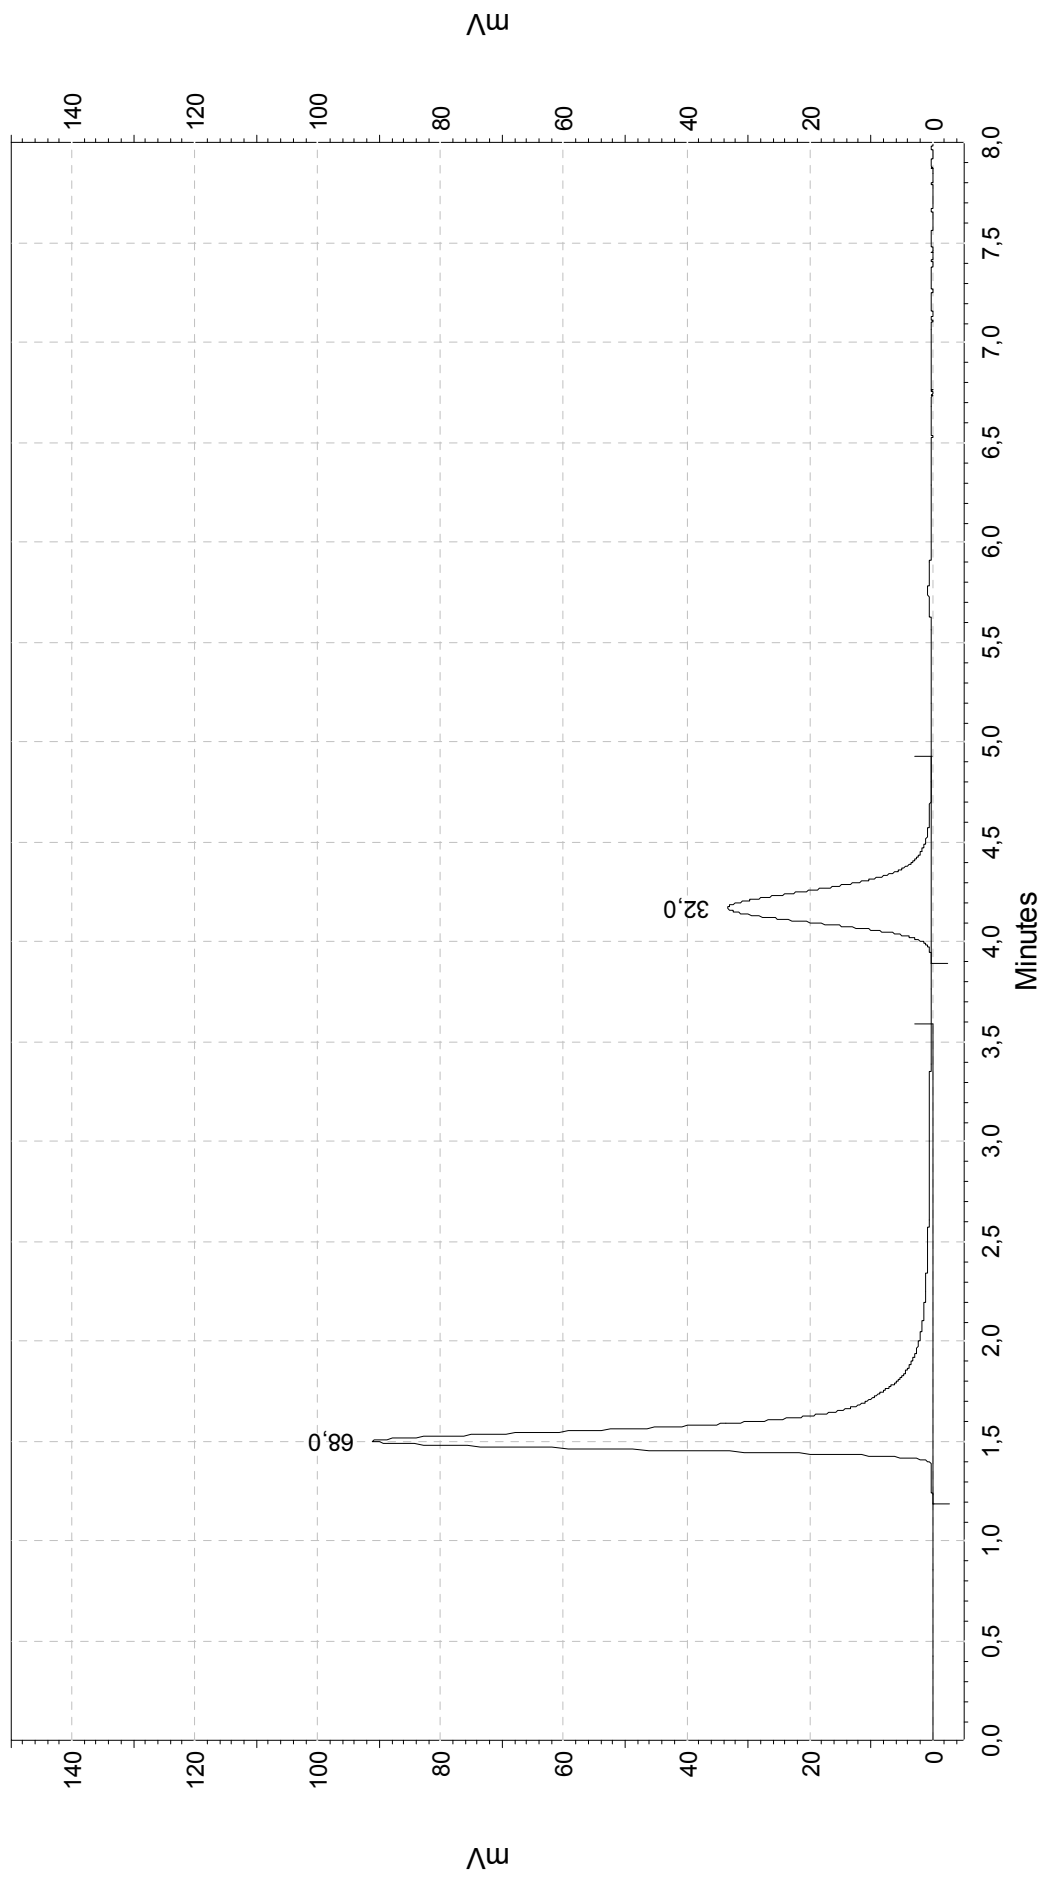

First measurement of three independent data for free CPT in tris buffer at pH=7.4  
t=310 min

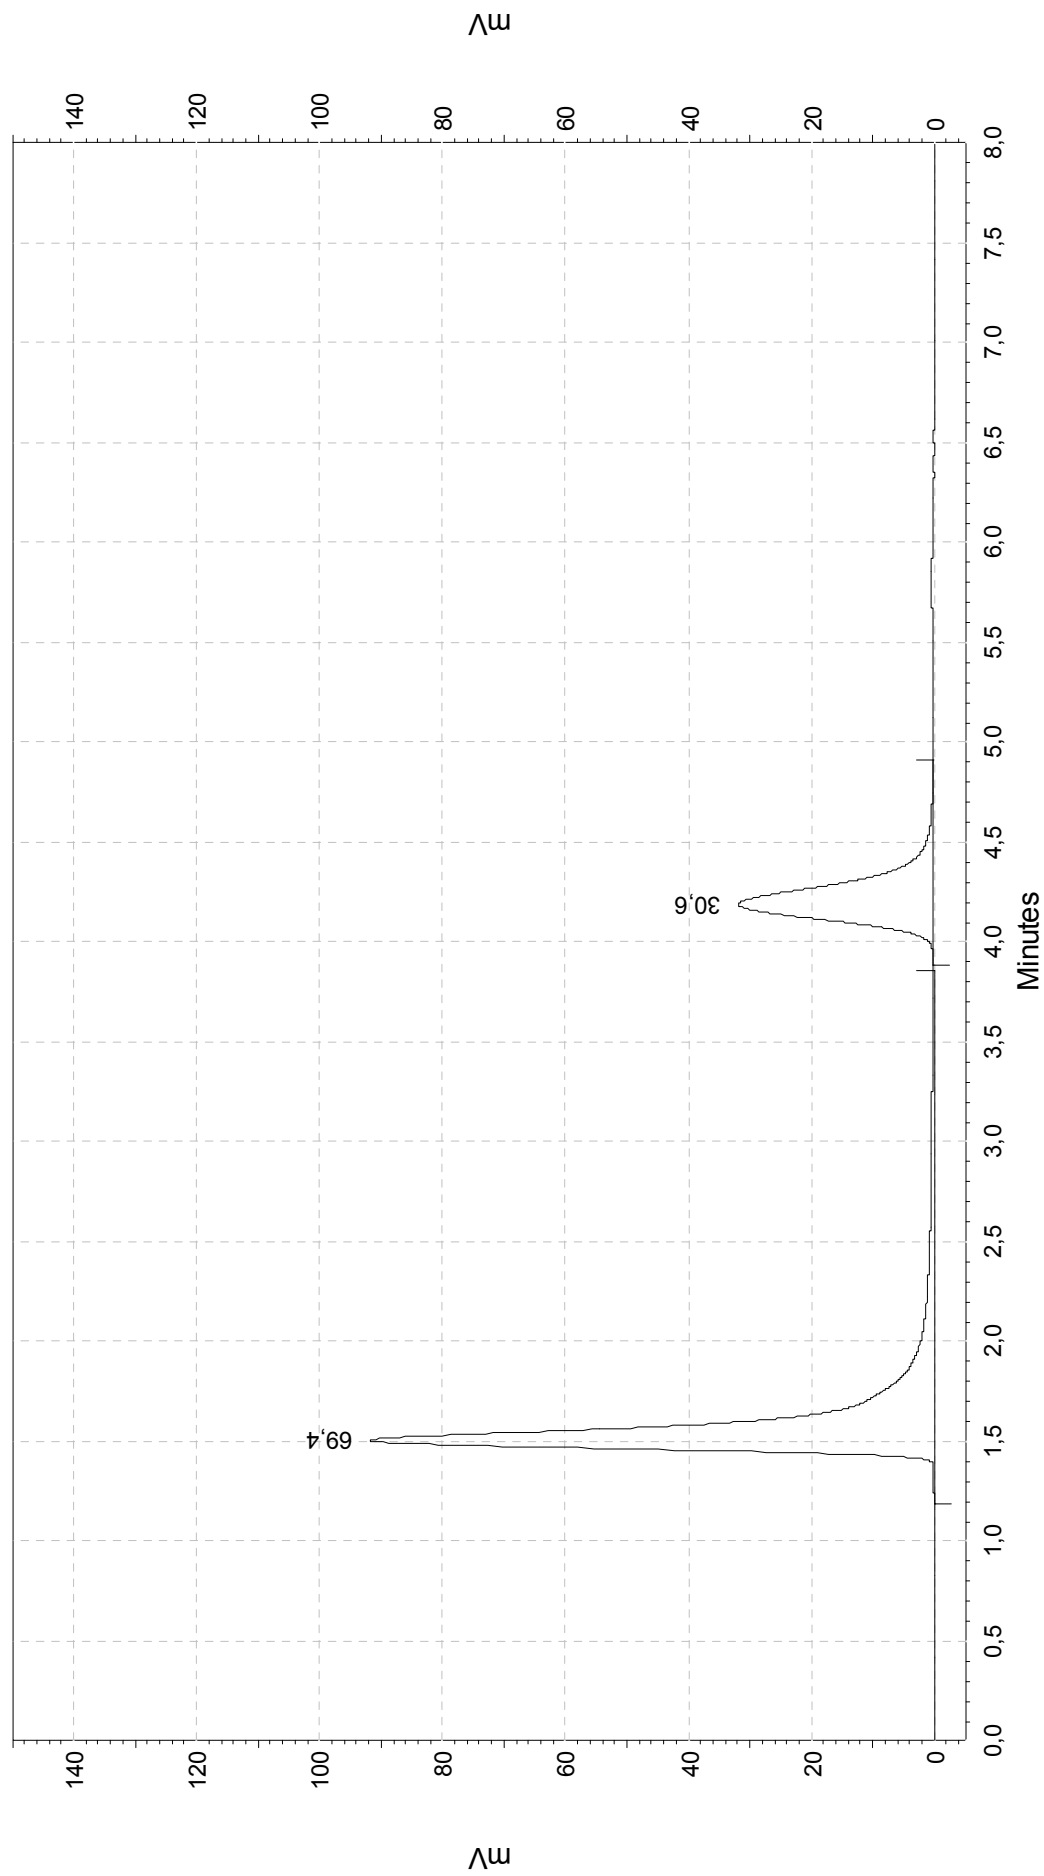

First measurement of three independent data for free TPT in tris buffer at pH=7.4  
t=0 min

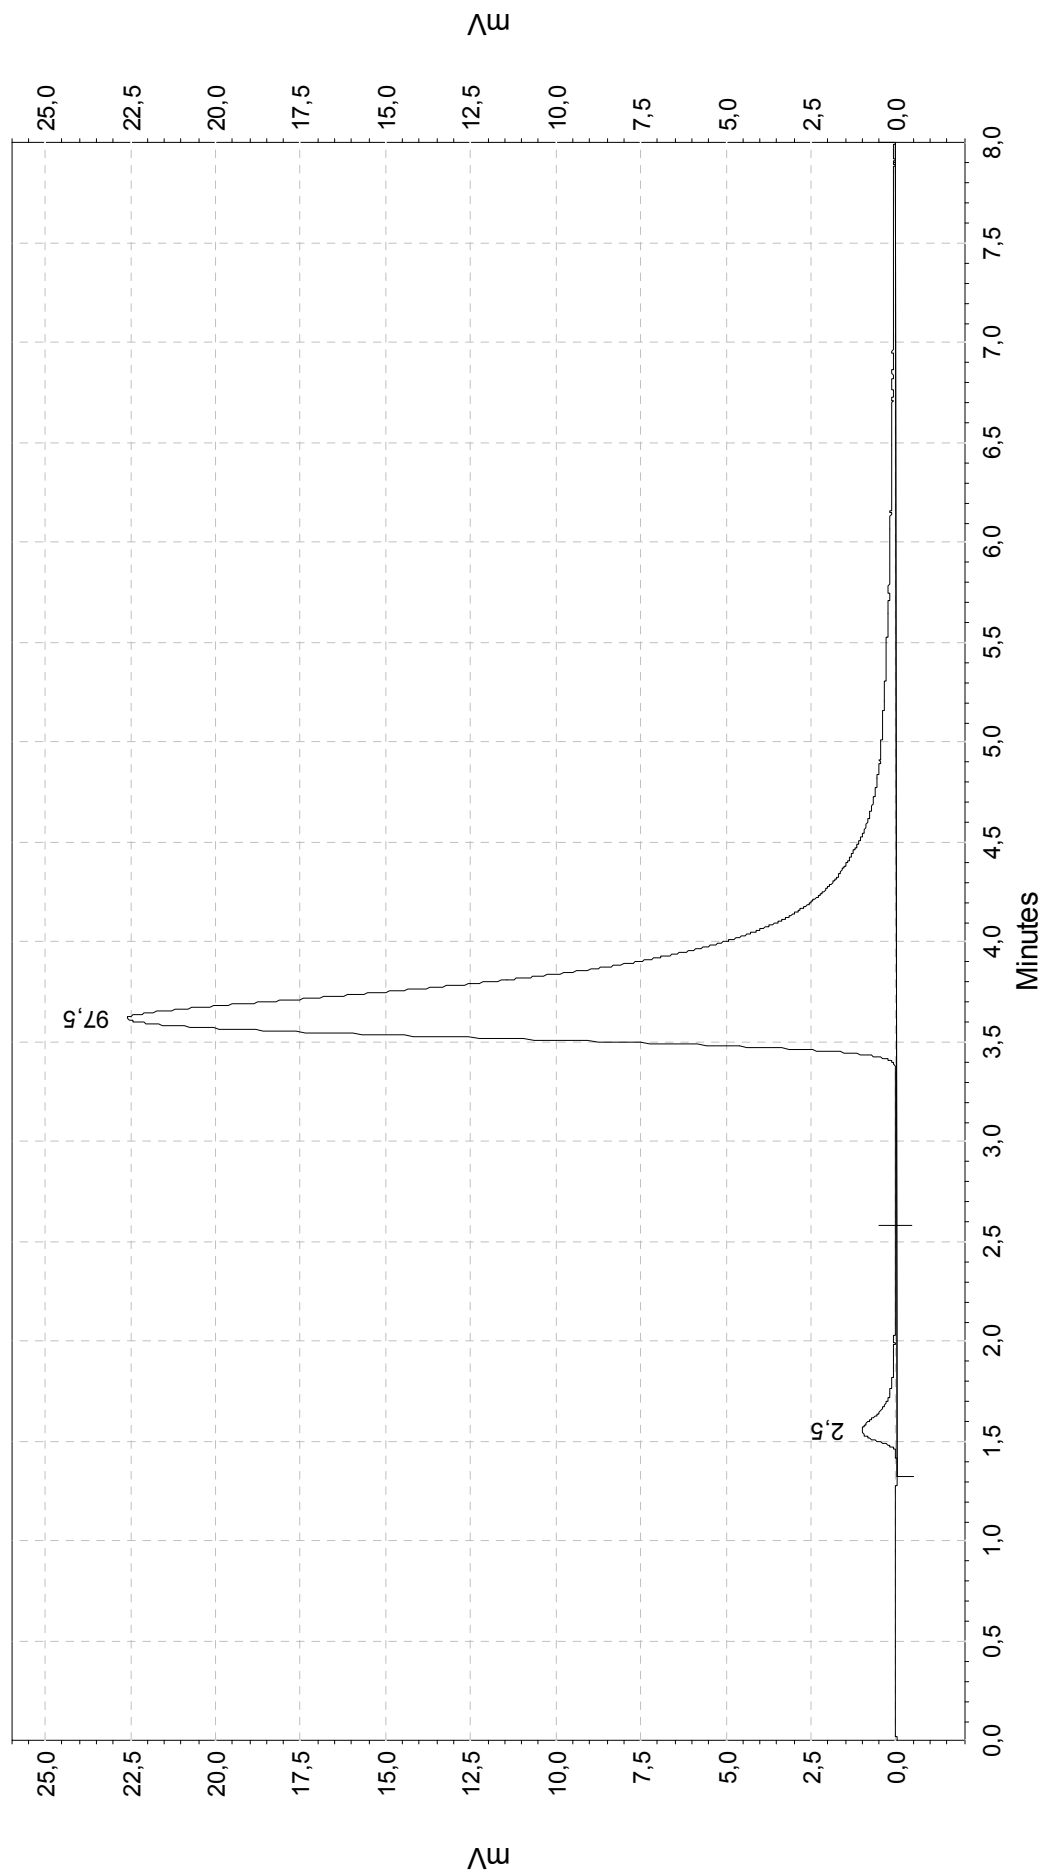



First measurement of three independent data for free TPT in tris buffer at pH=7.4  
t=20 min

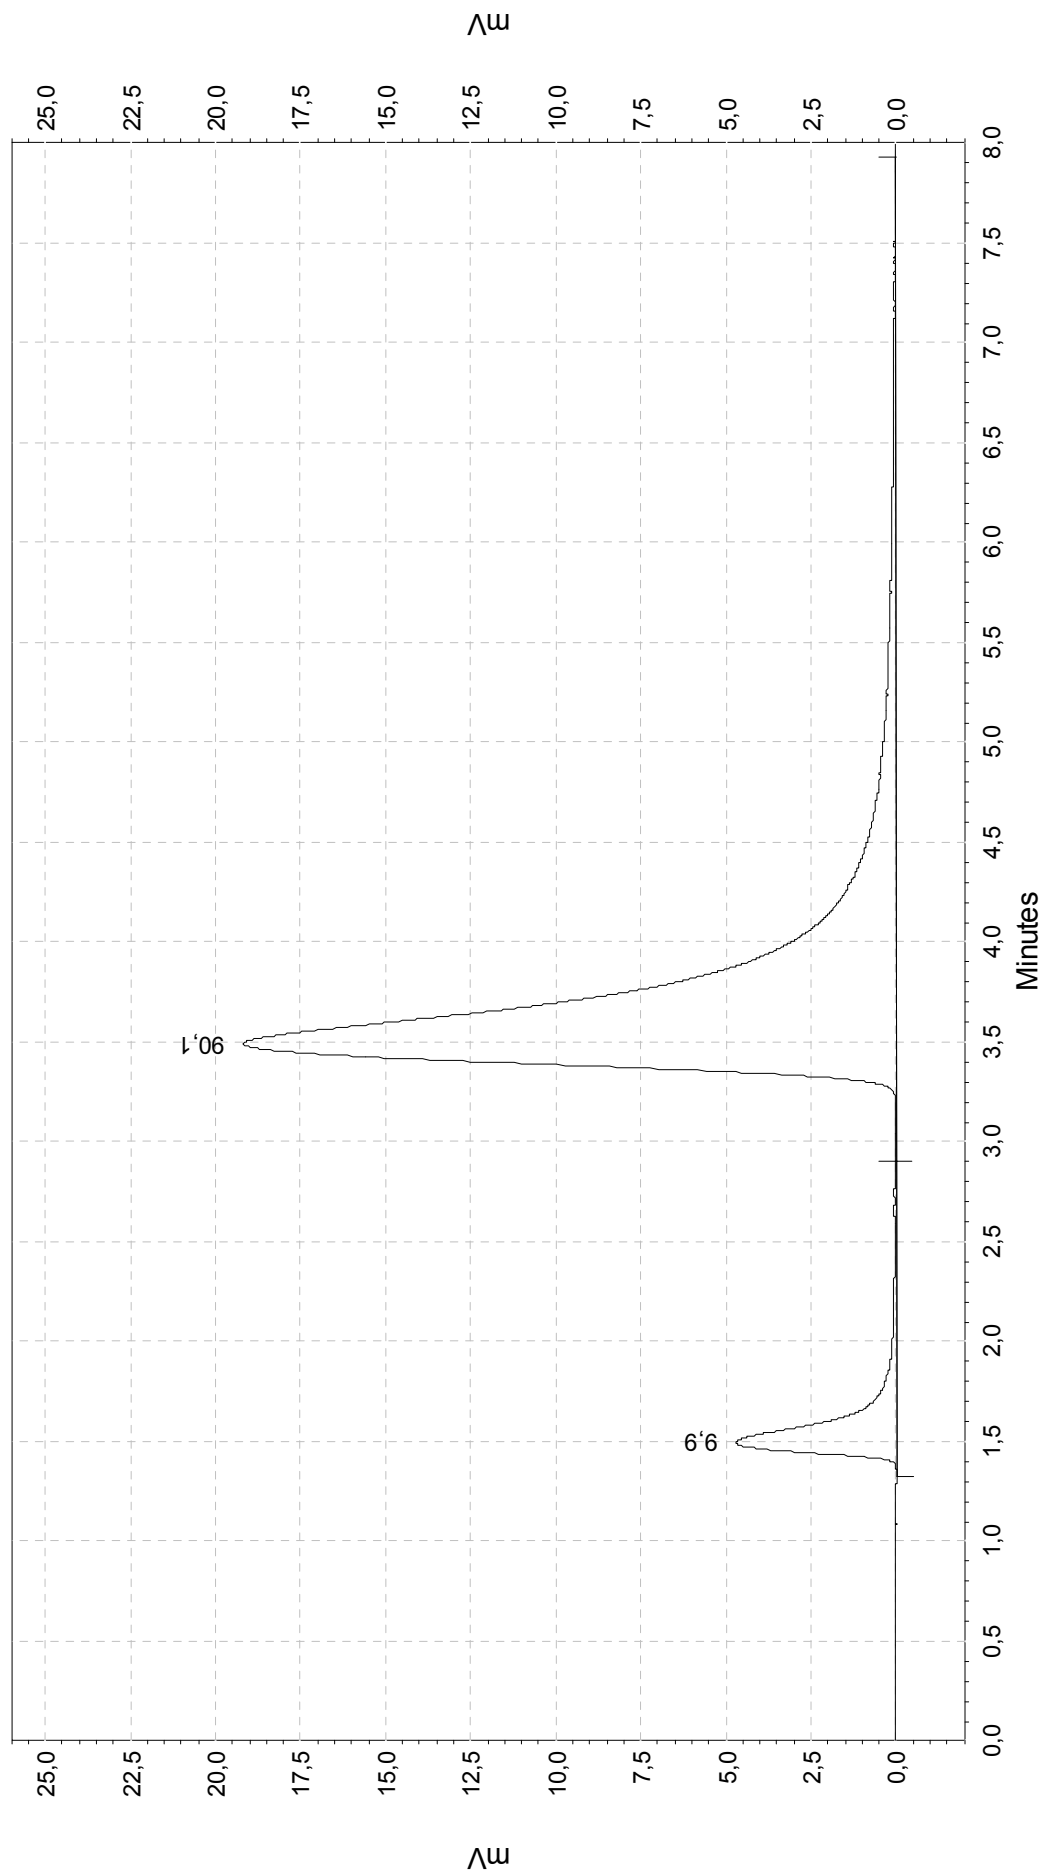

First measurement of three independent data for free TPT in tris buffer at pH=7.4  
t=39 min

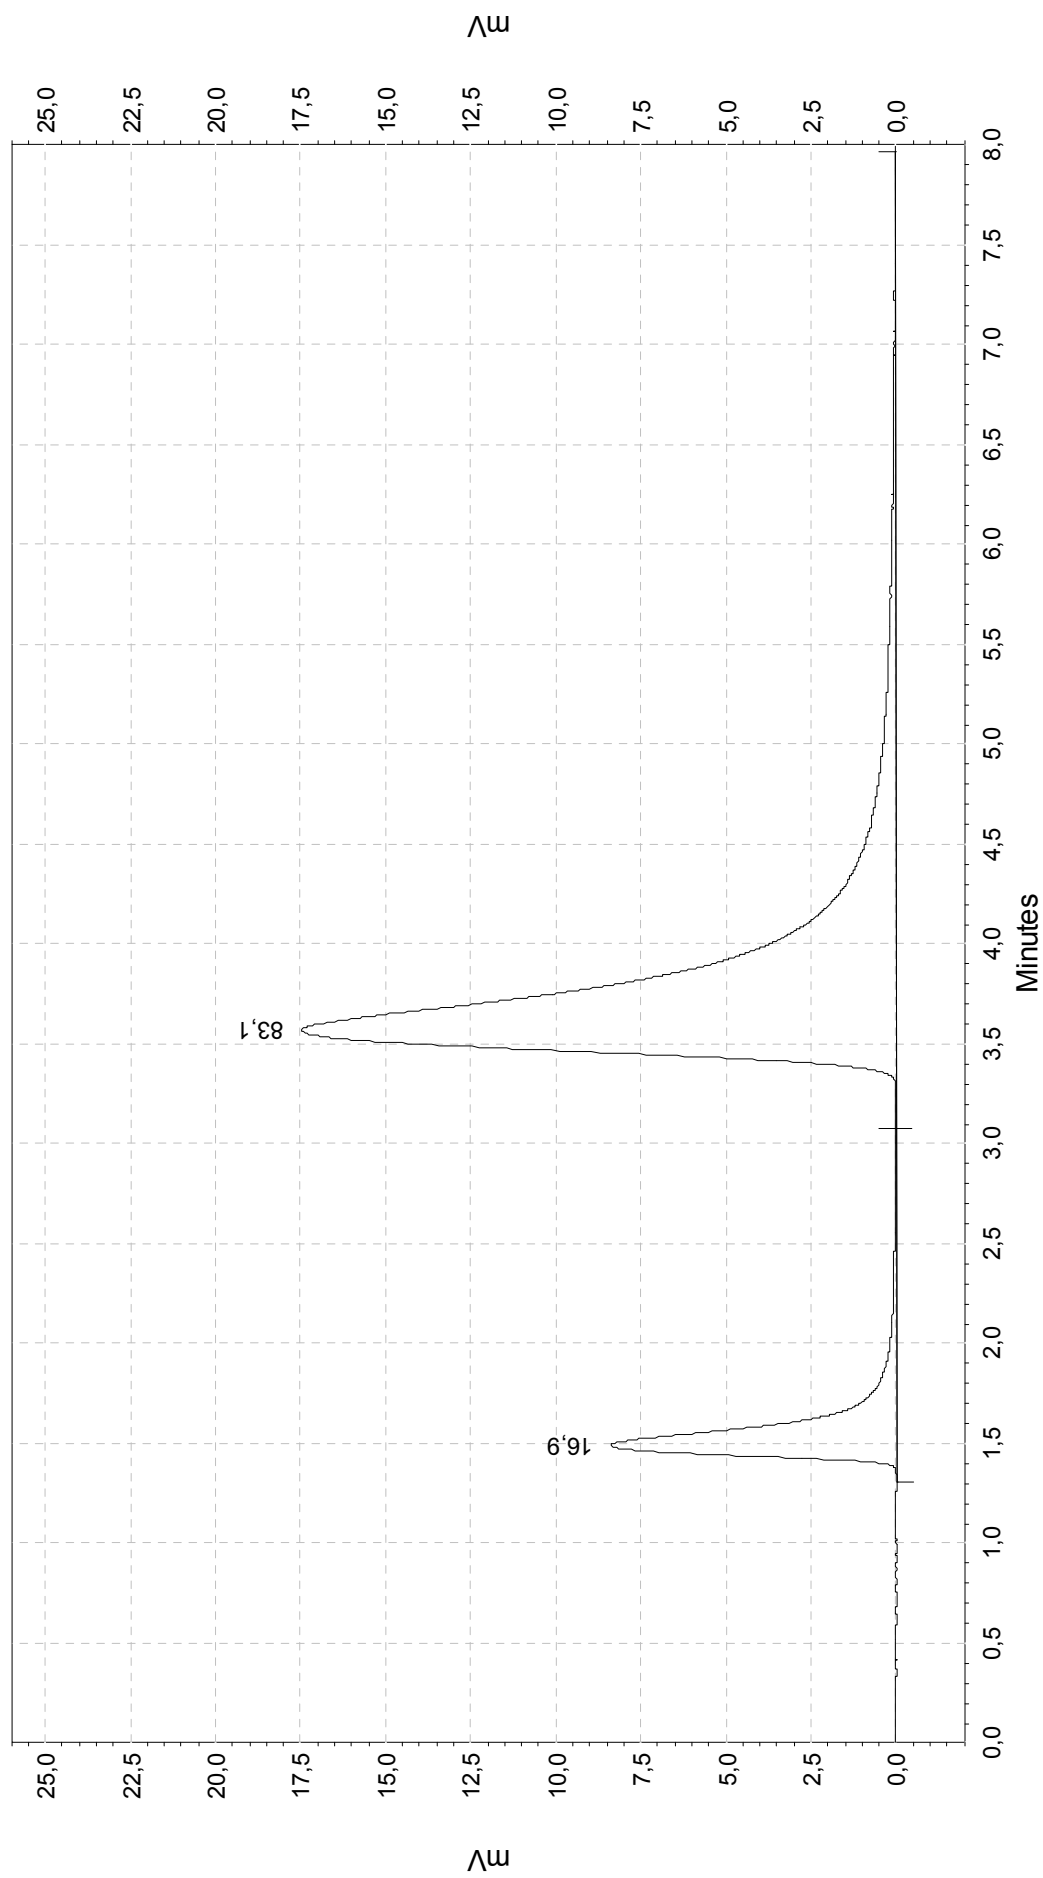

First measurement of three independent data for free TPT in tris buffer at pH=7.4  
t=58 min

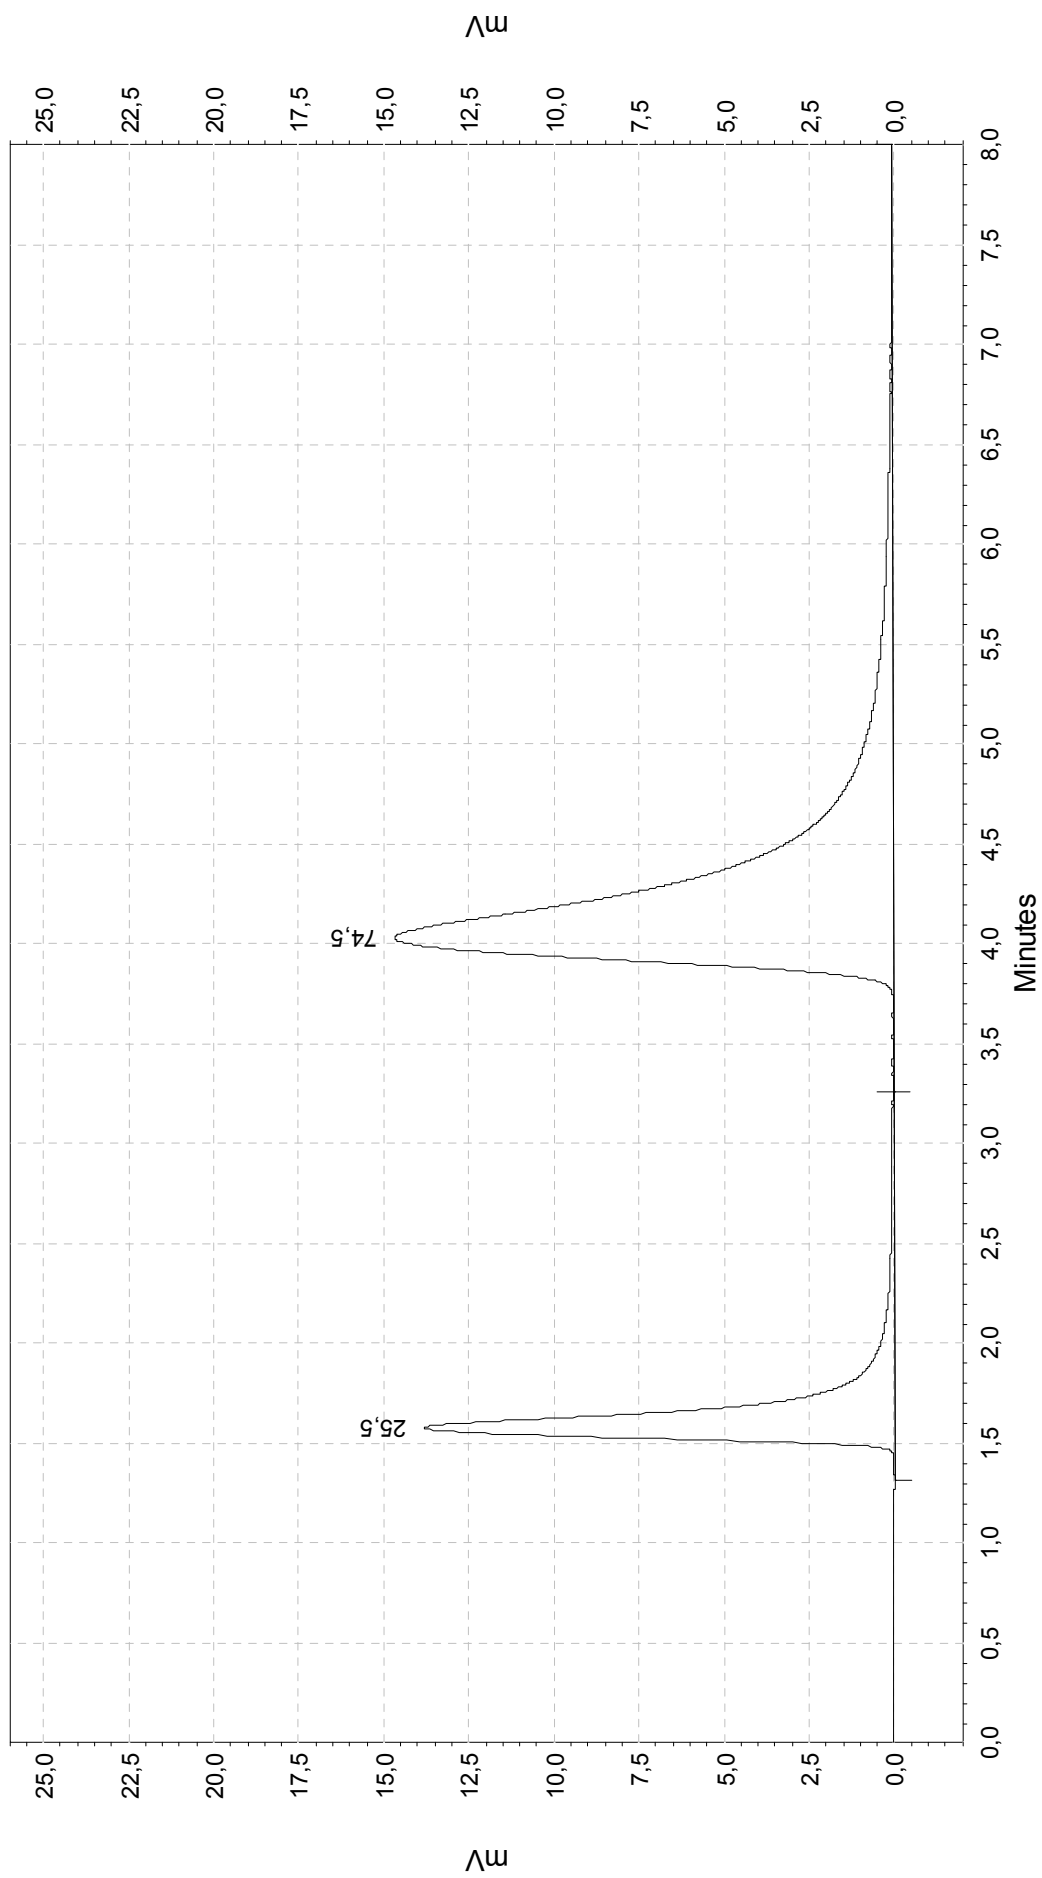

First measurement of three independent data for free TPT in tris buffer at pH=7.4  
t=78 min

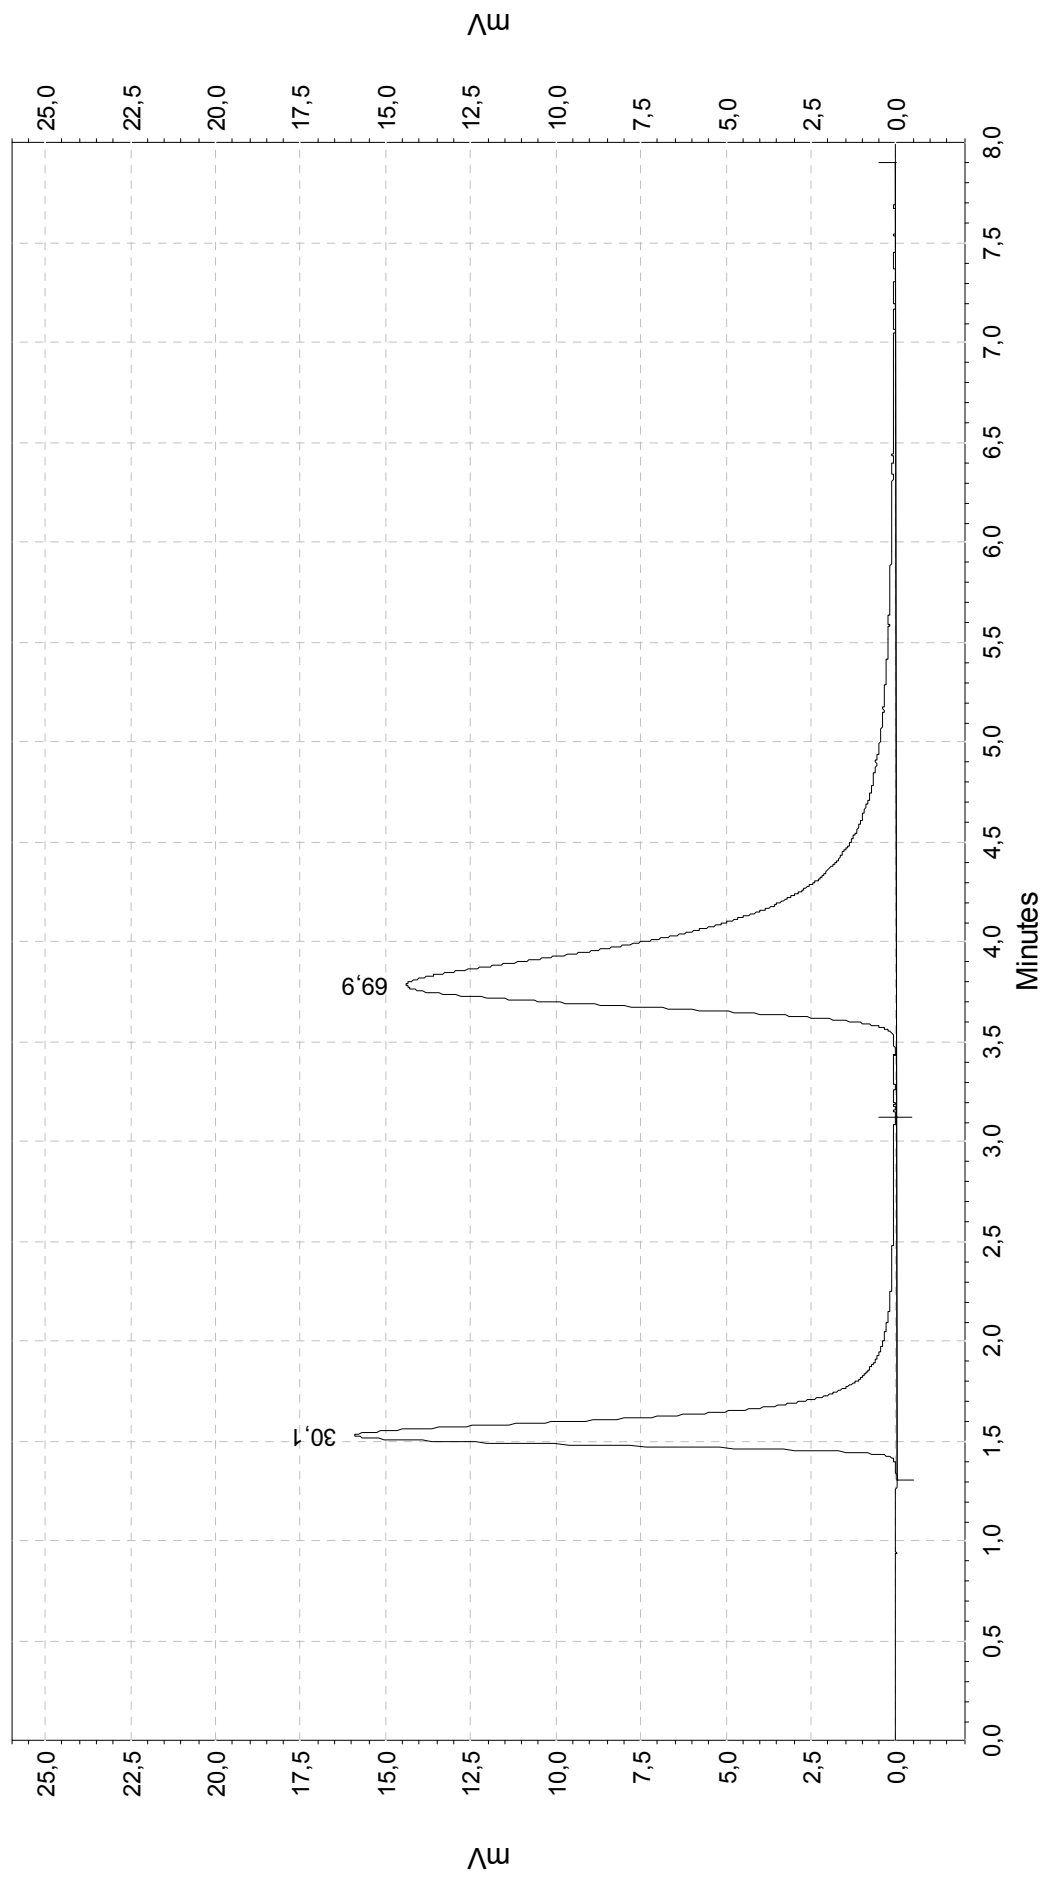

First measurement of three independent data for free TPT in tris buffer at pH=7.4  
t=97 min

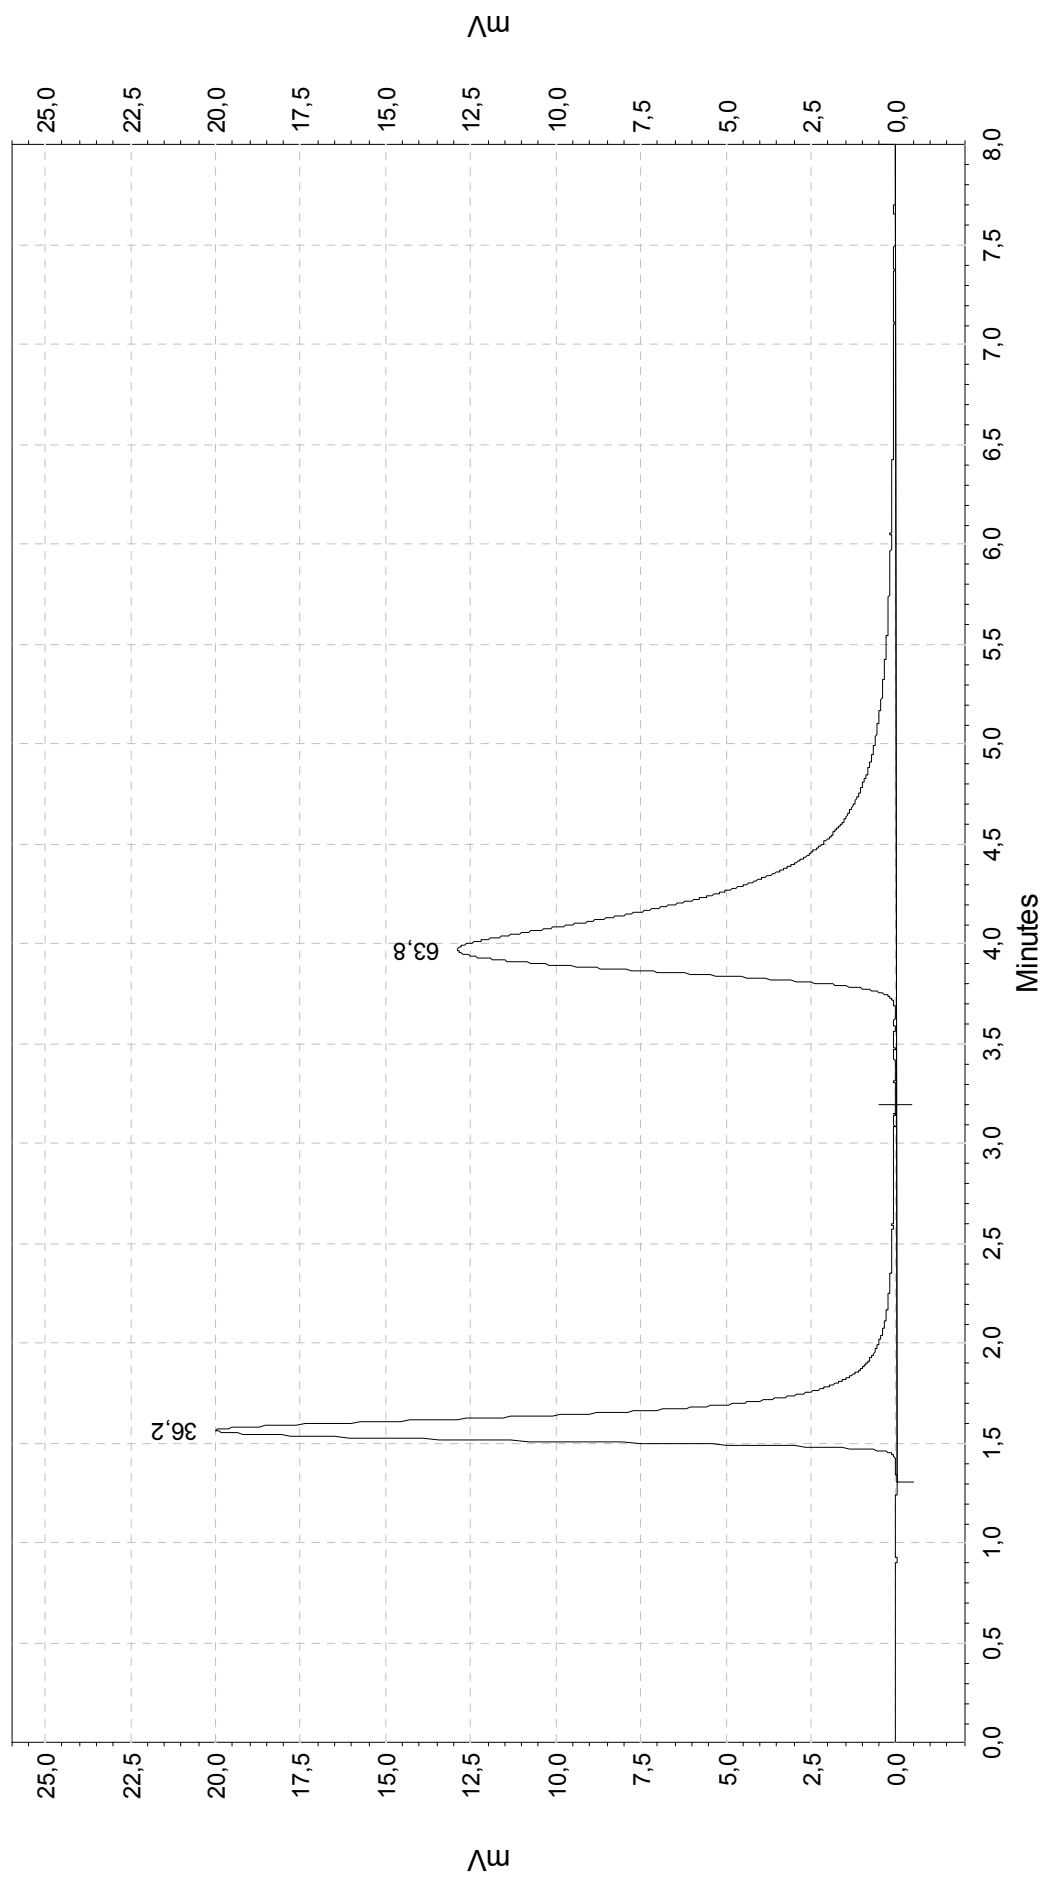

First measurement of three independent data for free TPT in tris buffer at pH=7.4  
t=117 min

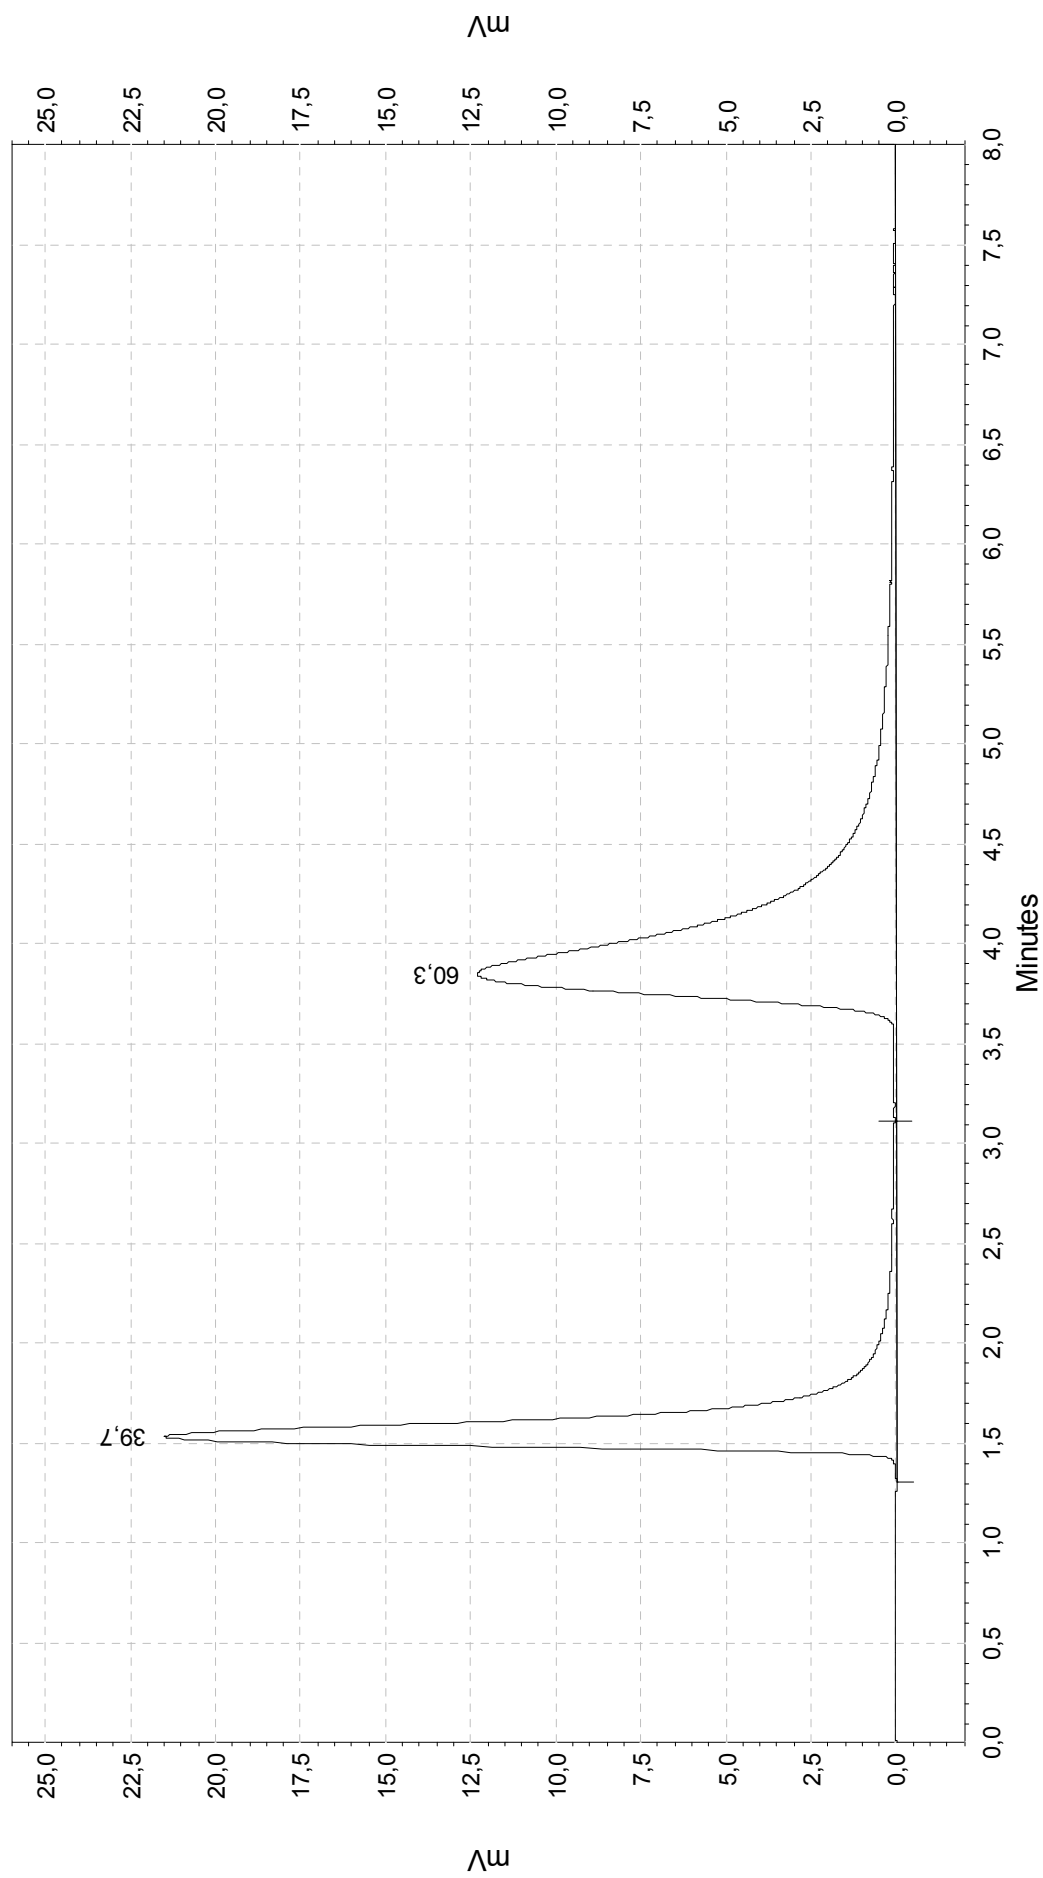

First measurement of three independent data for free TPT in tris buffer at pH=7.4  
t=136 min

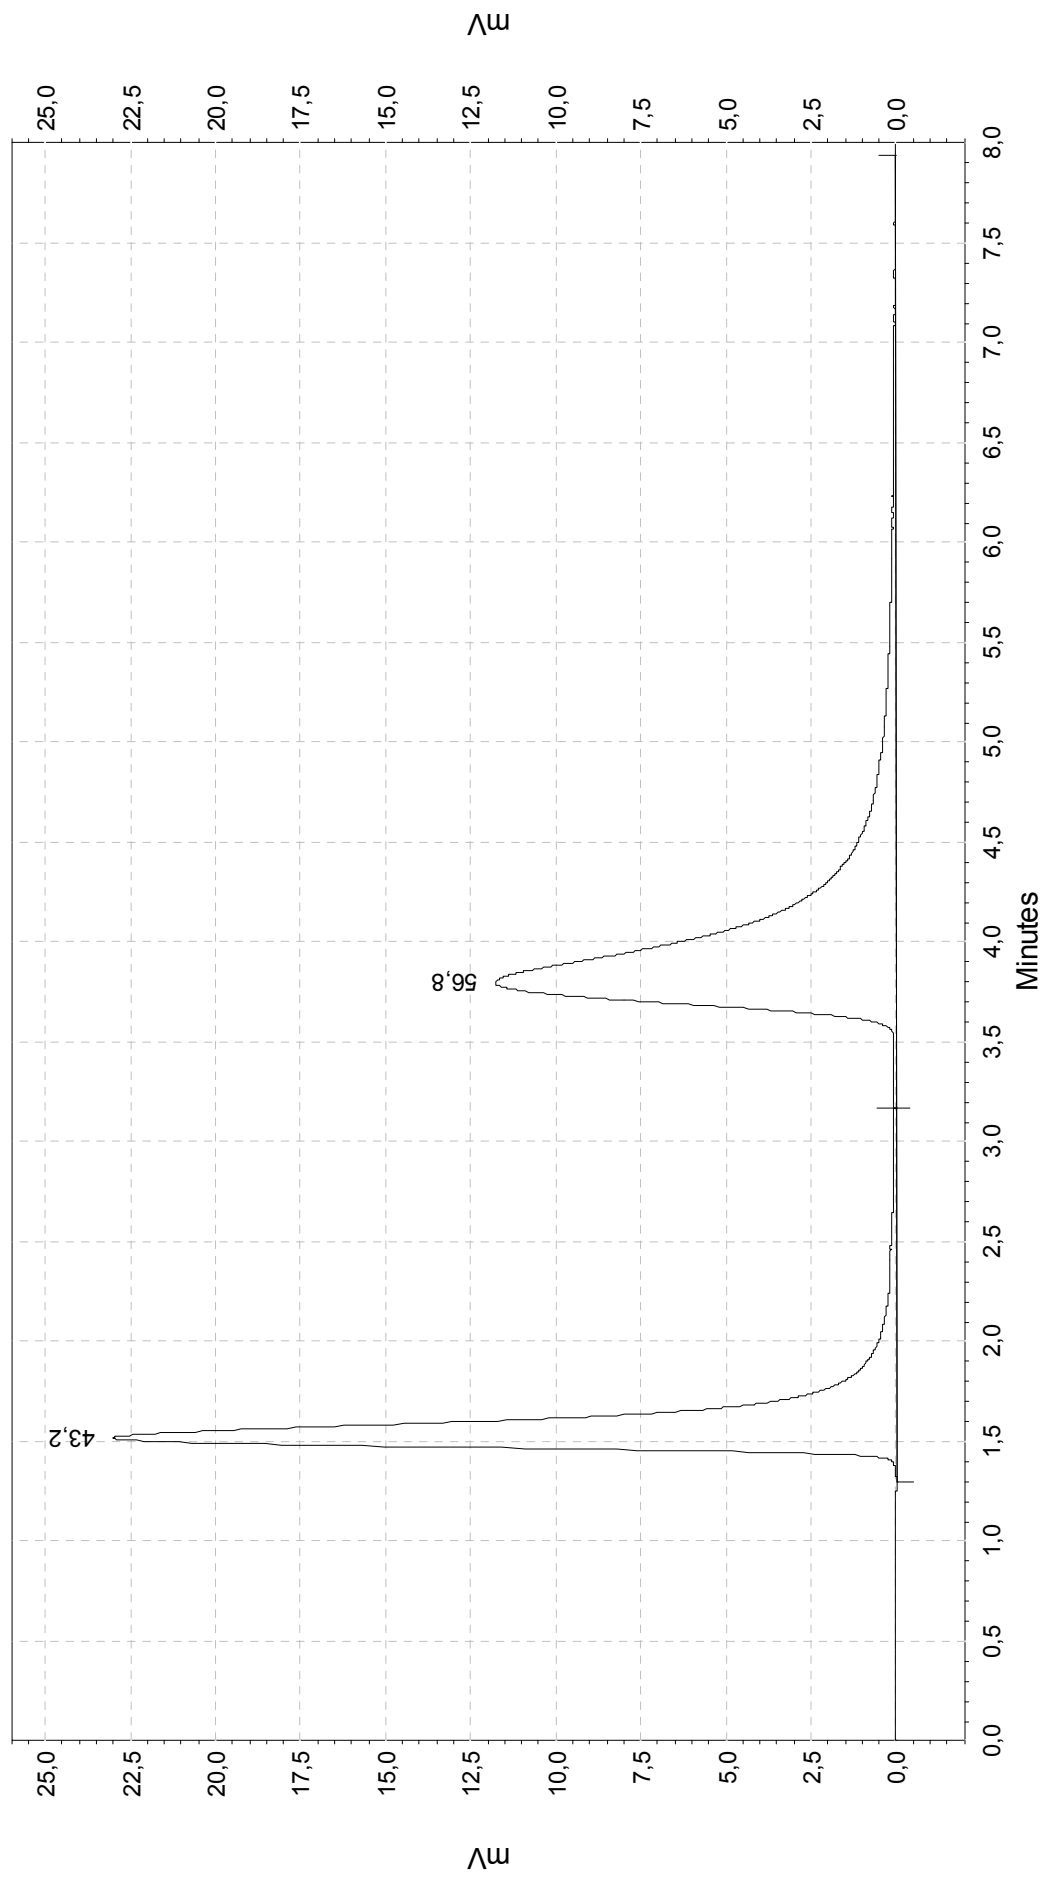

First measurement of three independent data for free TPT in tris buffer at pH=7.4  
t=155 min

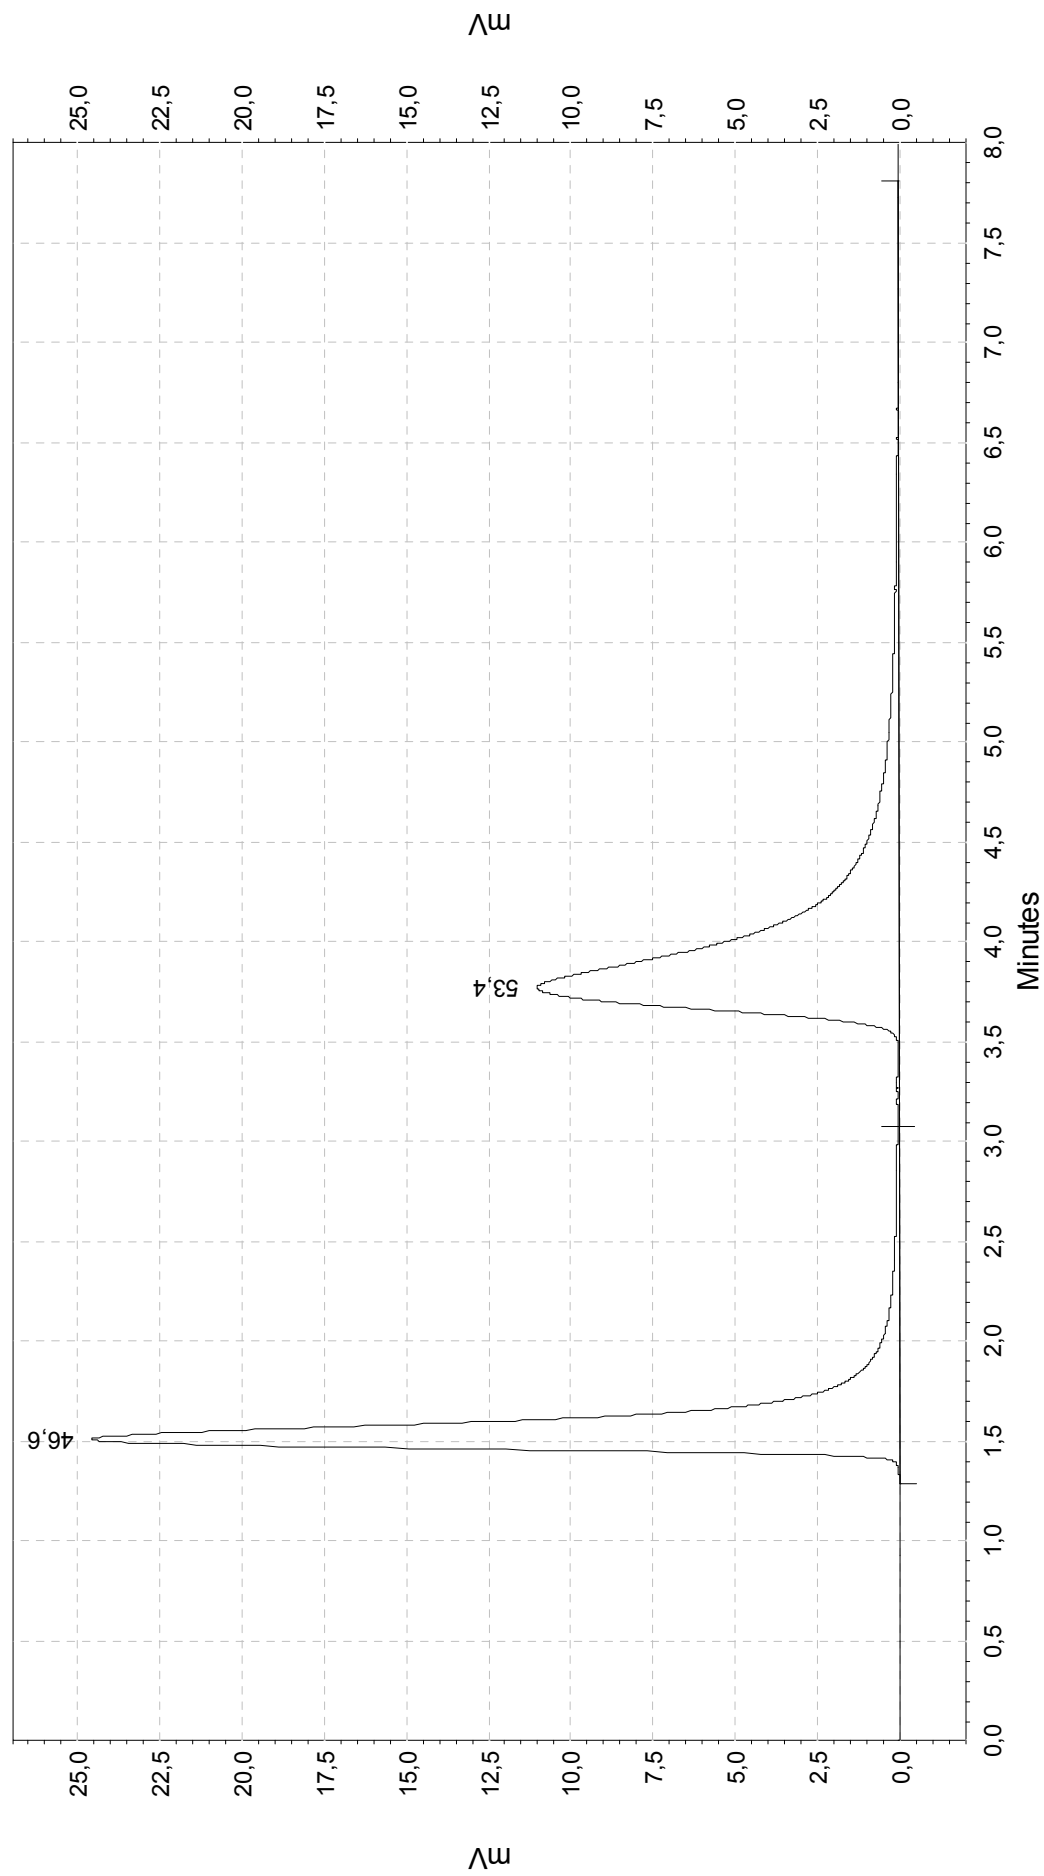



First measurement of three independent data for free TPT in tris buffer at pH=7.4  
t=175 min

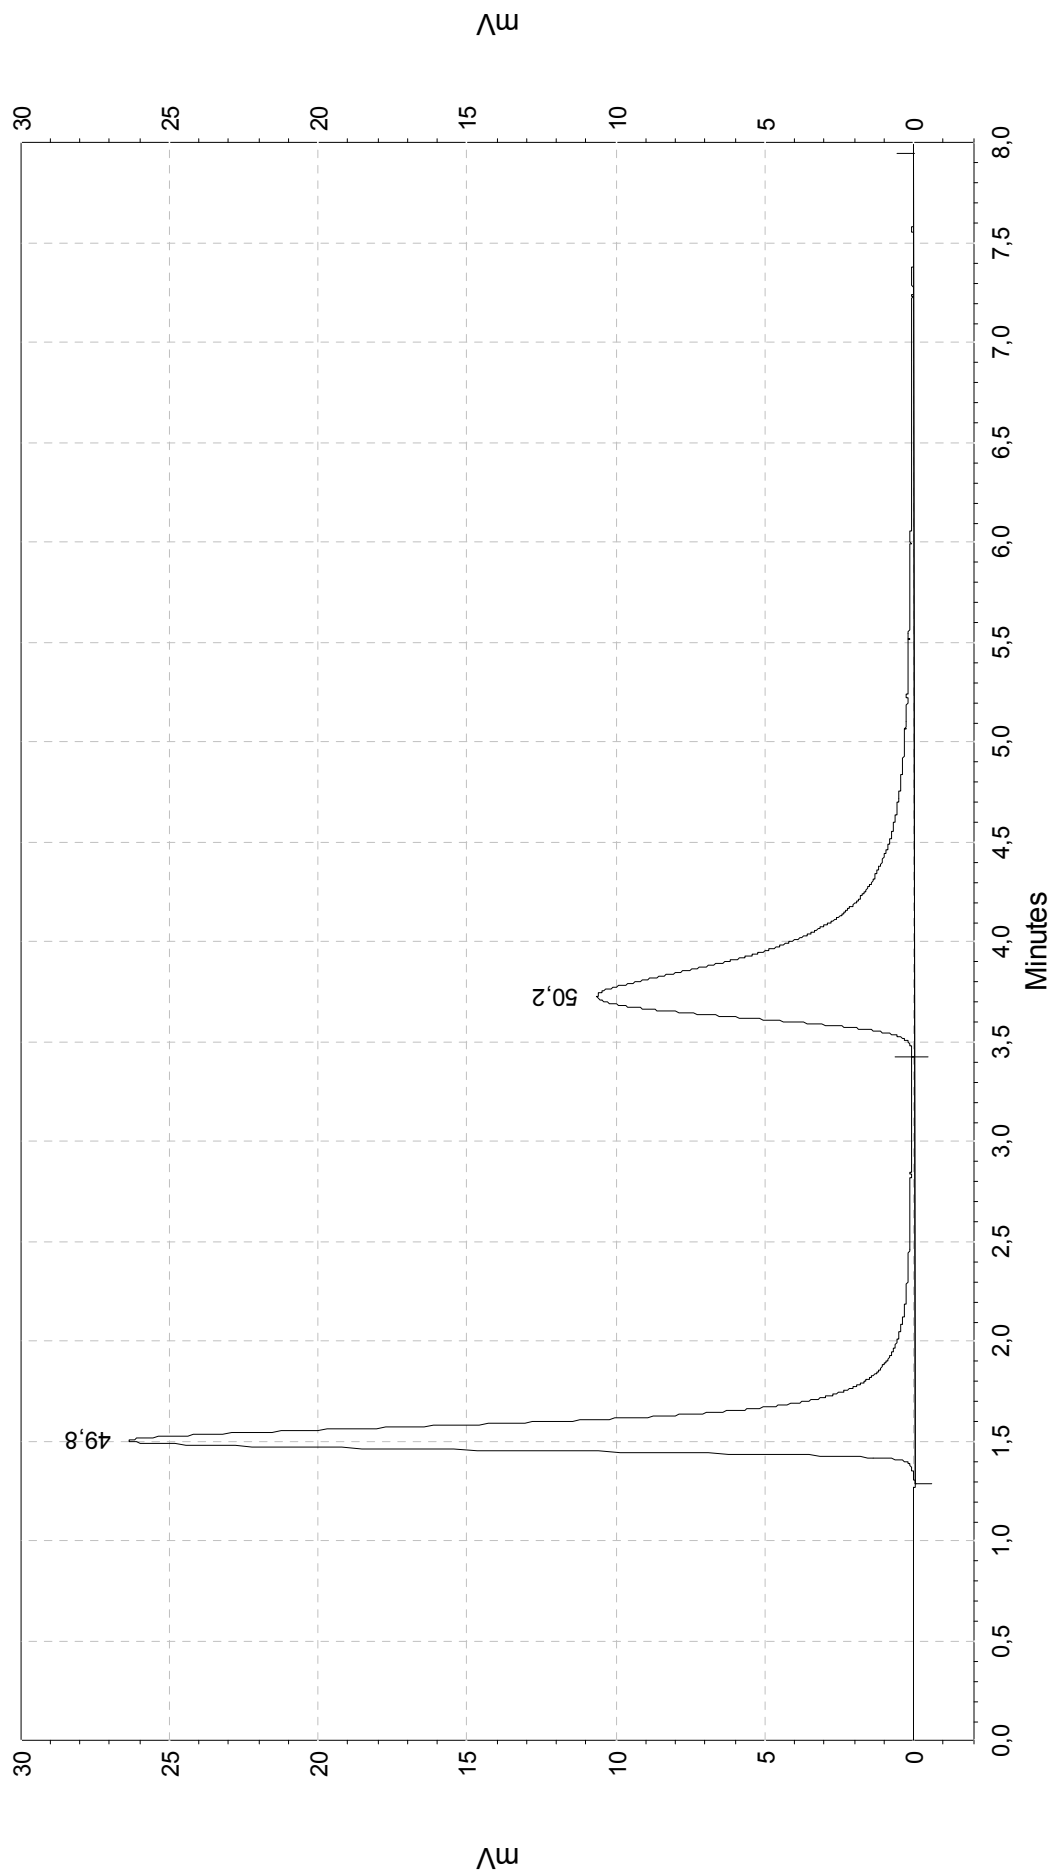

First measurement of three independent data for free TPT in tris buffer at pH=7.4  
t=194 min

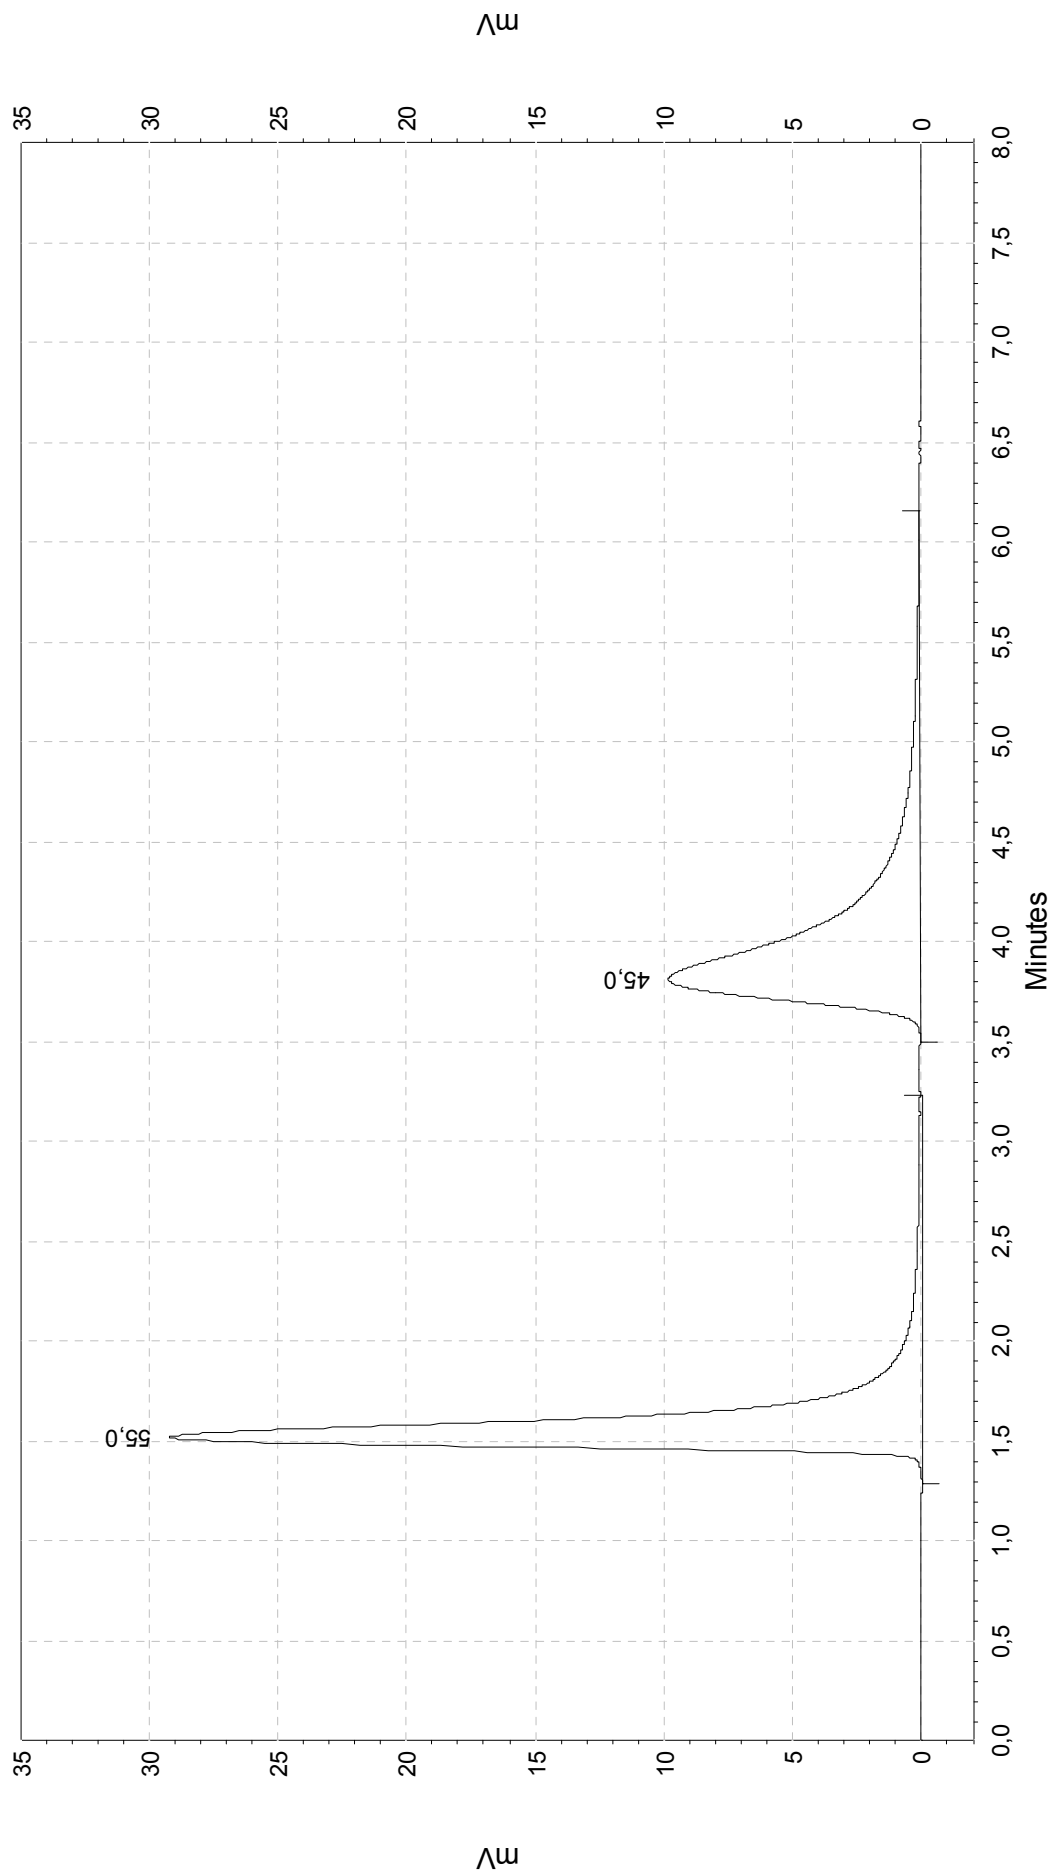

First measurement of three independent data for free TPT in tris buffer at pH=7.4  
t=213 min

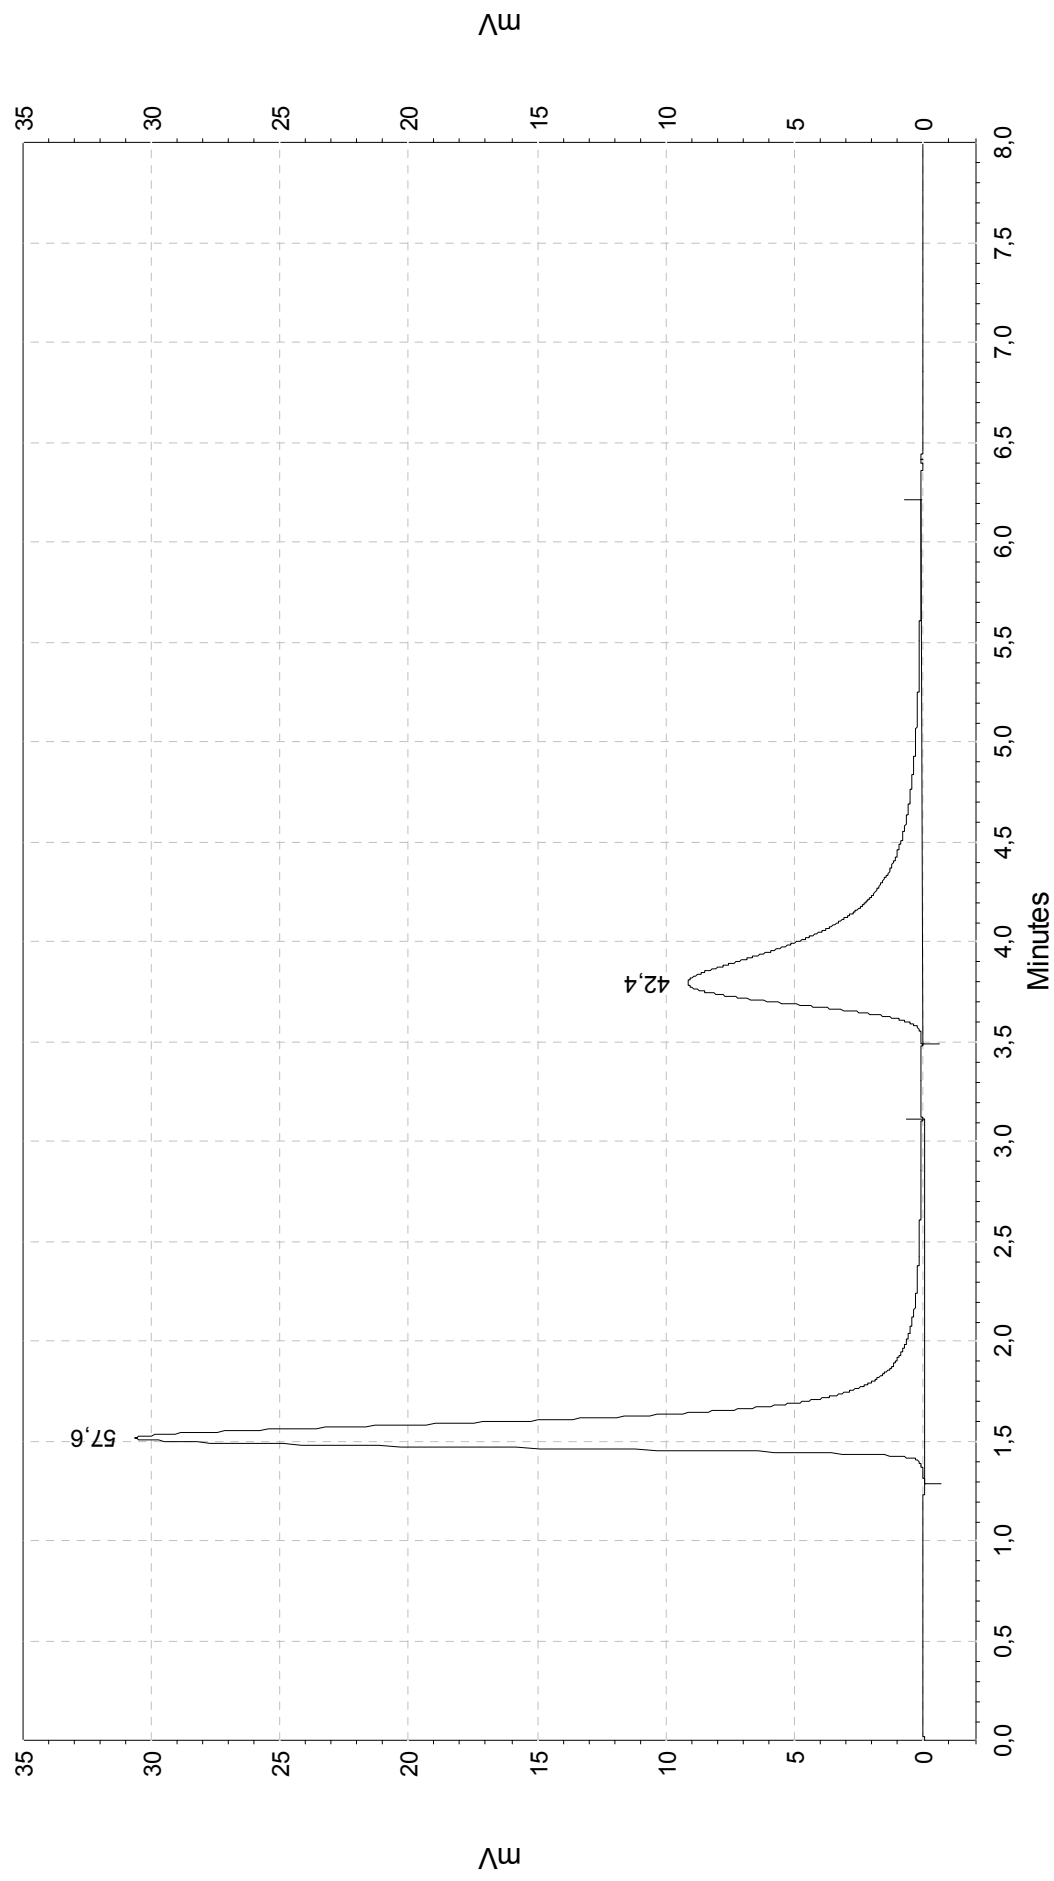

First measurement of three independent data for free TPT in tris buffer at pH=7.4  
t=232 min

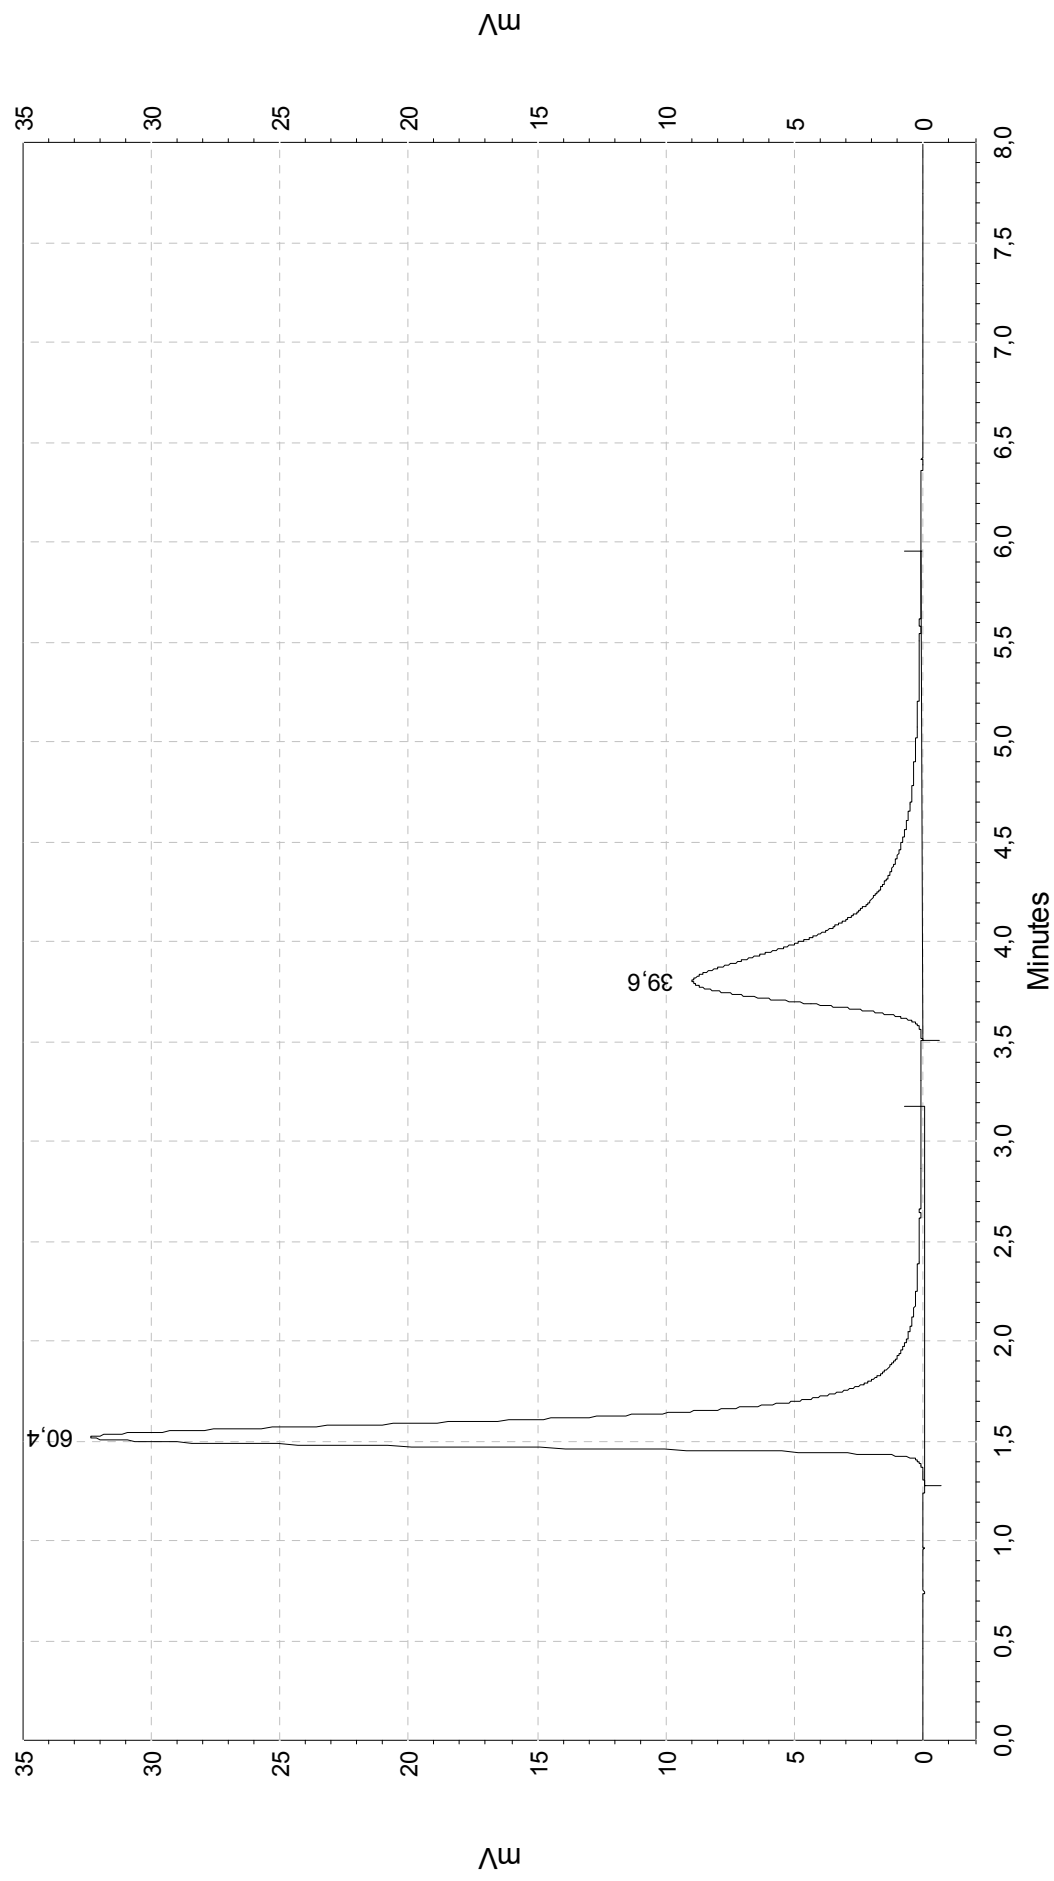

First measurement of three independent data for free TPT in tris buffer at pH=7.4  
t=252 min

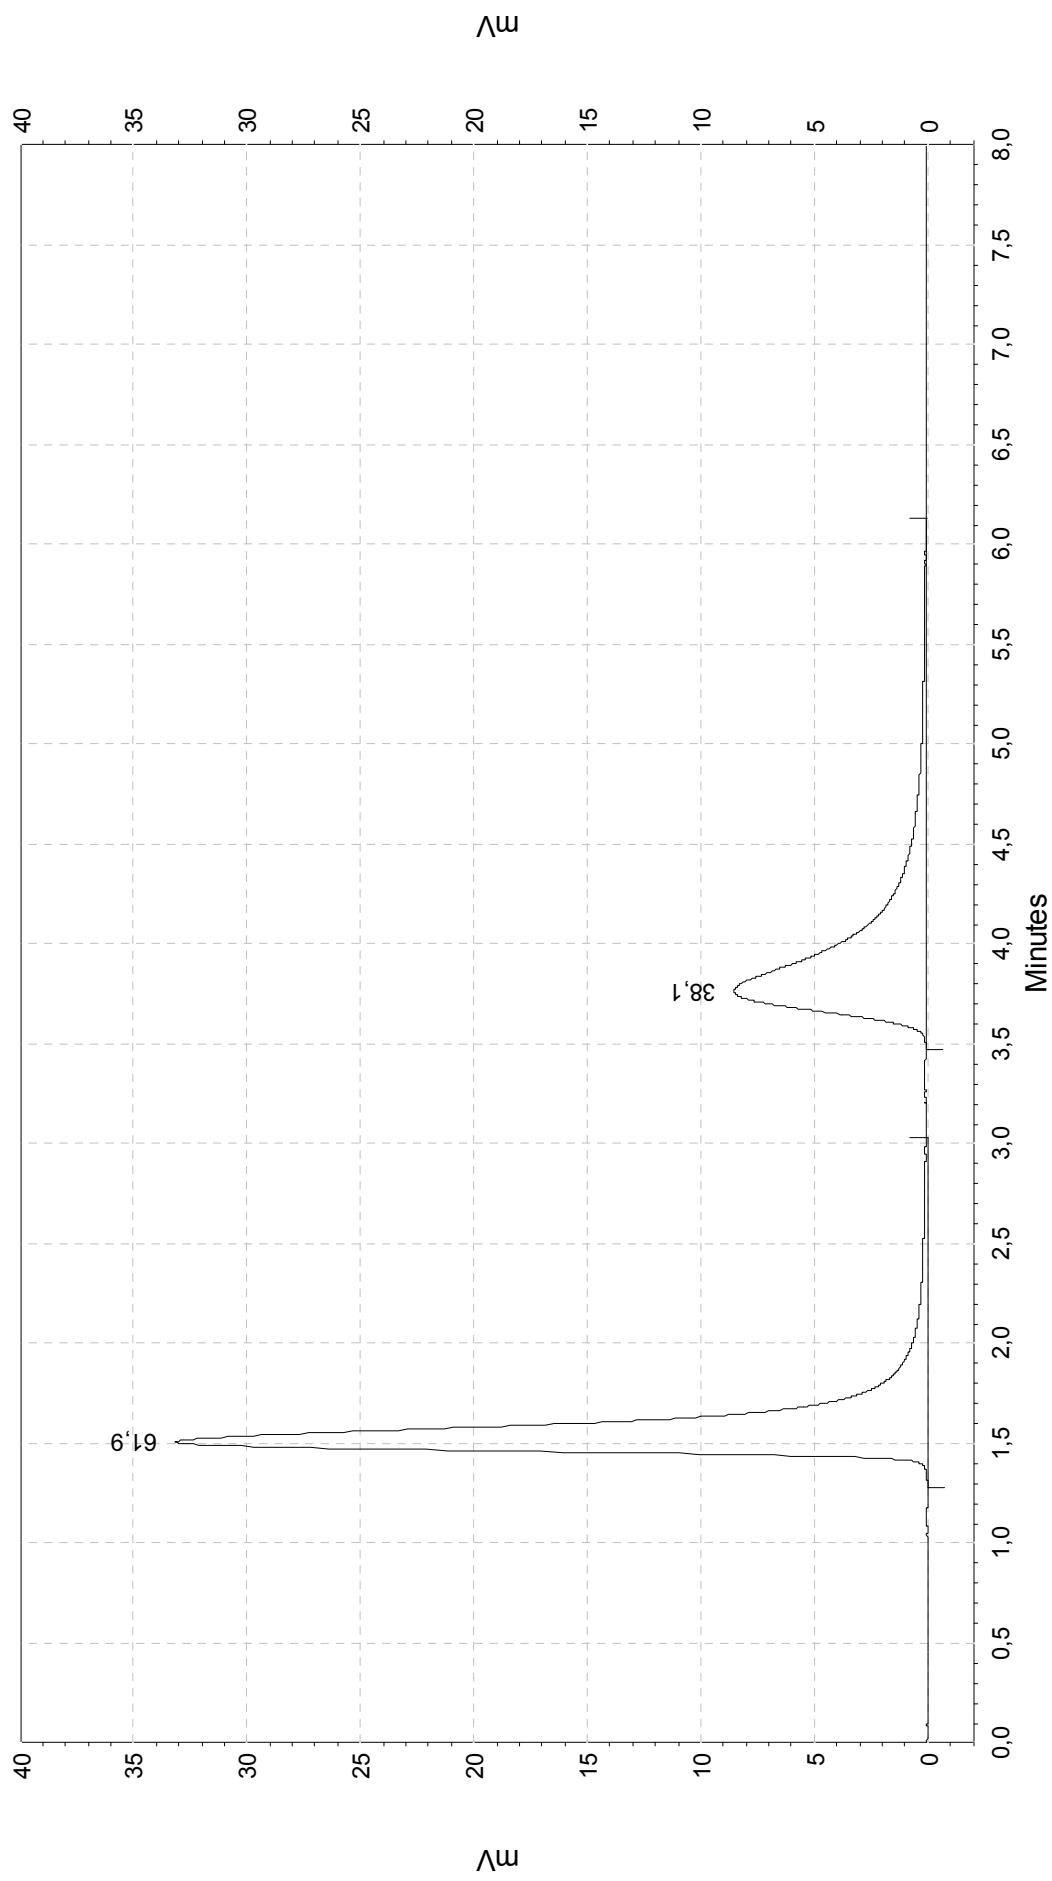

First measurement of three independent data for free TPT in tris buffer at pH=7.4  
t=271 min

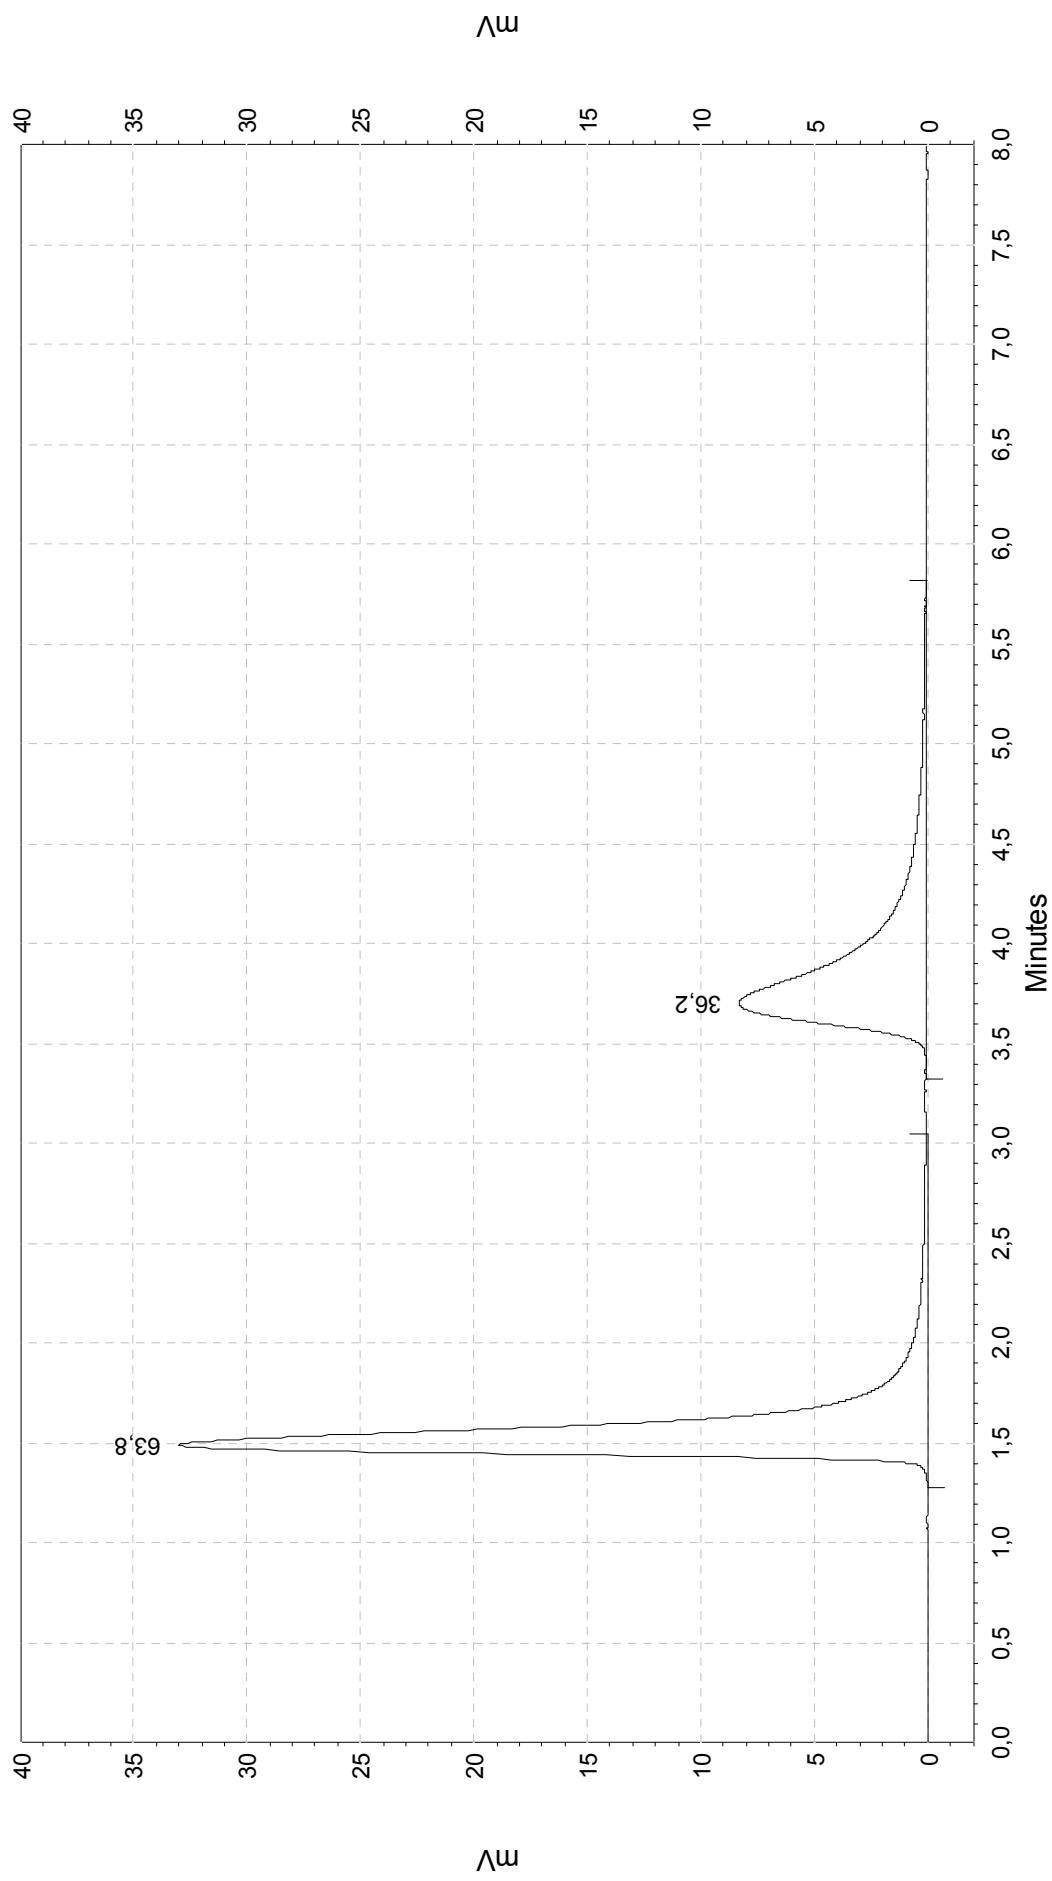

First measurement of three independent data for free TPT in tris buffer at pH=7.4  
t=290 min

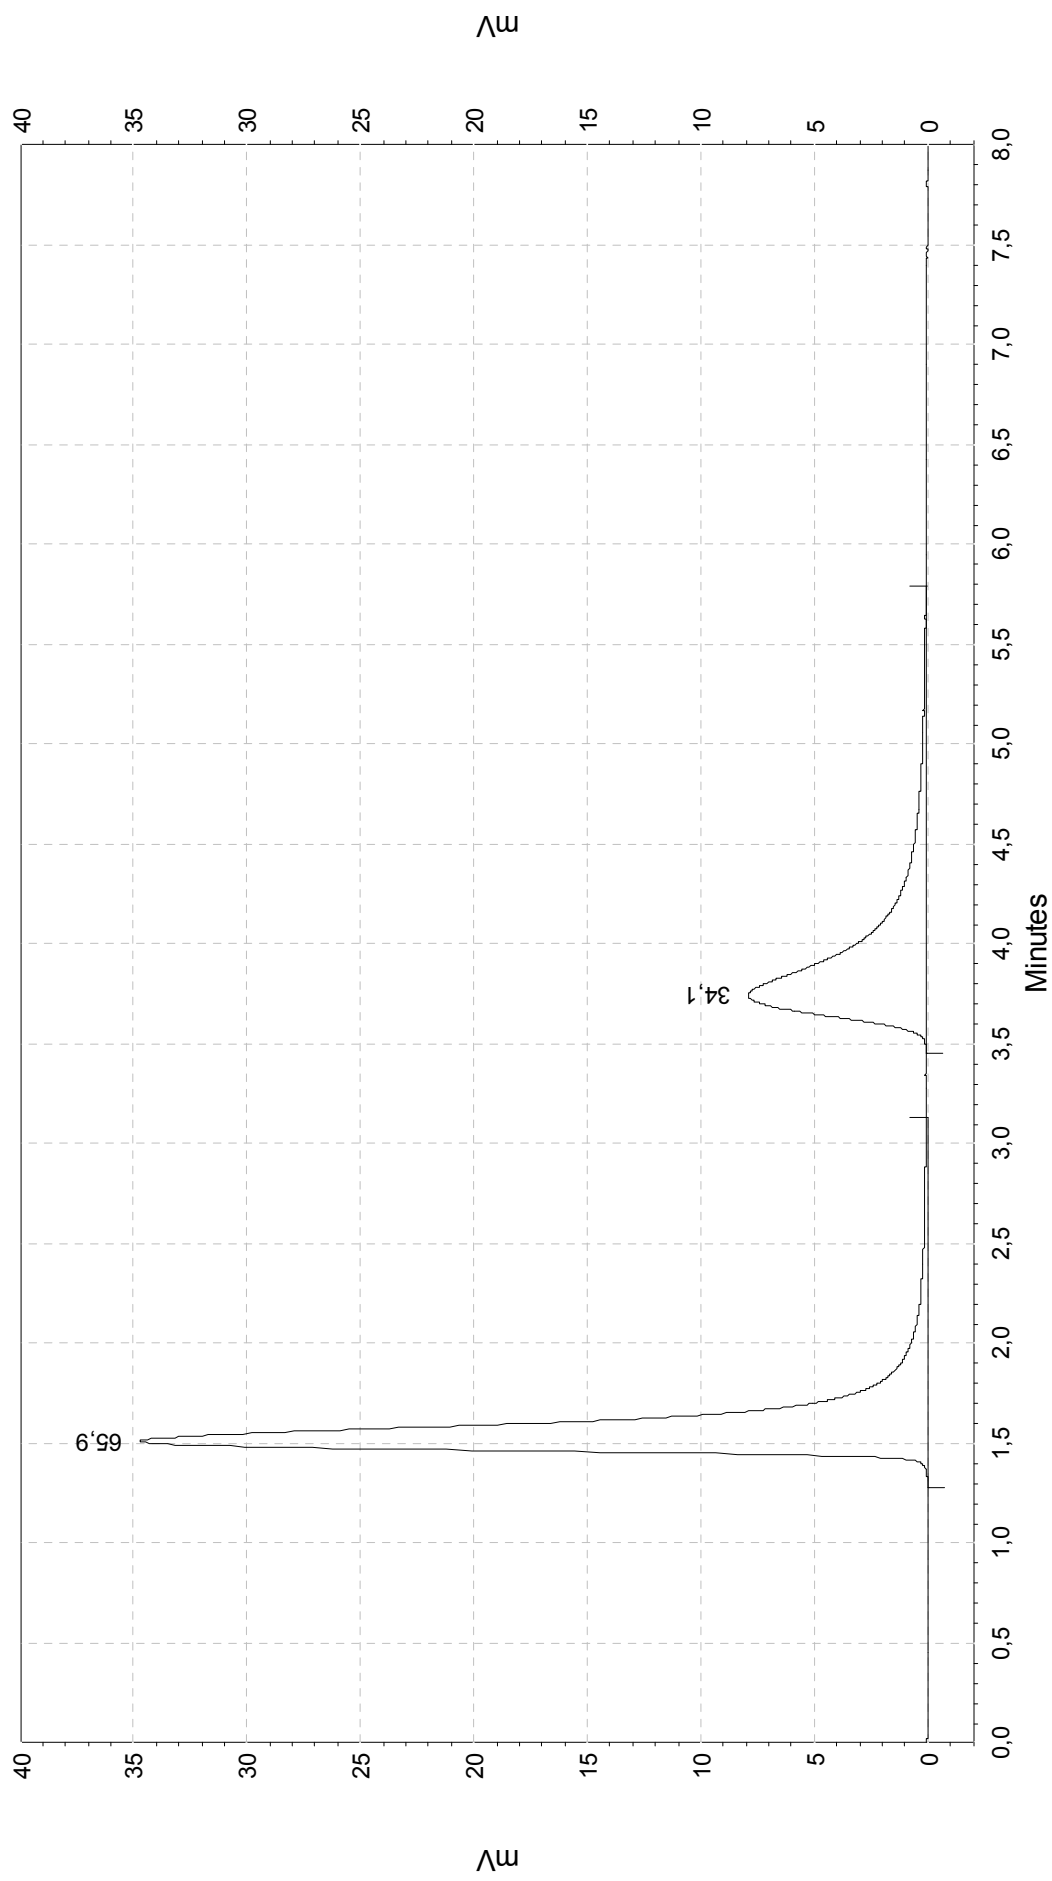

First measurement of three independent data for free TPT in tris buffer at pH=7.4  
t=310 min

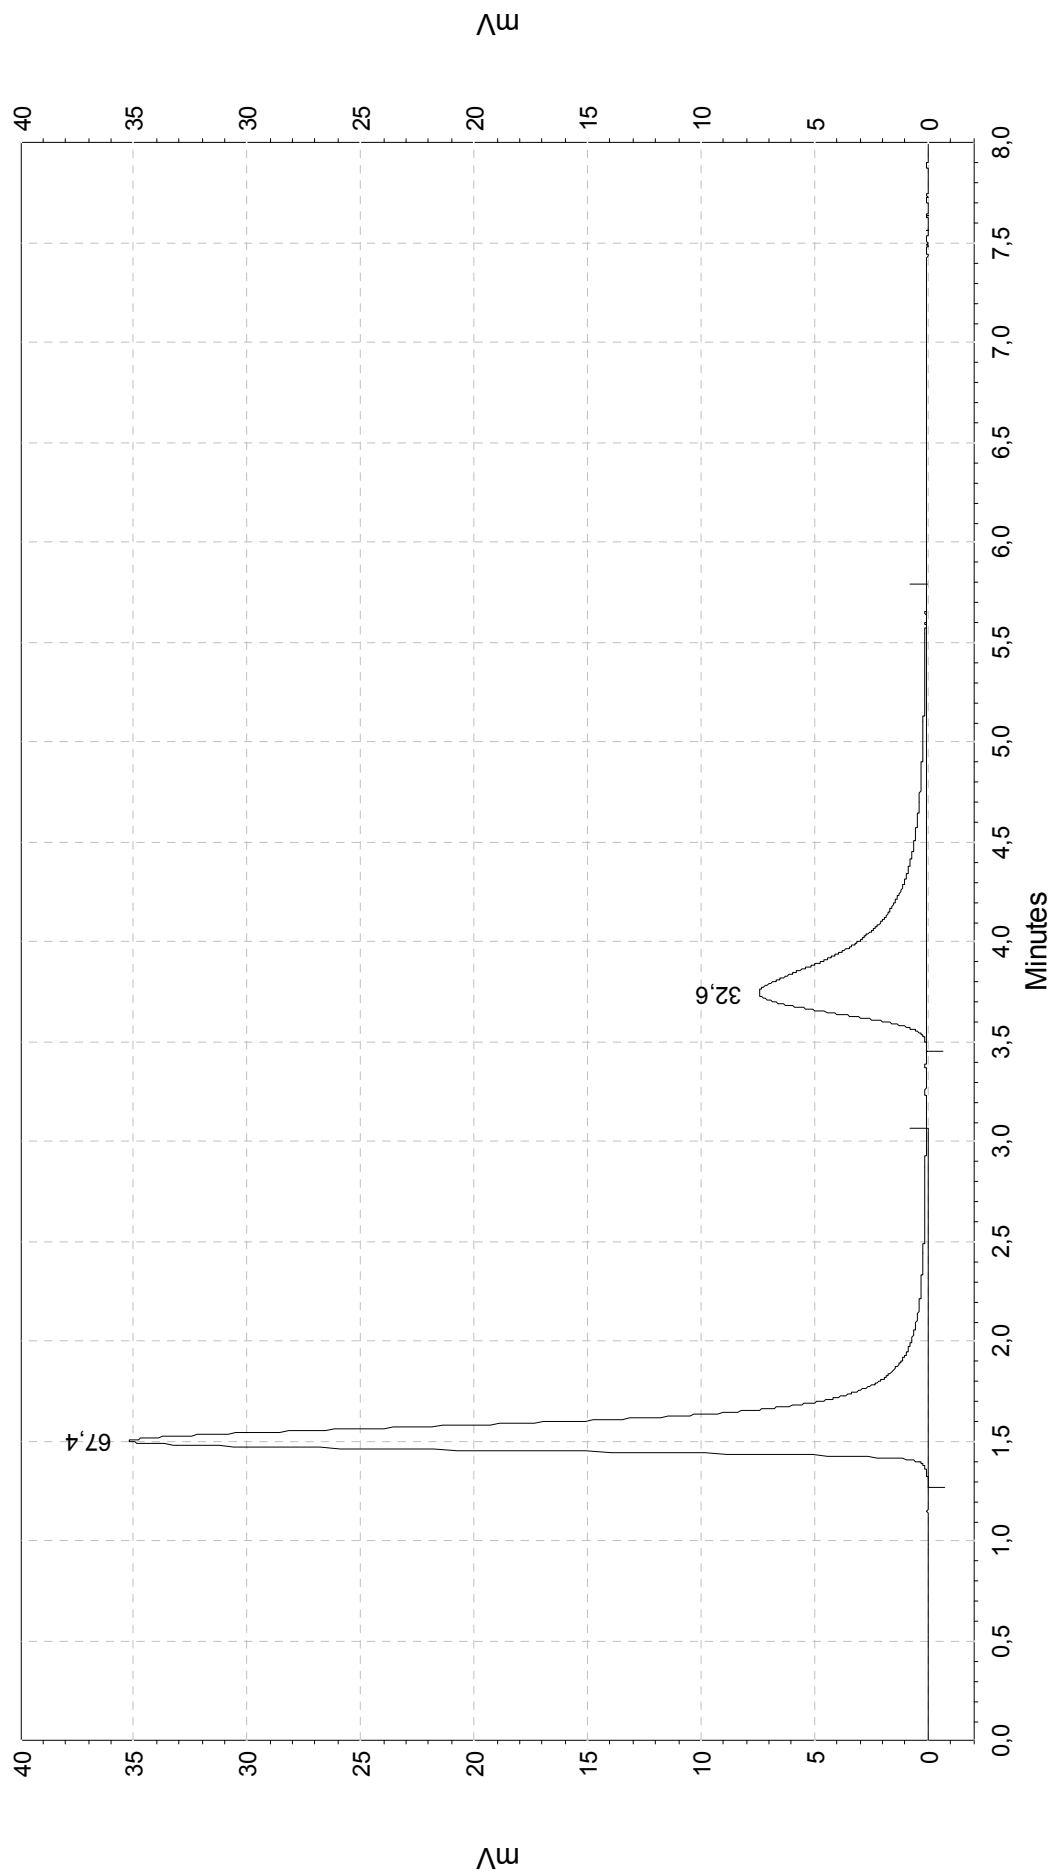



First measurement of three independent data for CPT in gel at 0.015% loading  
 $t = 0$  min

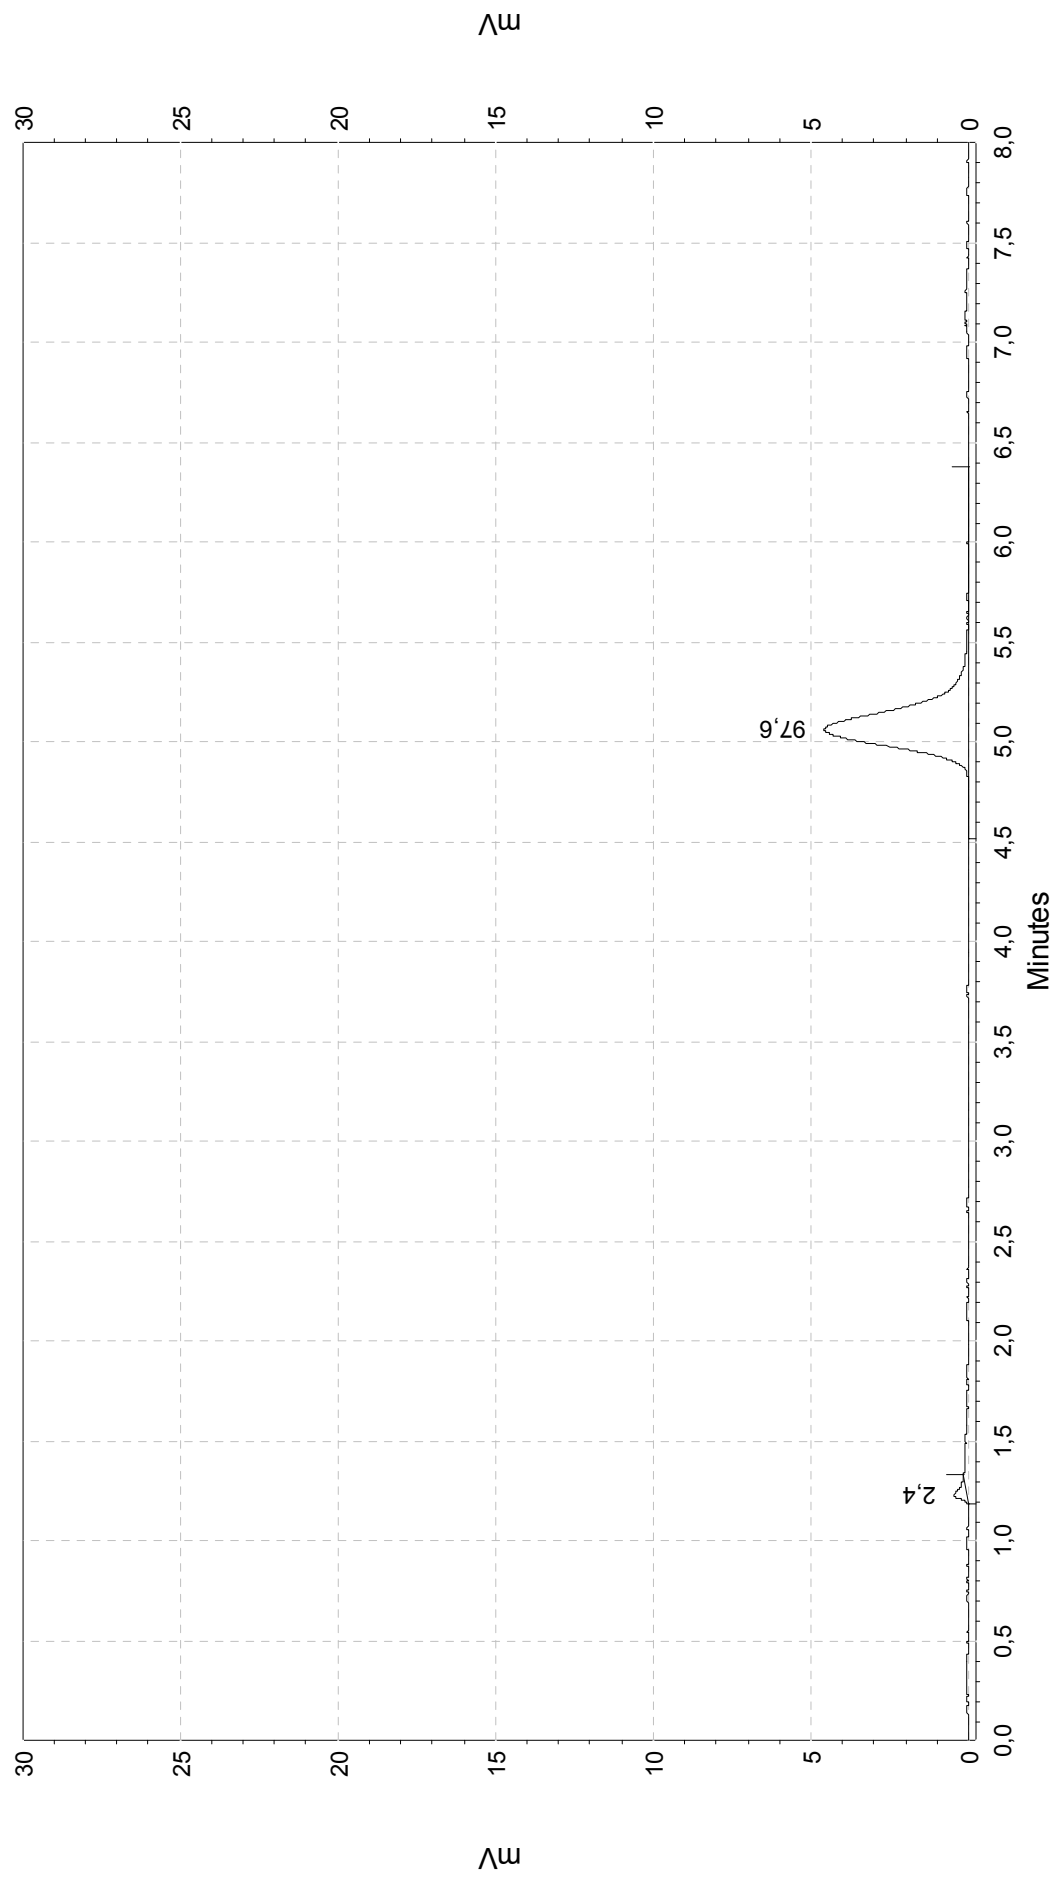

First measurement of three independent data for CPT in gel at 0.015% loading  
 $t = 45$  min

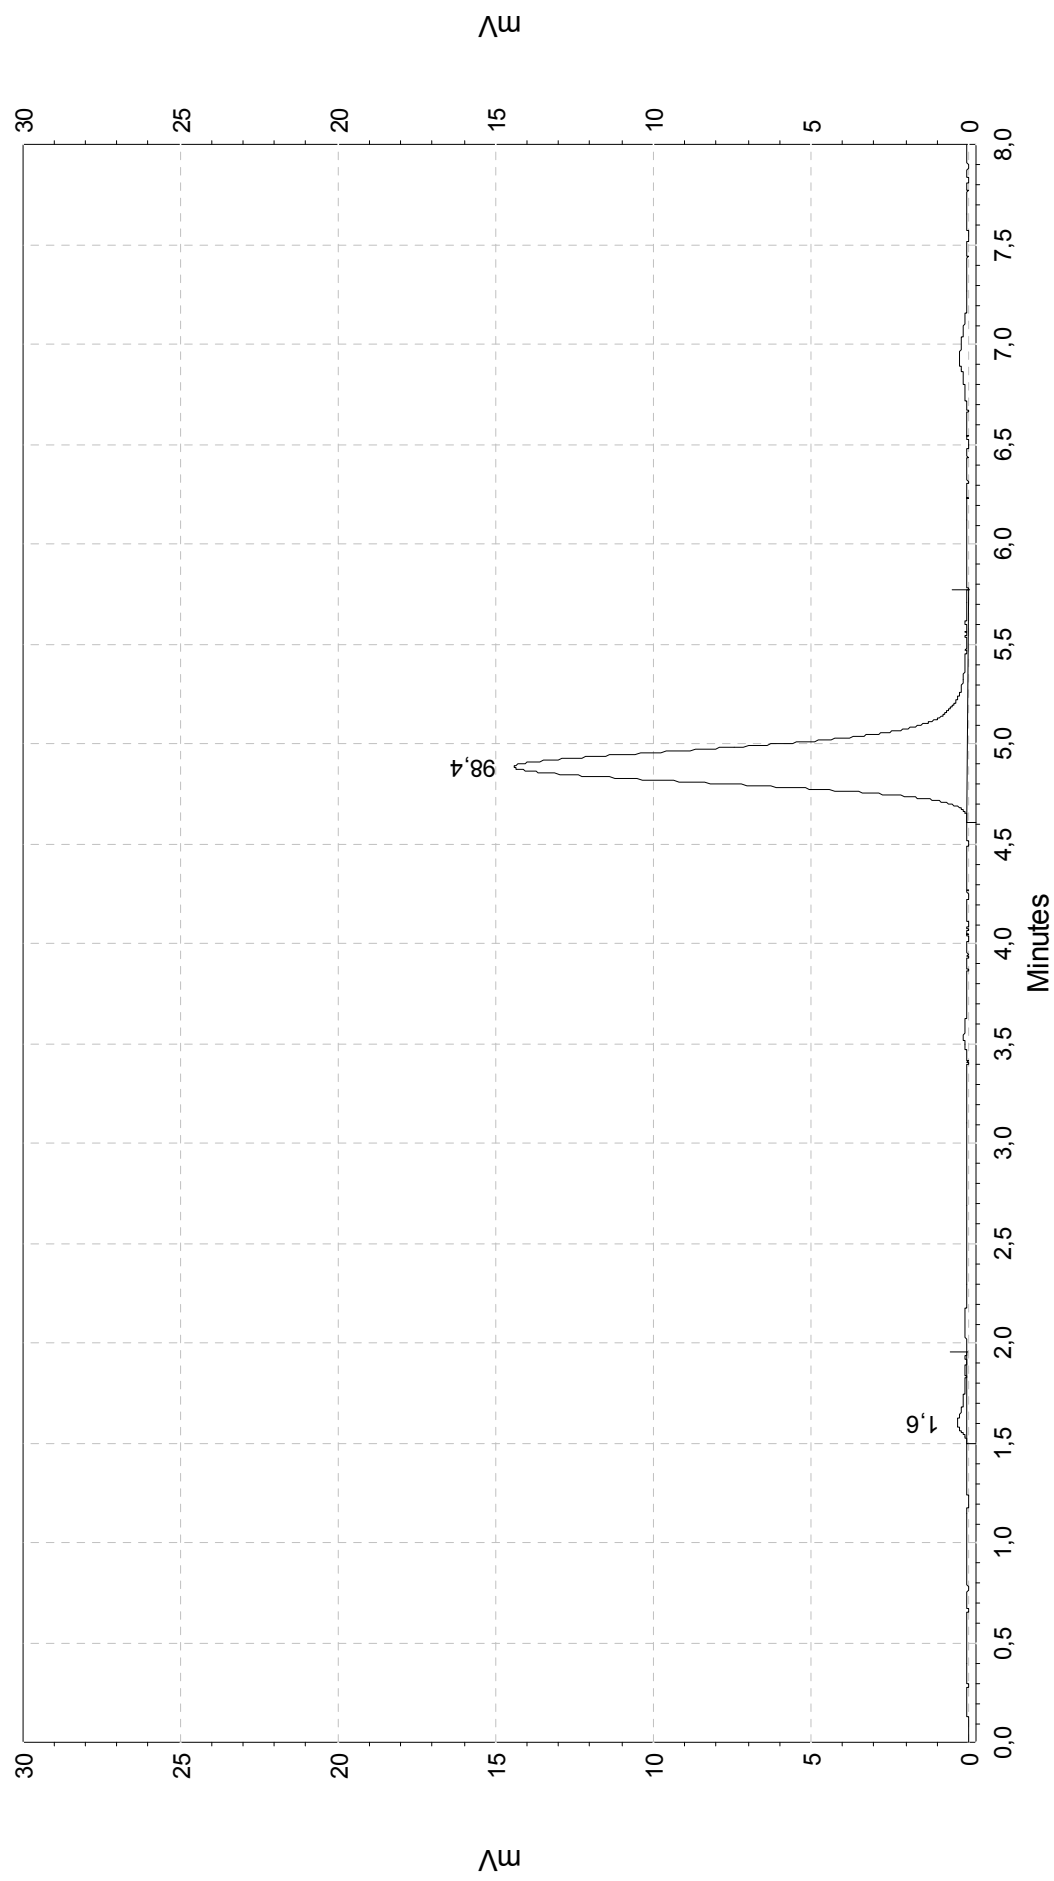

First measurement of three independent data for CPT in gel at 0.015% loading  
t = 90 min

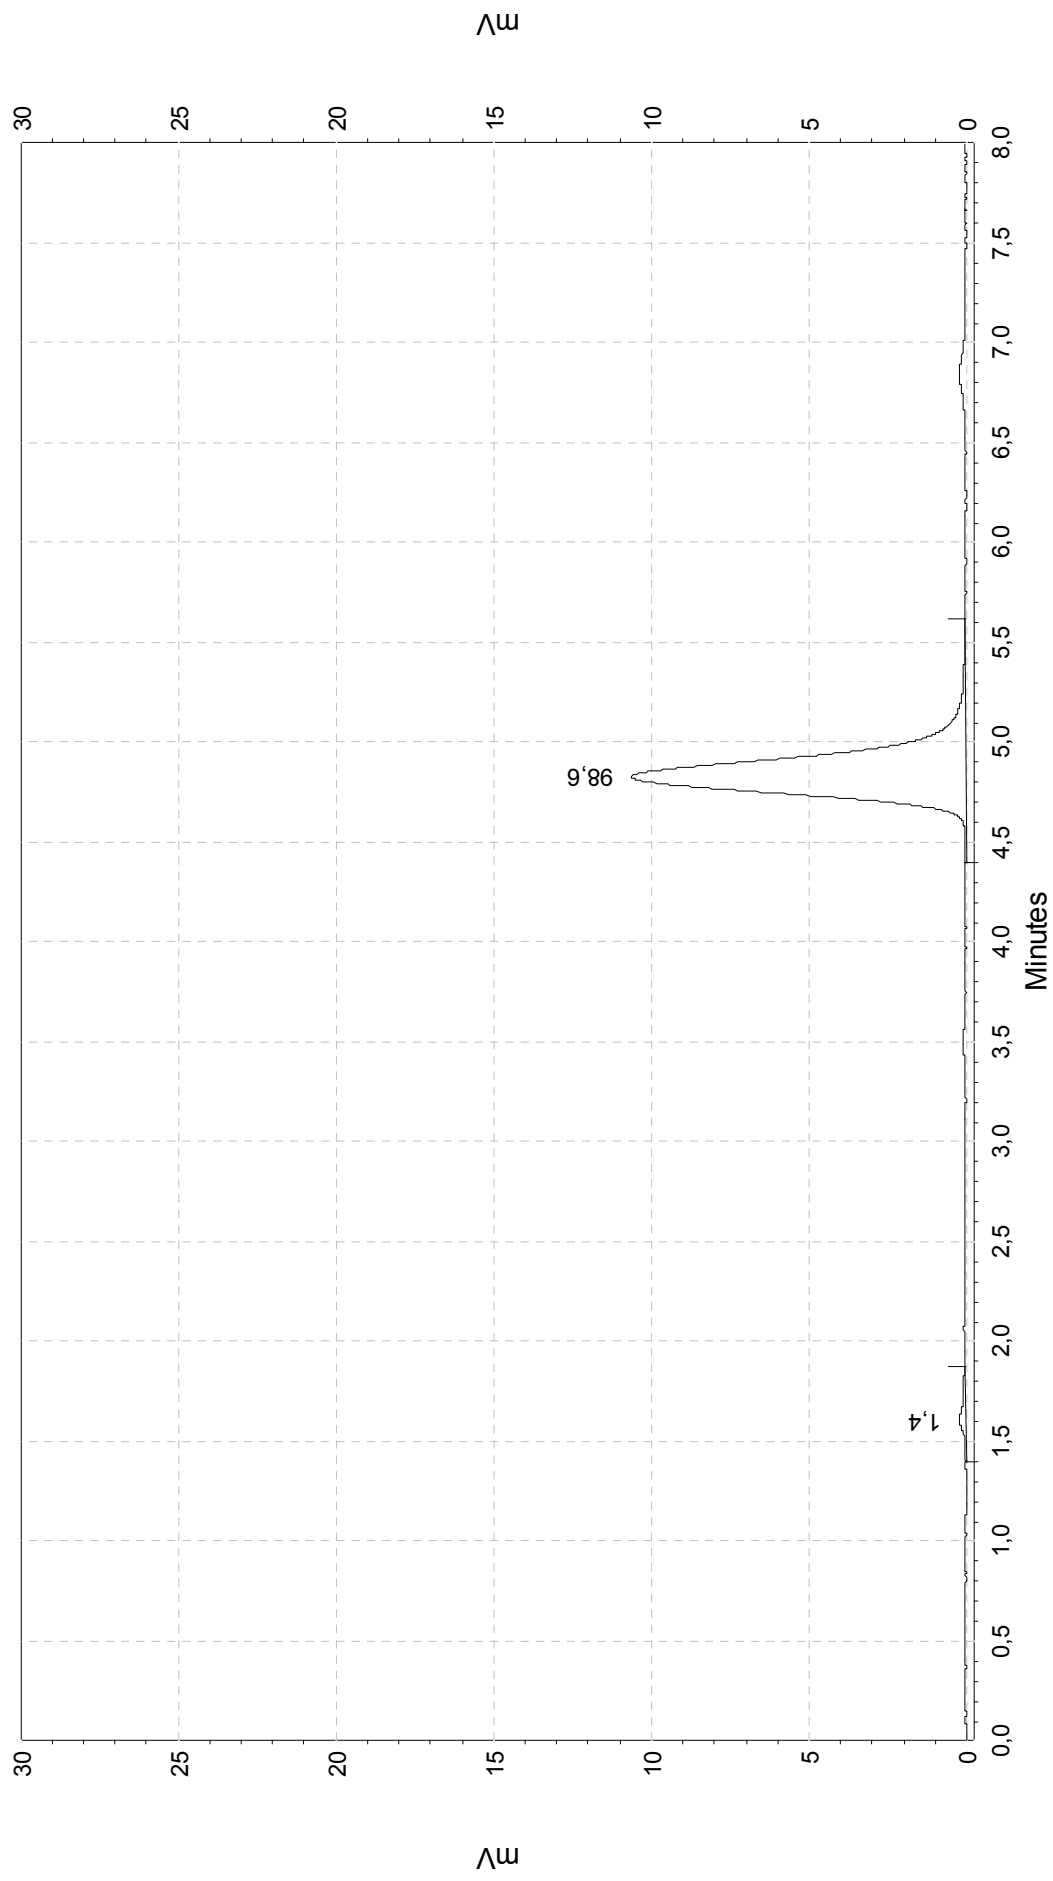

First measurement of three independent data for CPT in gel at 0.015% loading  
 $t = 135$  min

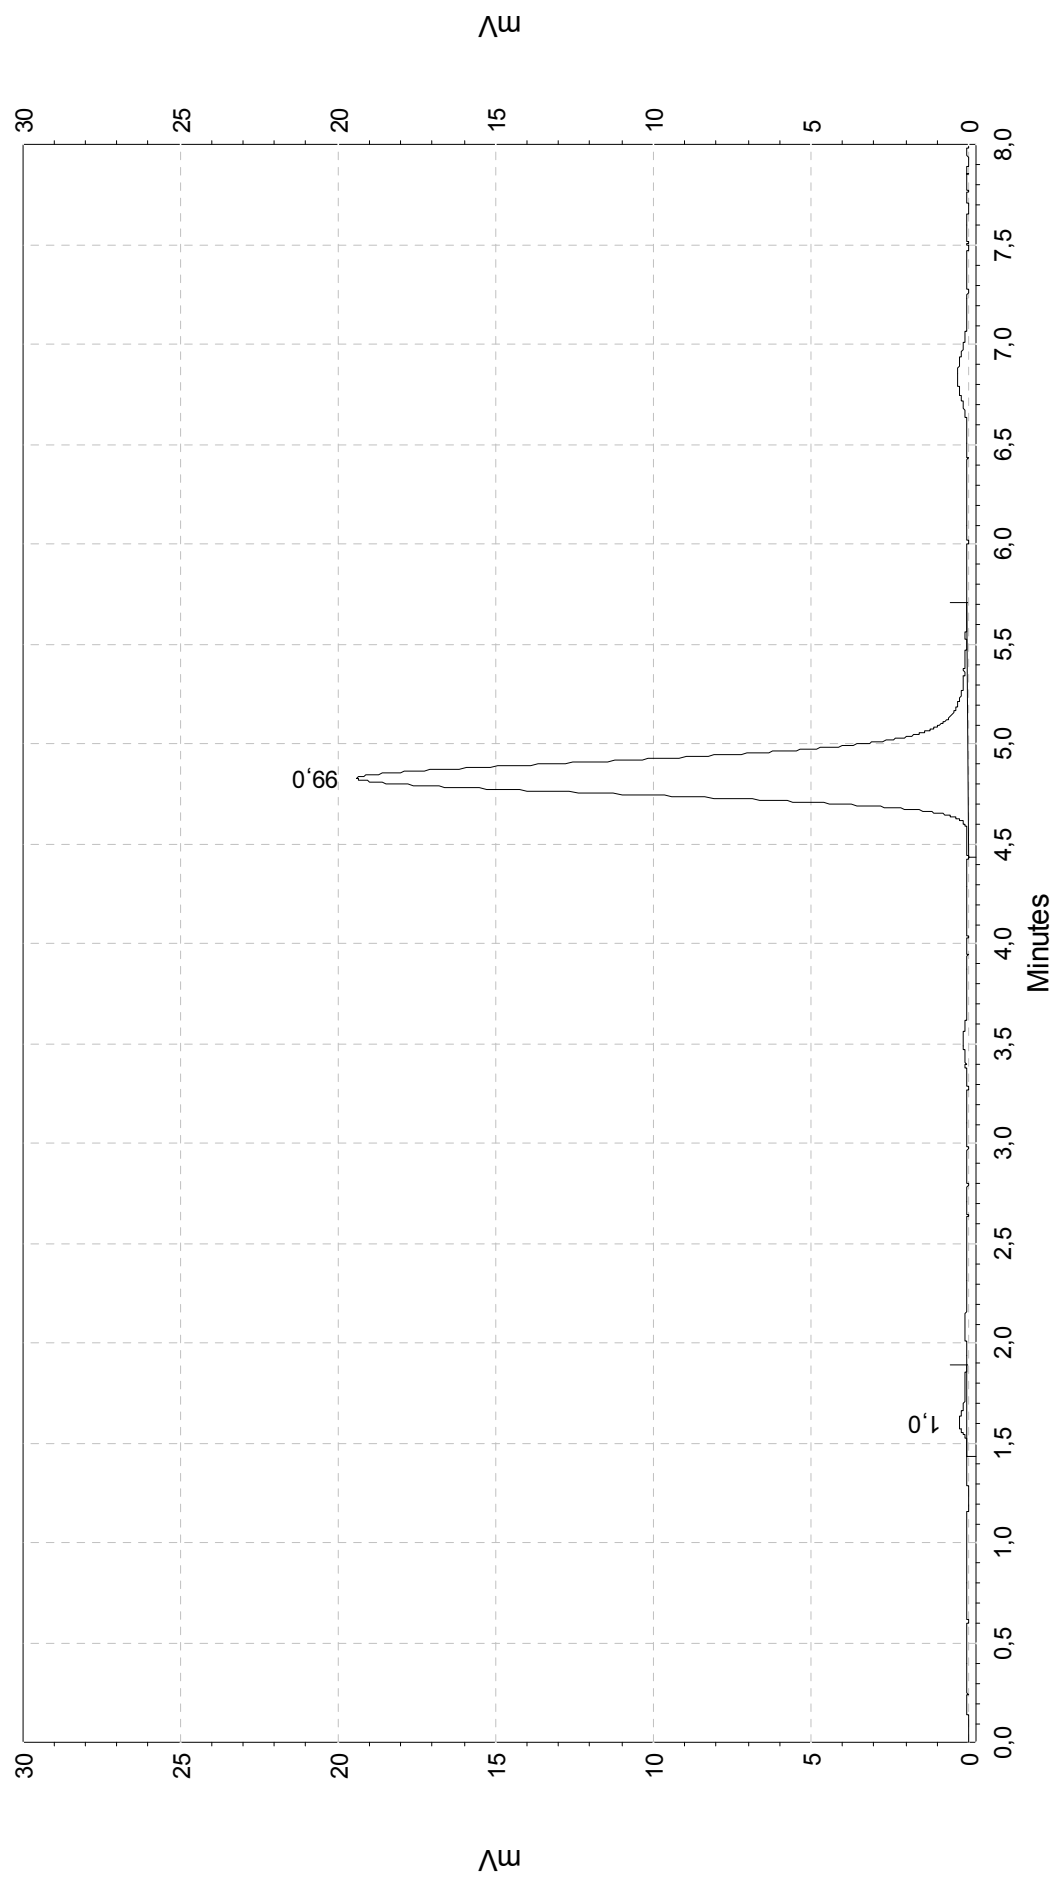

First measurement of three independent data for CPT in gel at 0.015% loading  
 $t = 180$  min

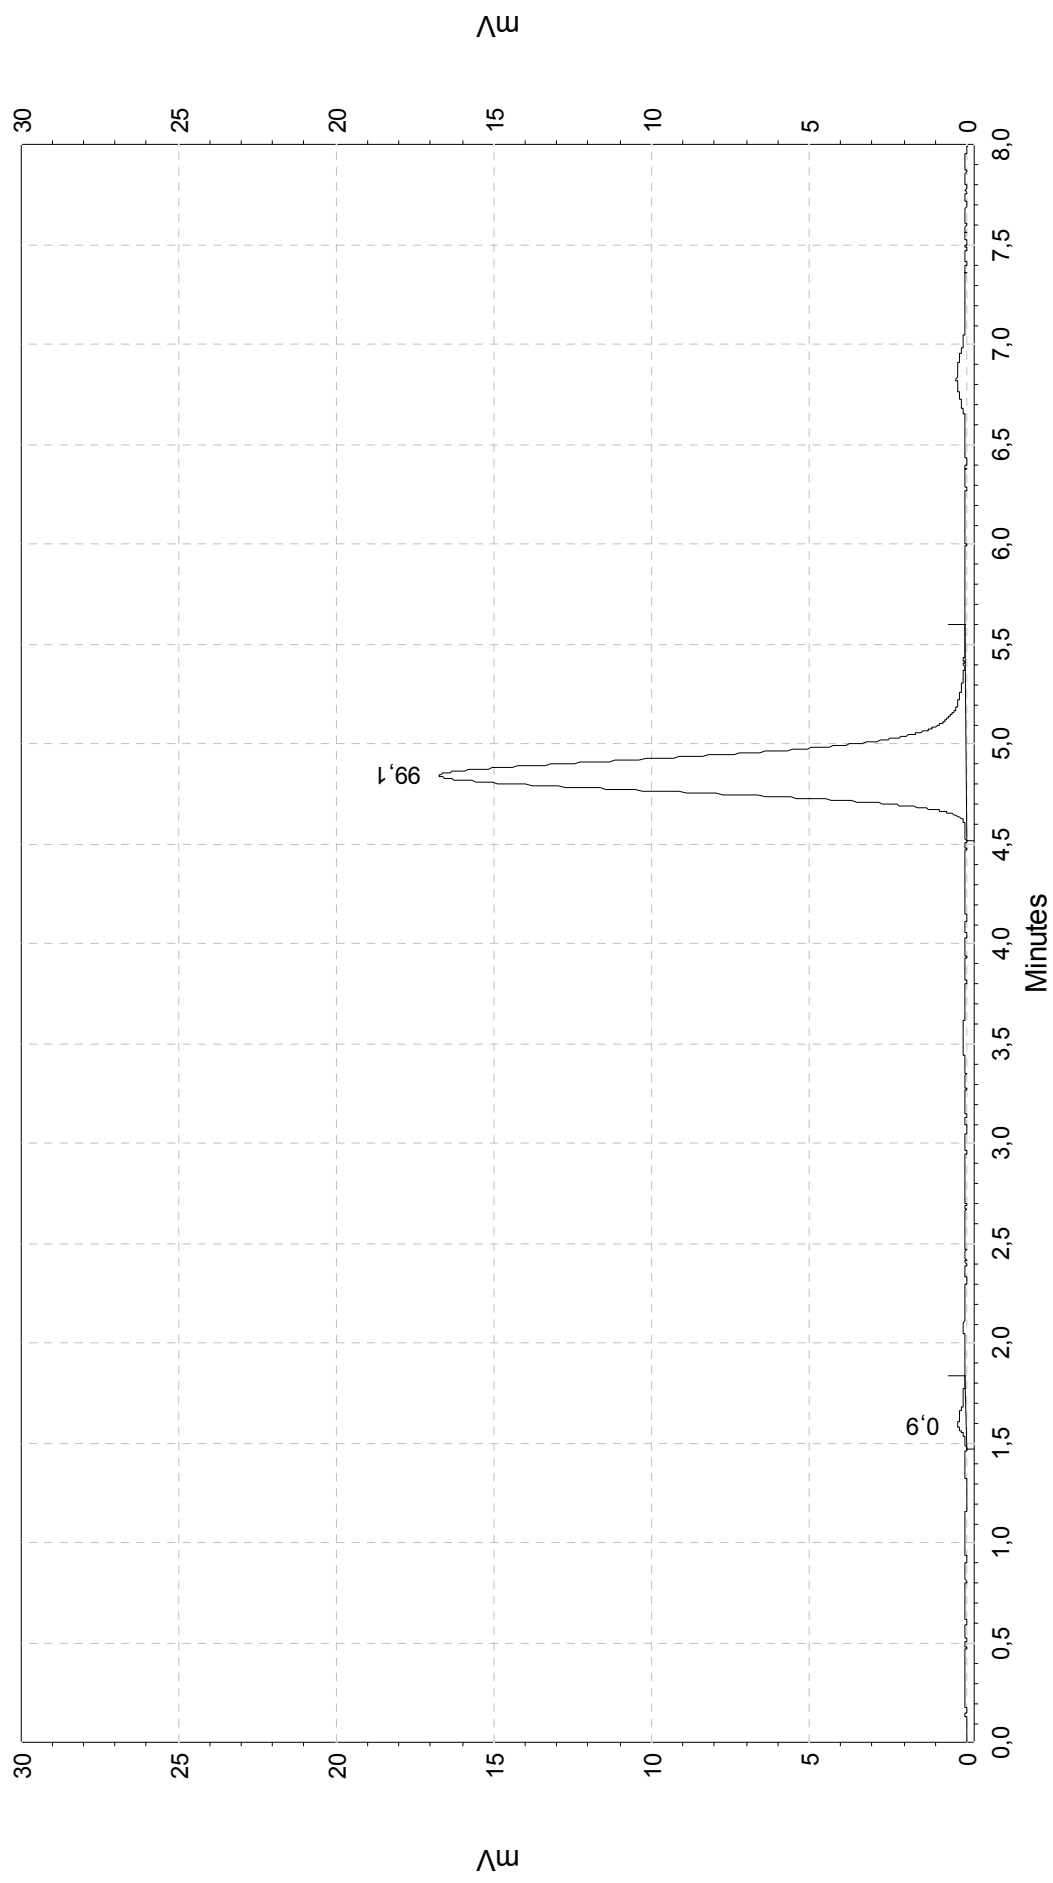

First measurement of three independent data for CPT in gel at 0.015% loading  
 $t = 225$  min

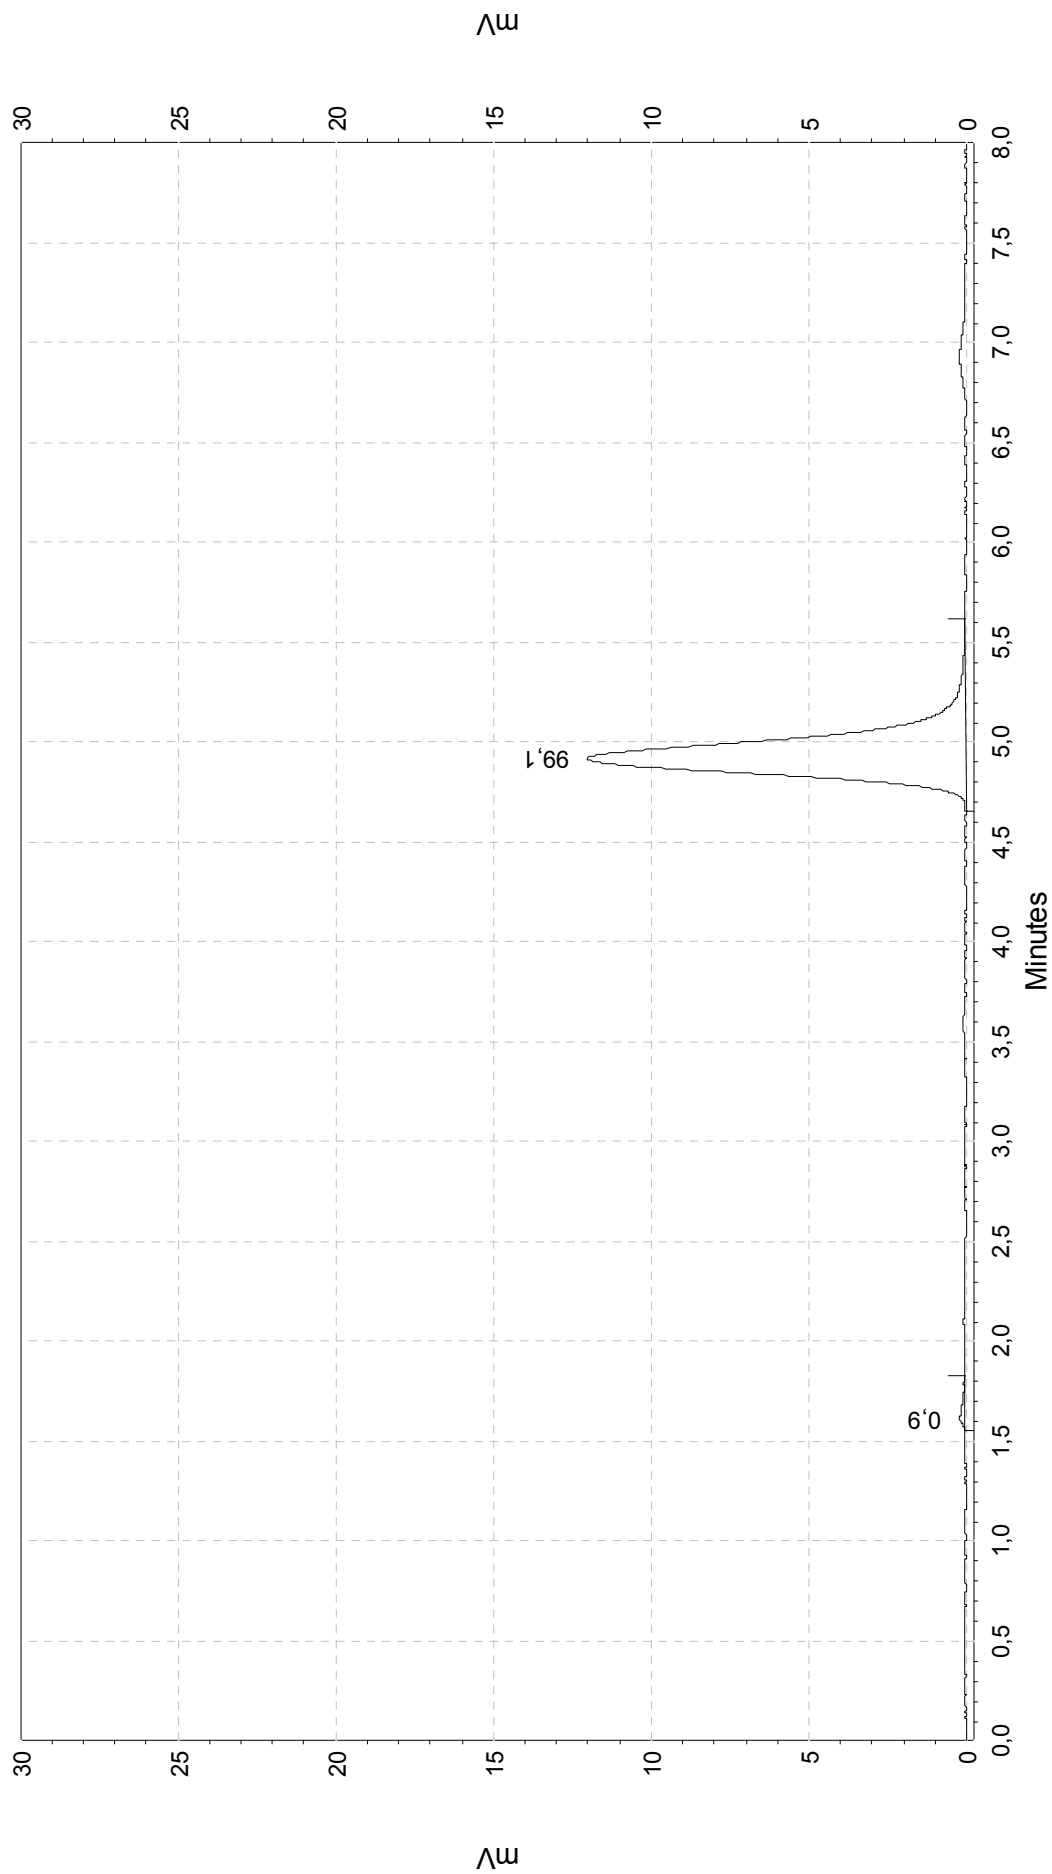

First measurement of three independent data for CPT in gel at 0.015% loading  
t = 270 min

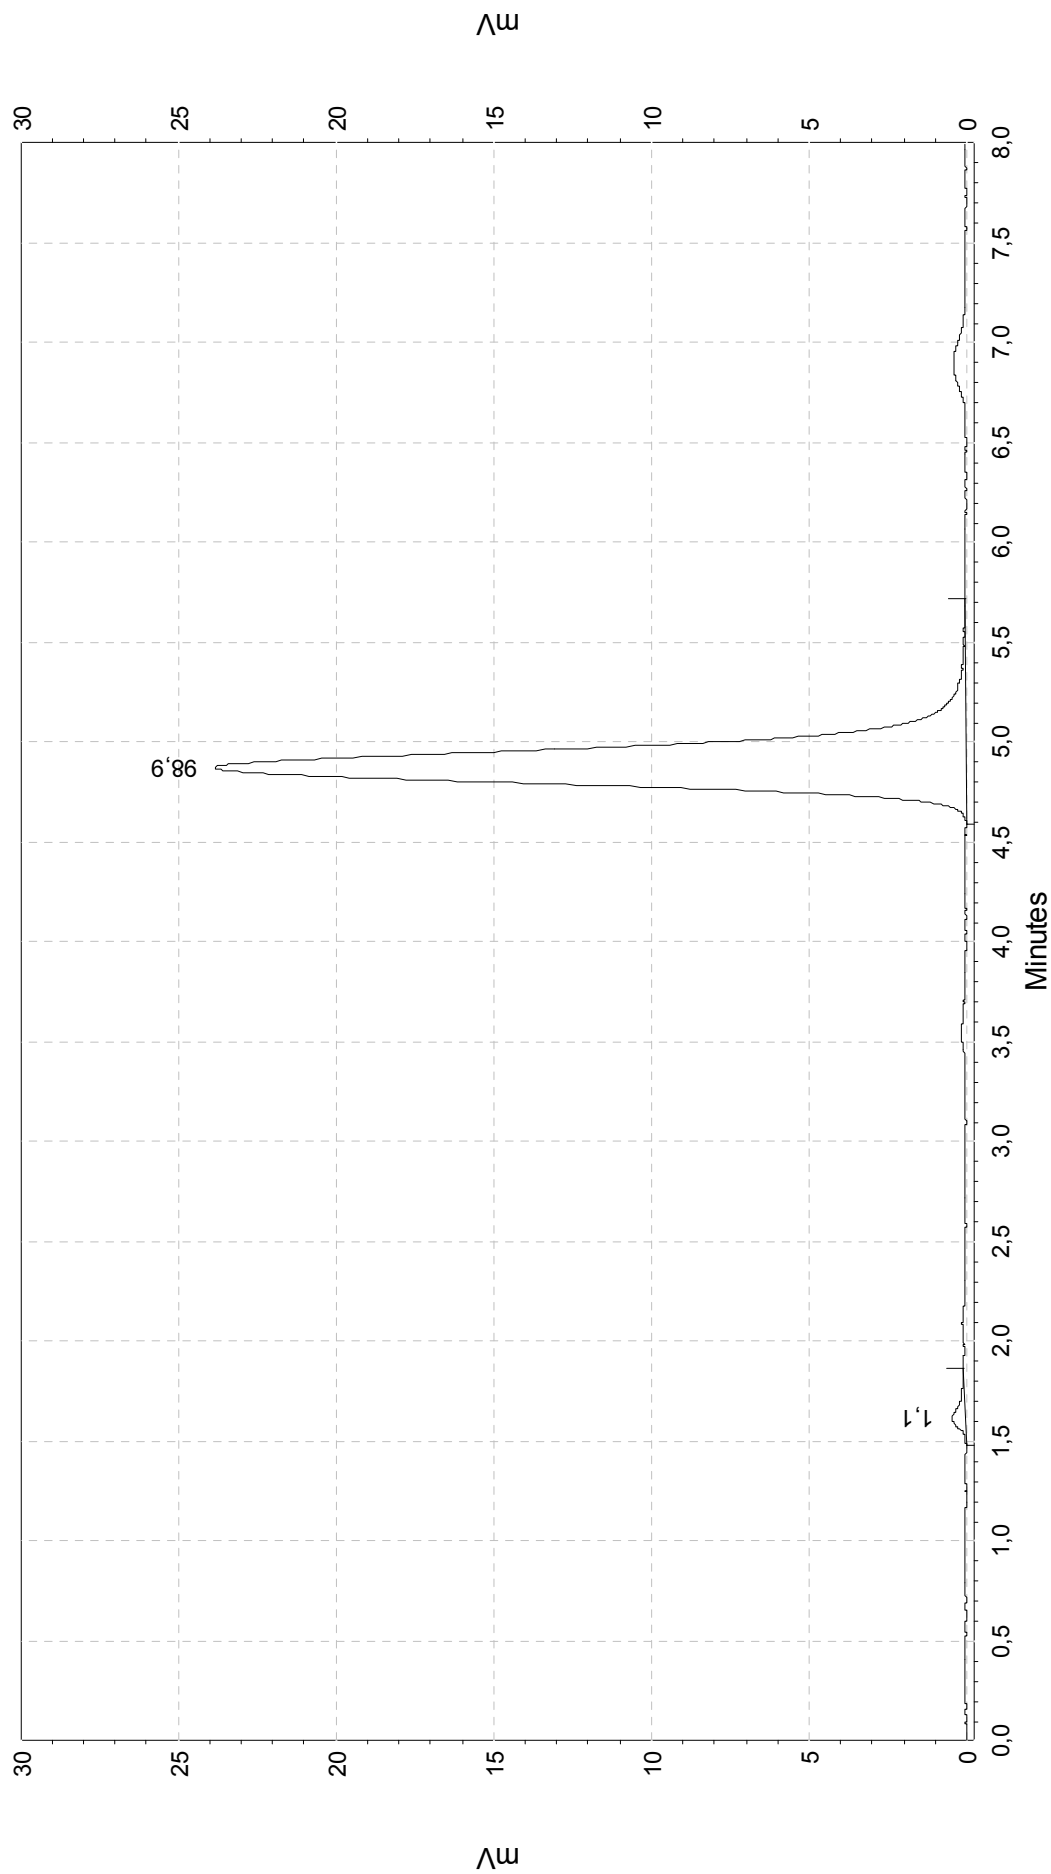

First measurement of three independent data for CPT in gel at 0.015% loading  
 $t = 315$  min

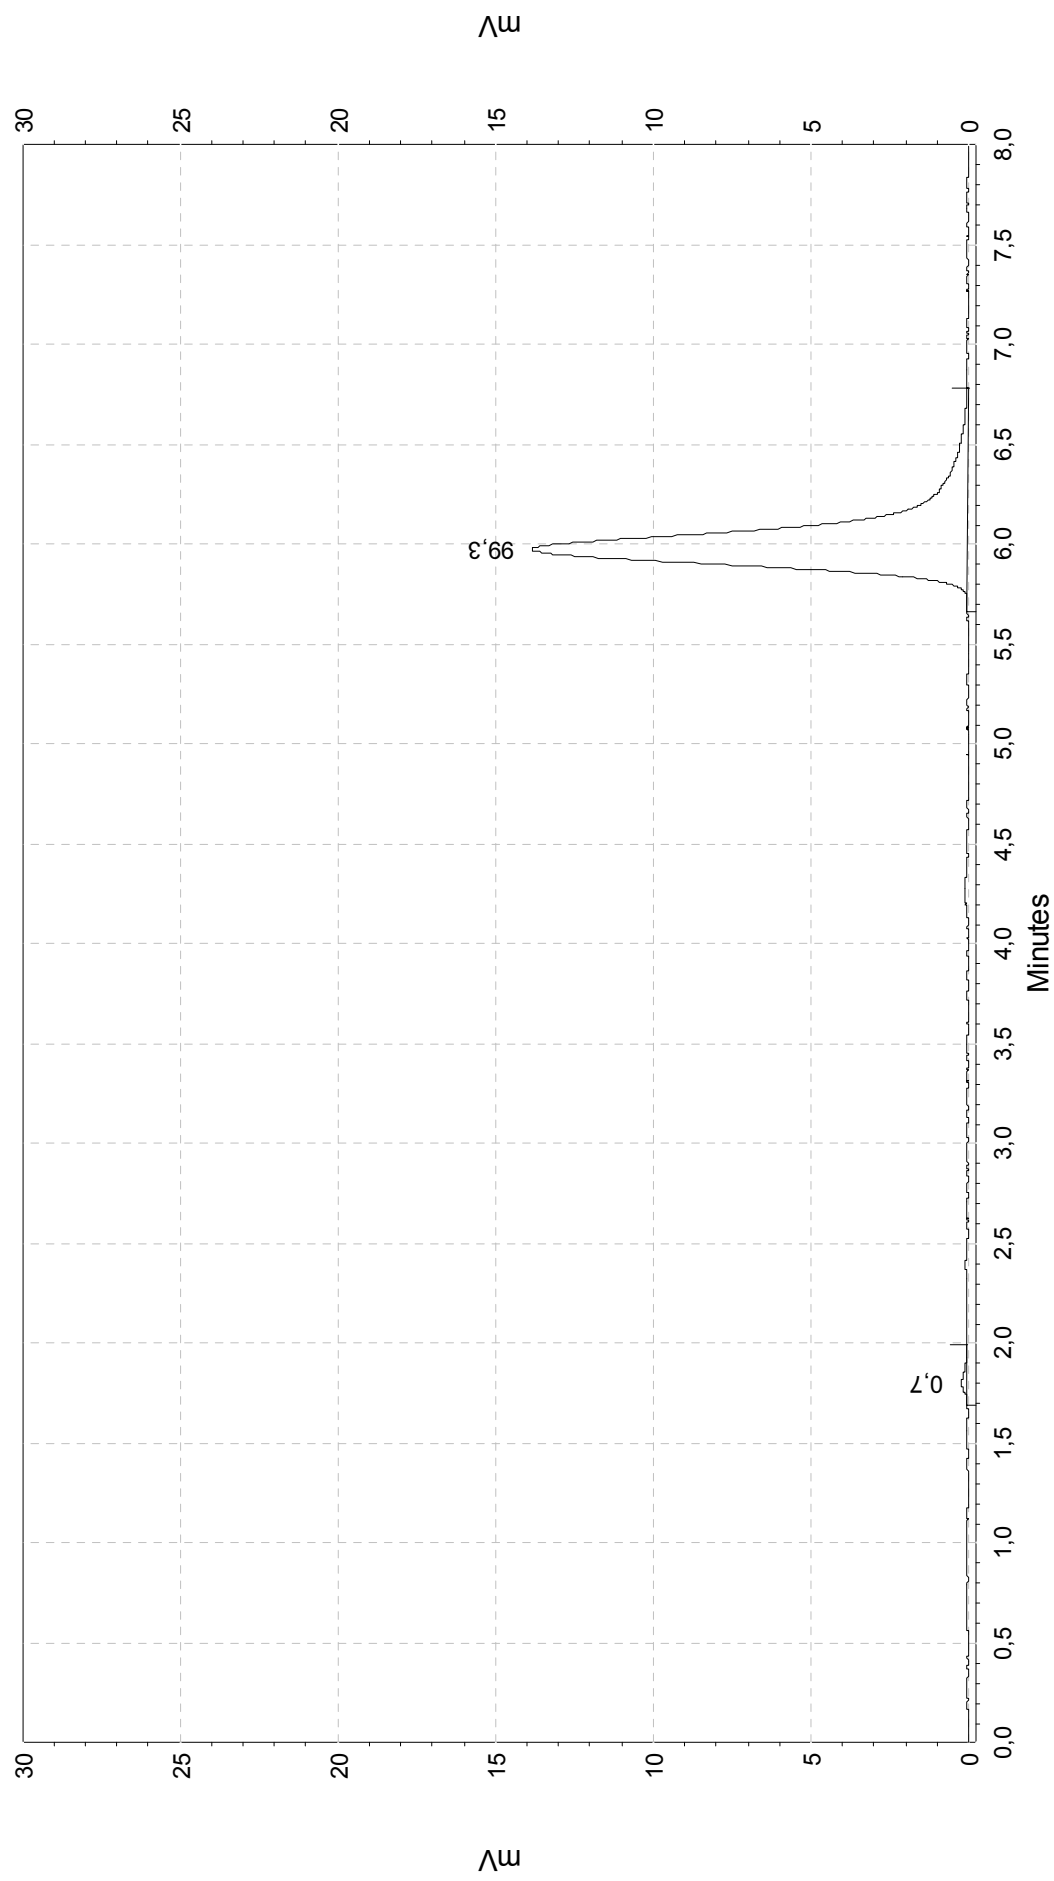



First measurement of three independent data for TPT in gel at 0.015% loading  
t= 0 min

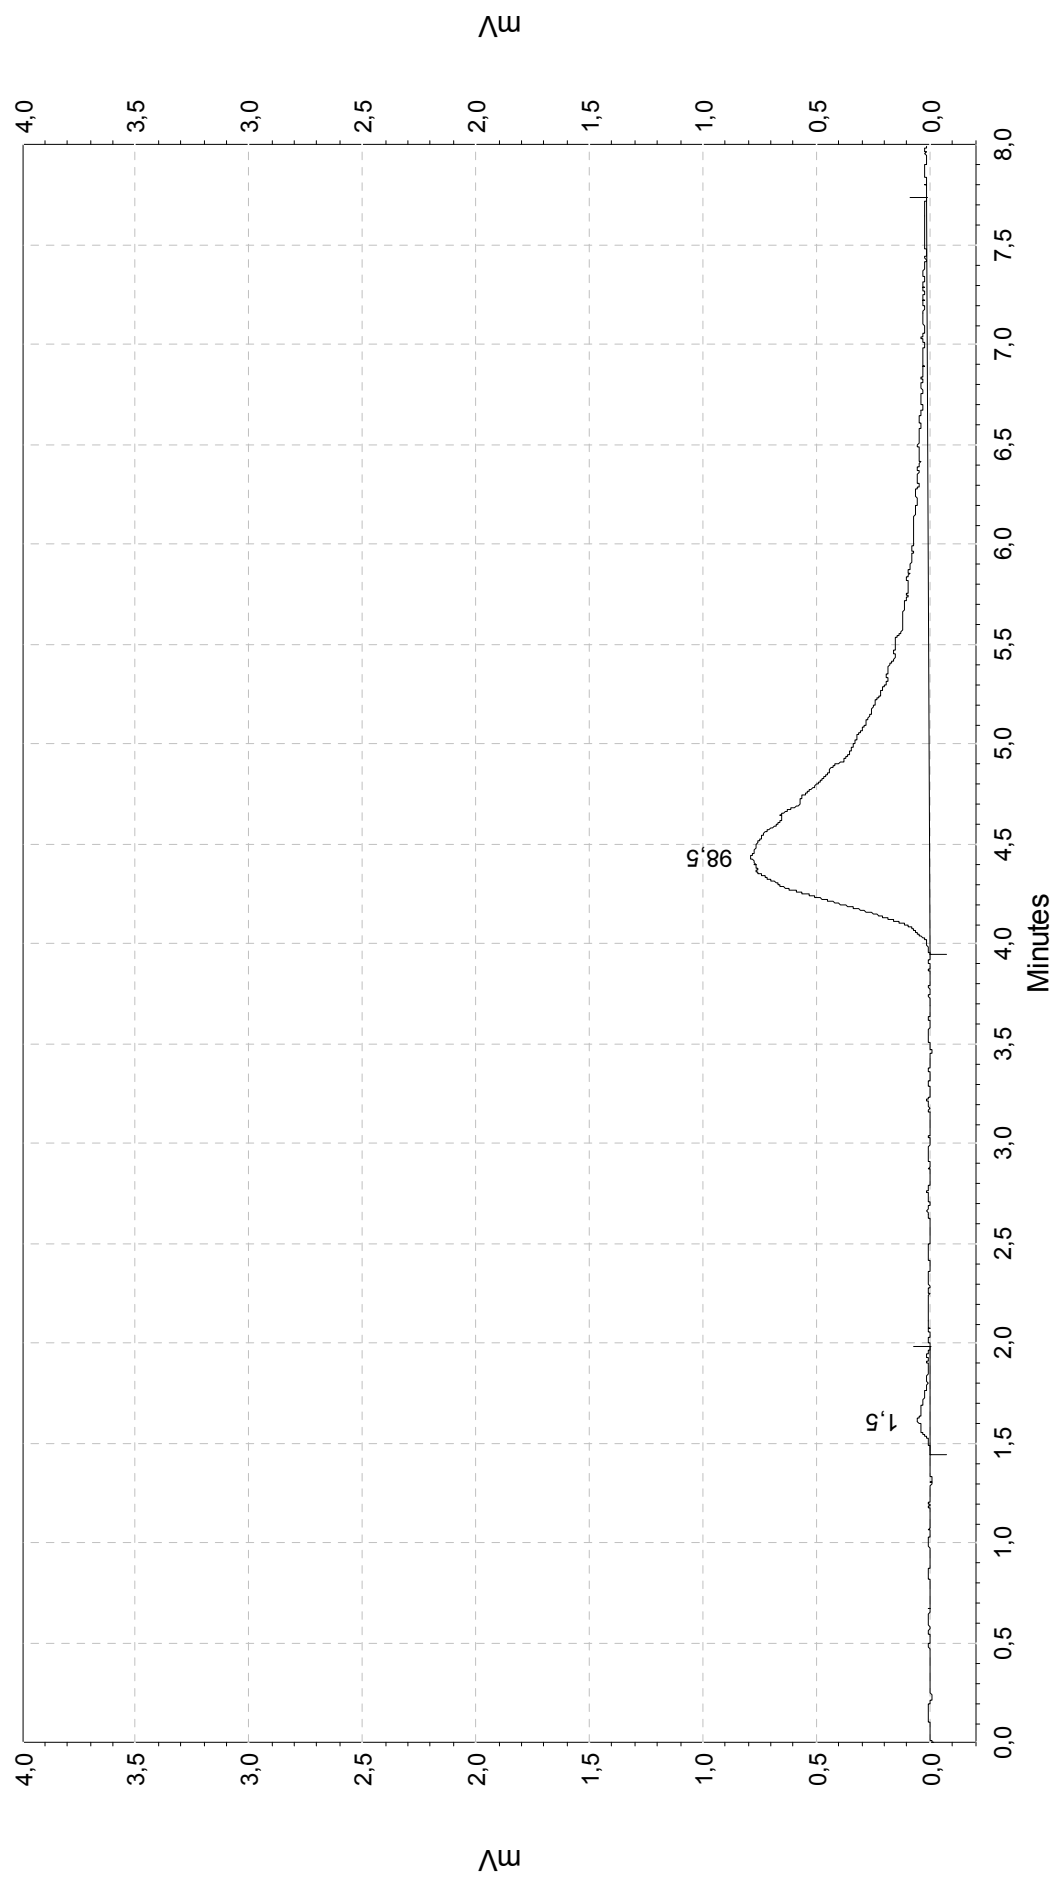

First measurement of three independent data for TPT in gel at 0.015% loading  
 $t = 45$  min

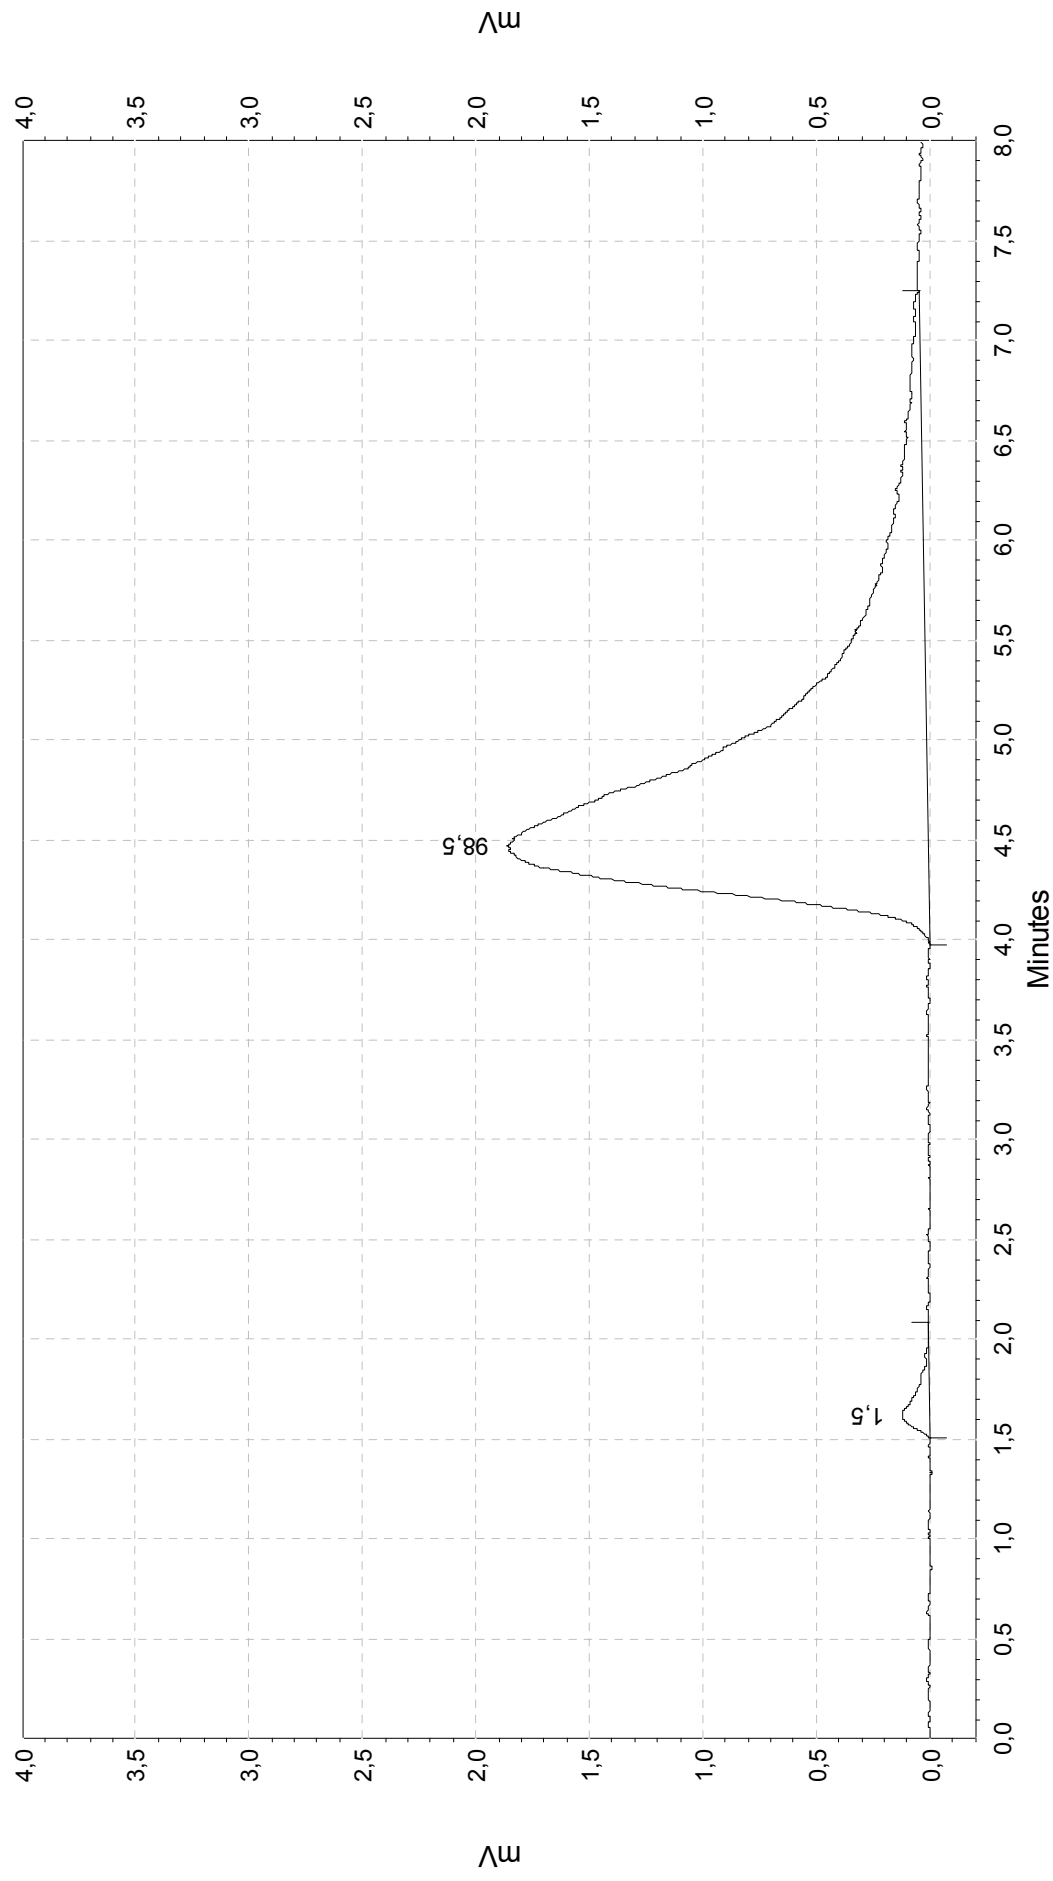

First measurement of three independent data for TPT in gel at 0.015% loading  
t = 90 min

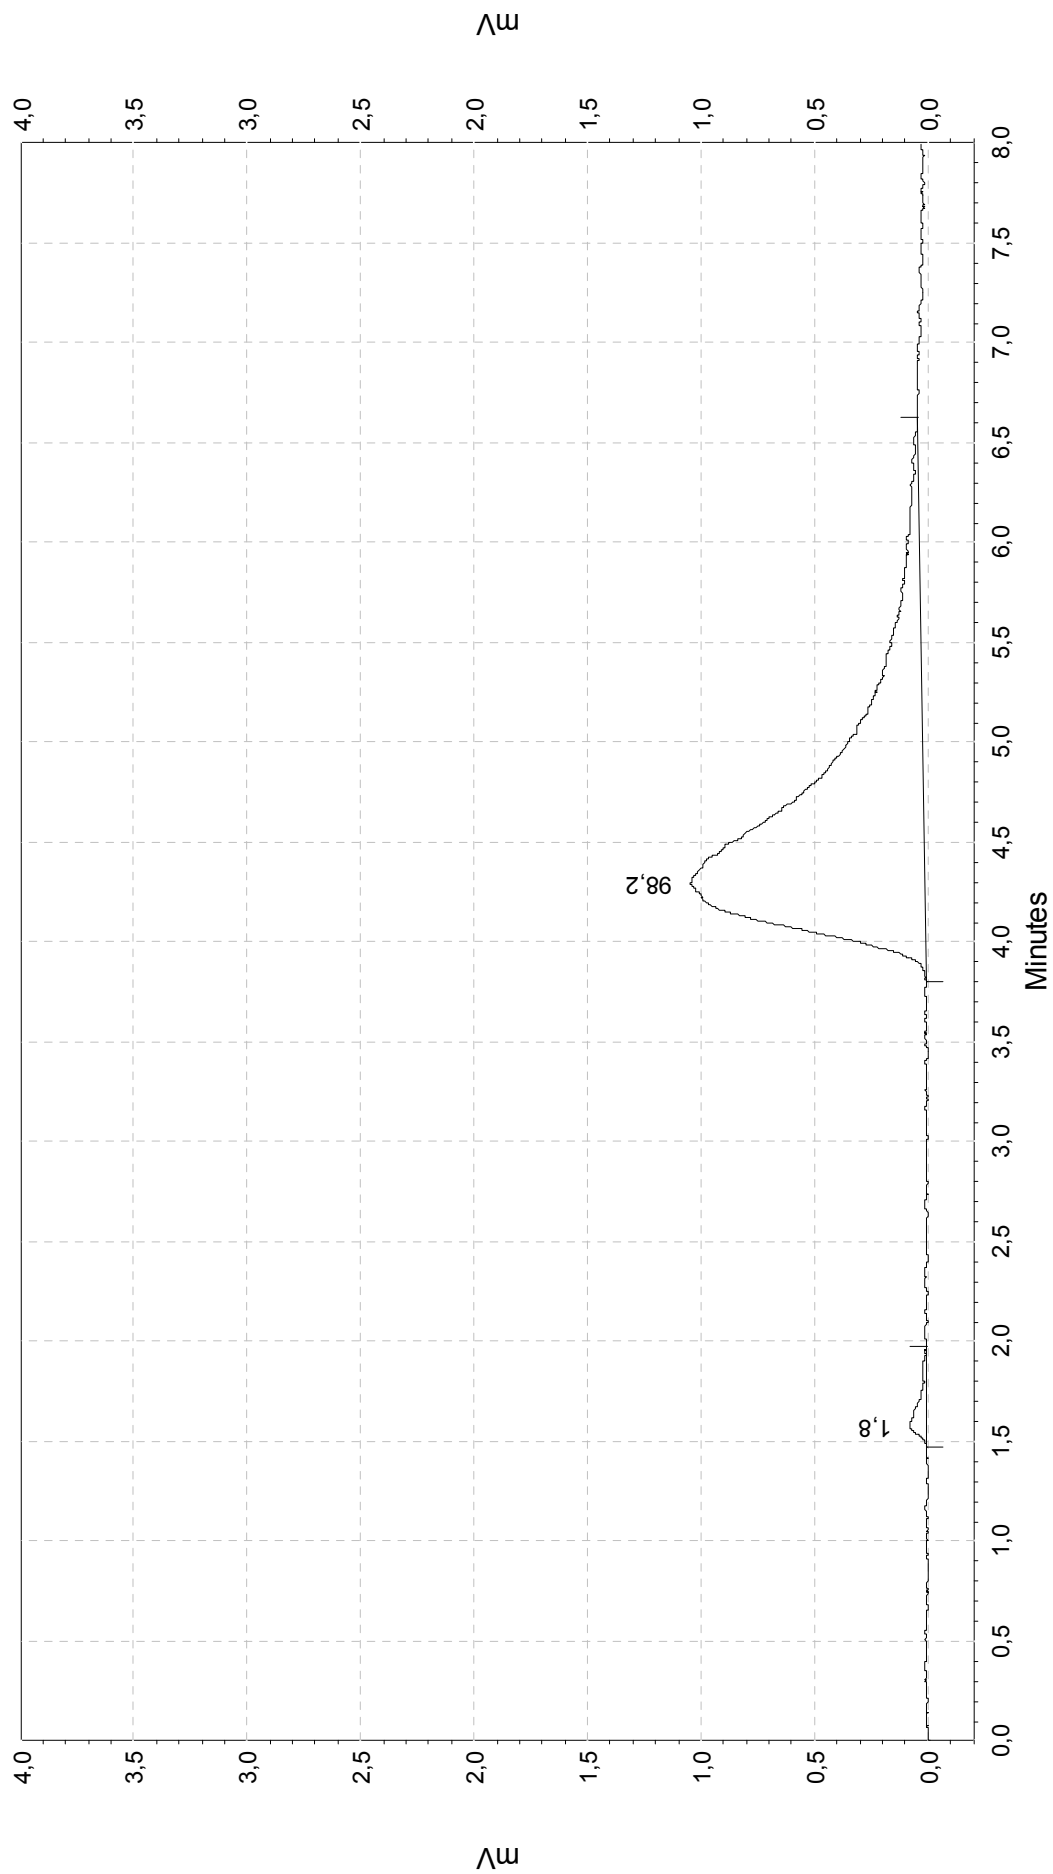

First measurement of three independent data for TPT in gel at 0.015% loading  
 $t = 135$  min

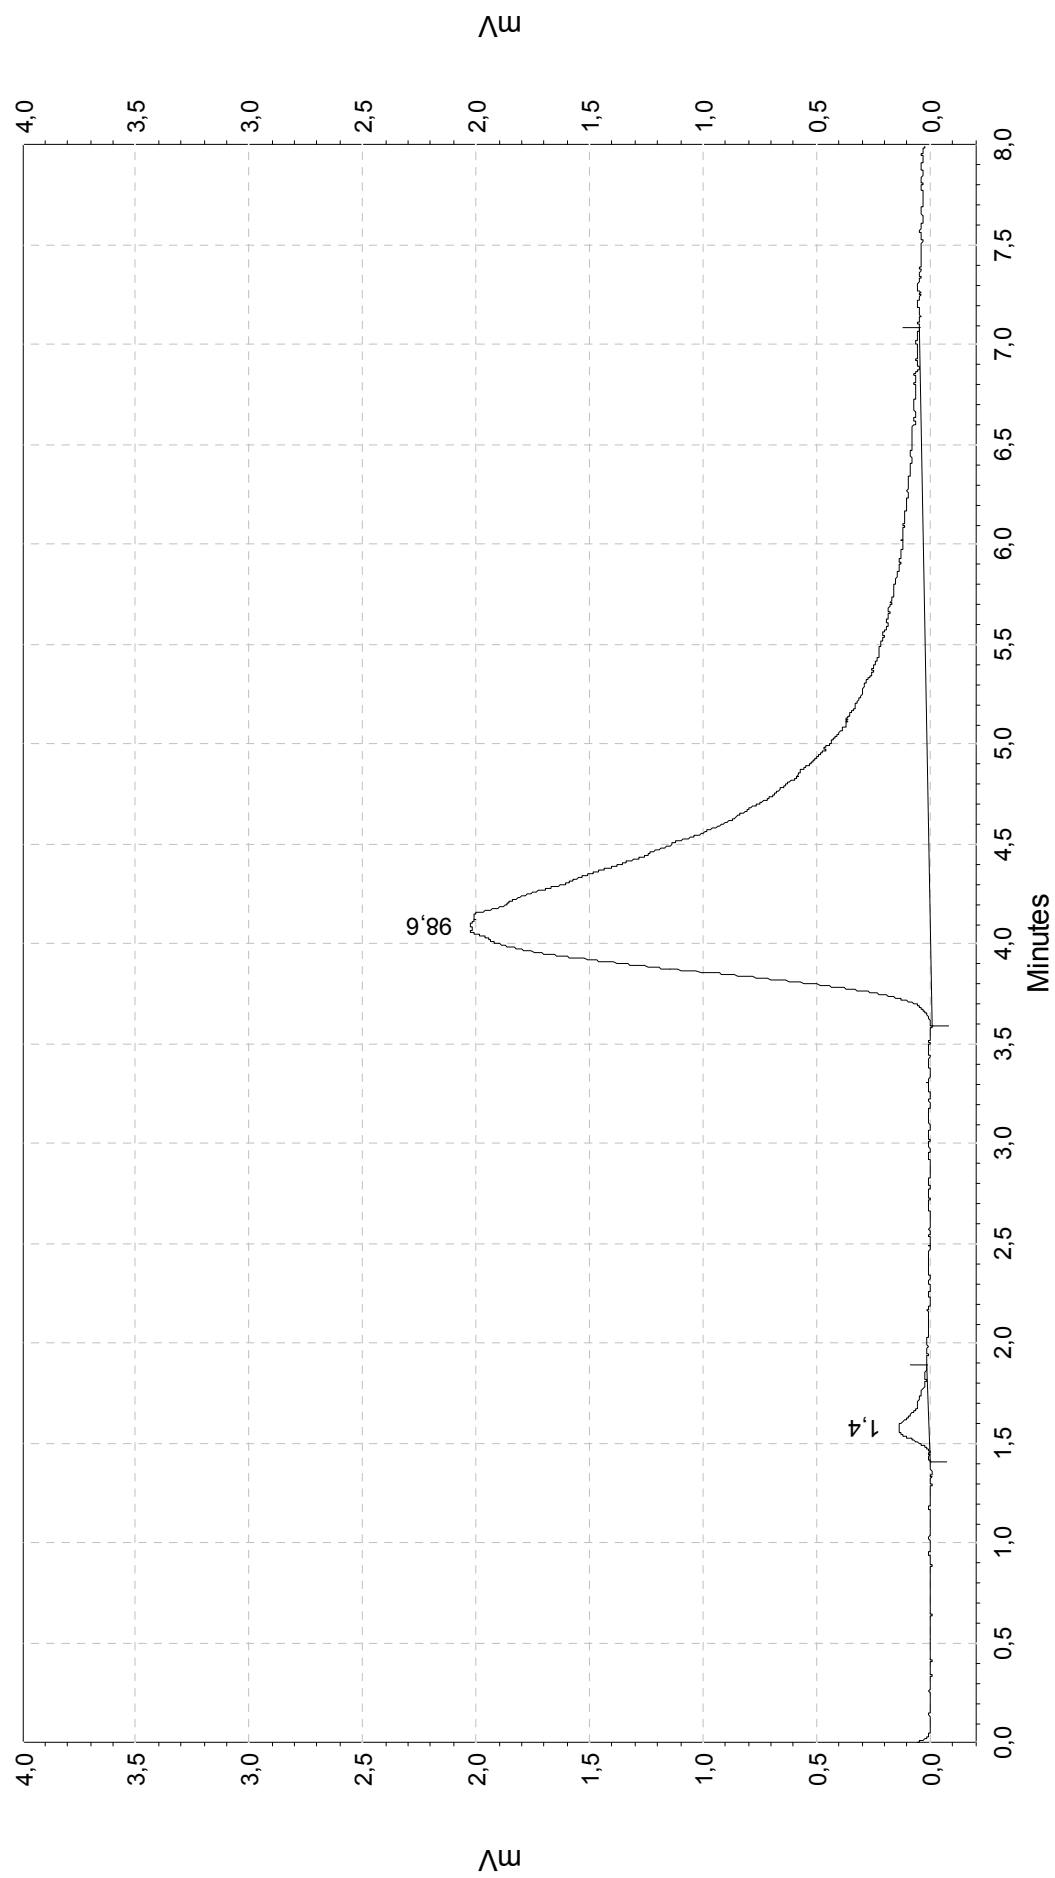

First measurement of three independent data for TPT in gel at 0.015% loading  
 $t = 180$  min

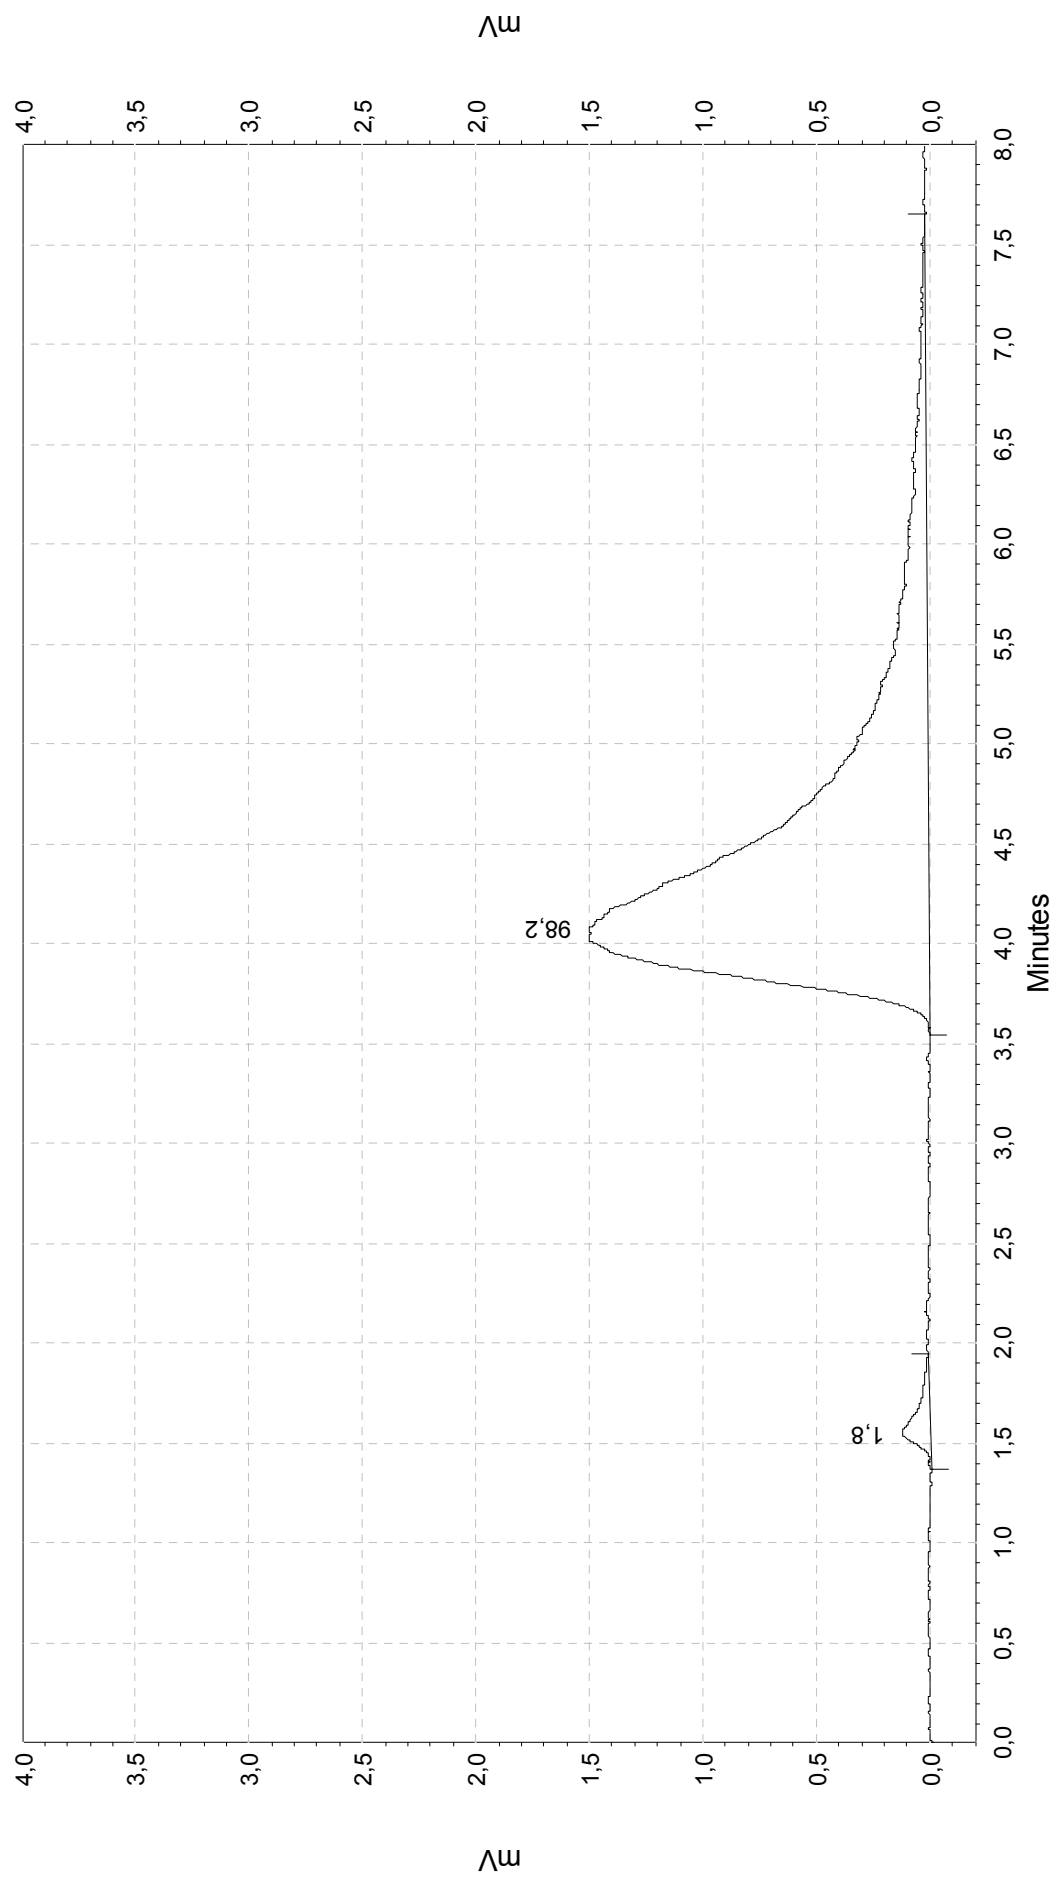

First measurement of three independent data for TPT in gel at 0.015% loading  
 $t = 225$  min

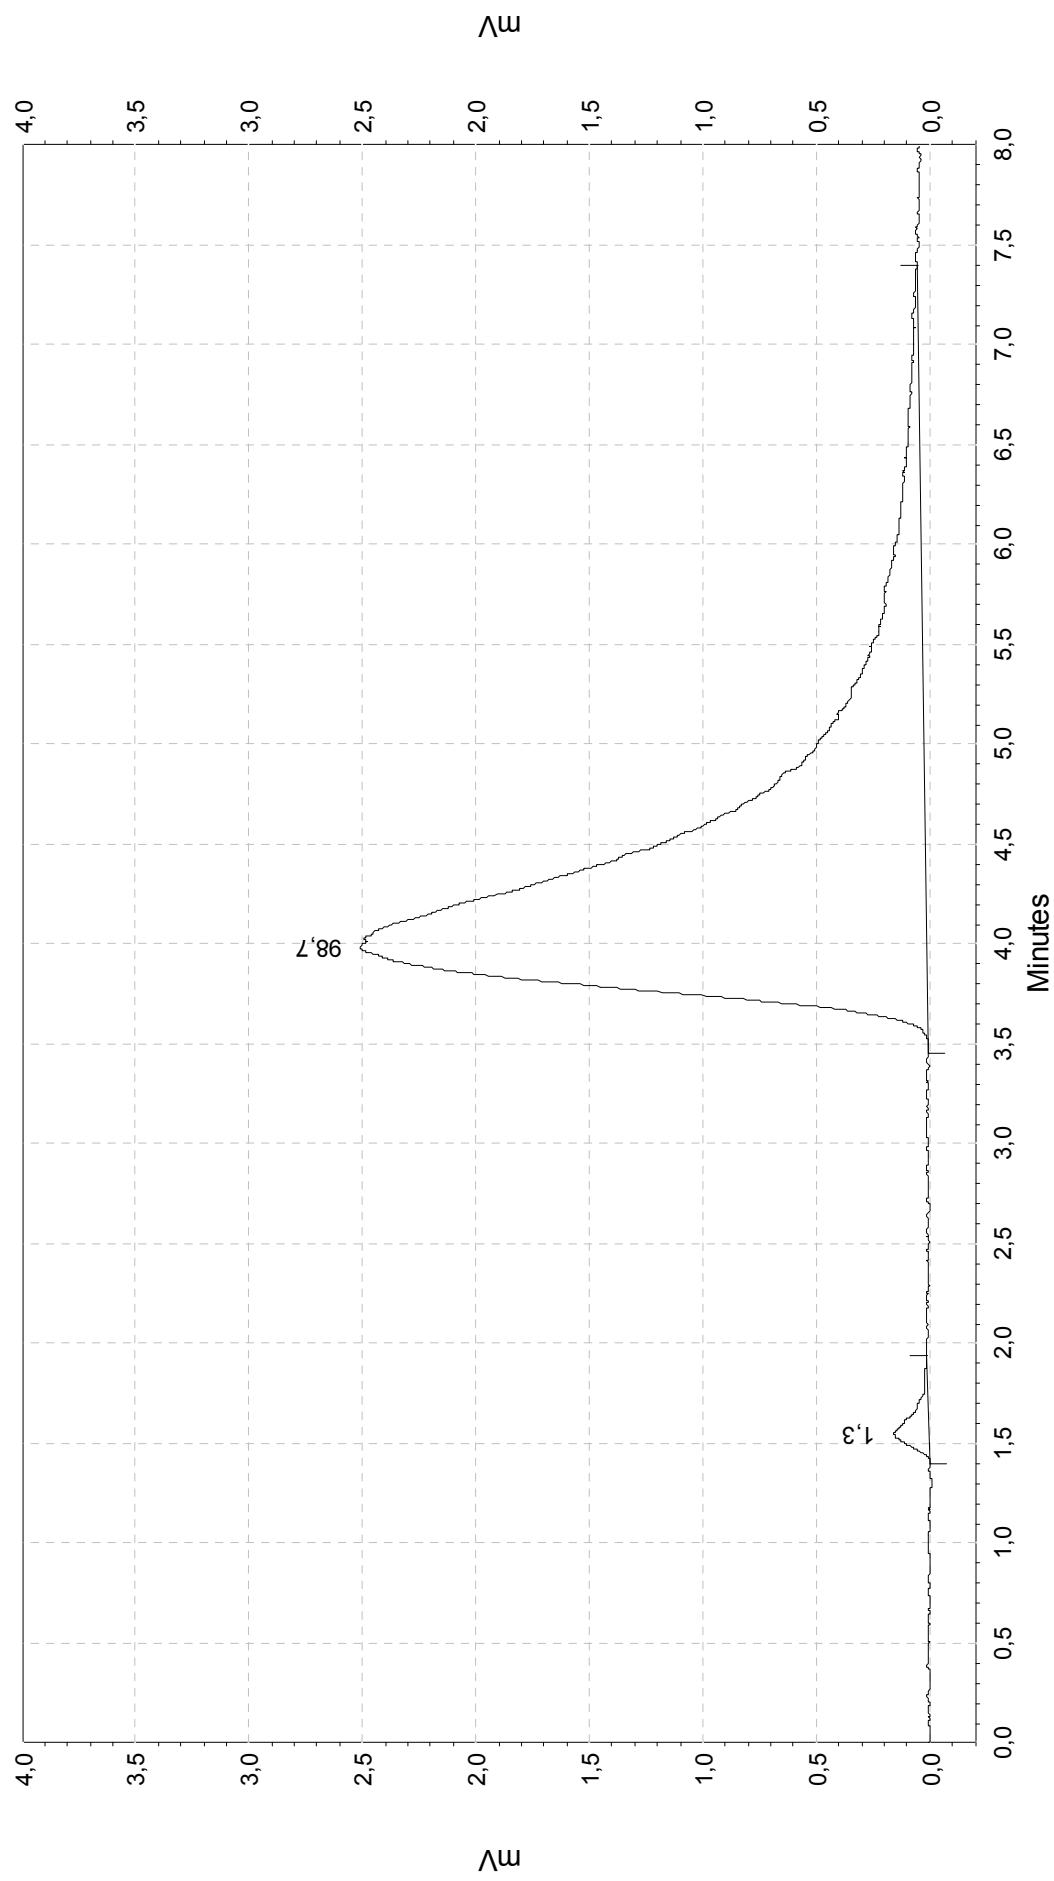

First measurement of three independent data for TPT in gel at 0.015% loading  
 $t = 270$  min

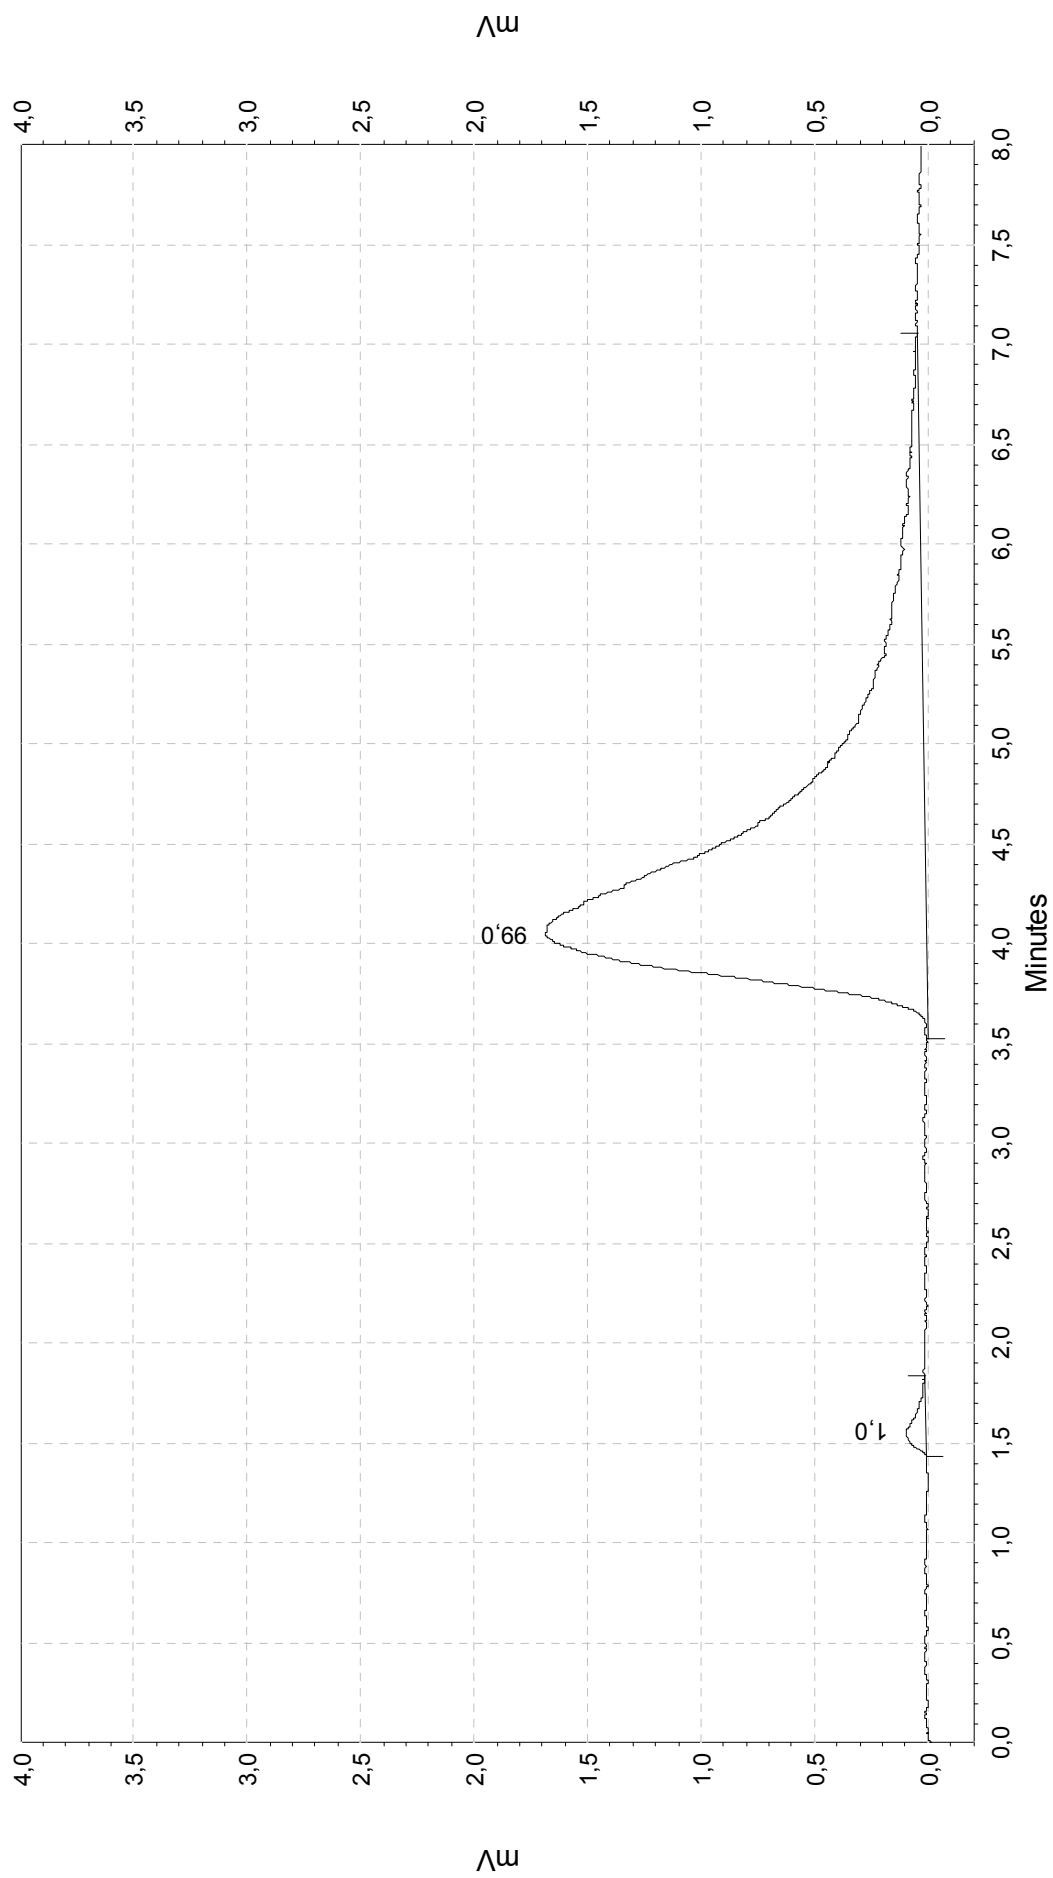

First measurement of three independent data for TPT in gel at 0.015% loading  
 $t = 315$  min

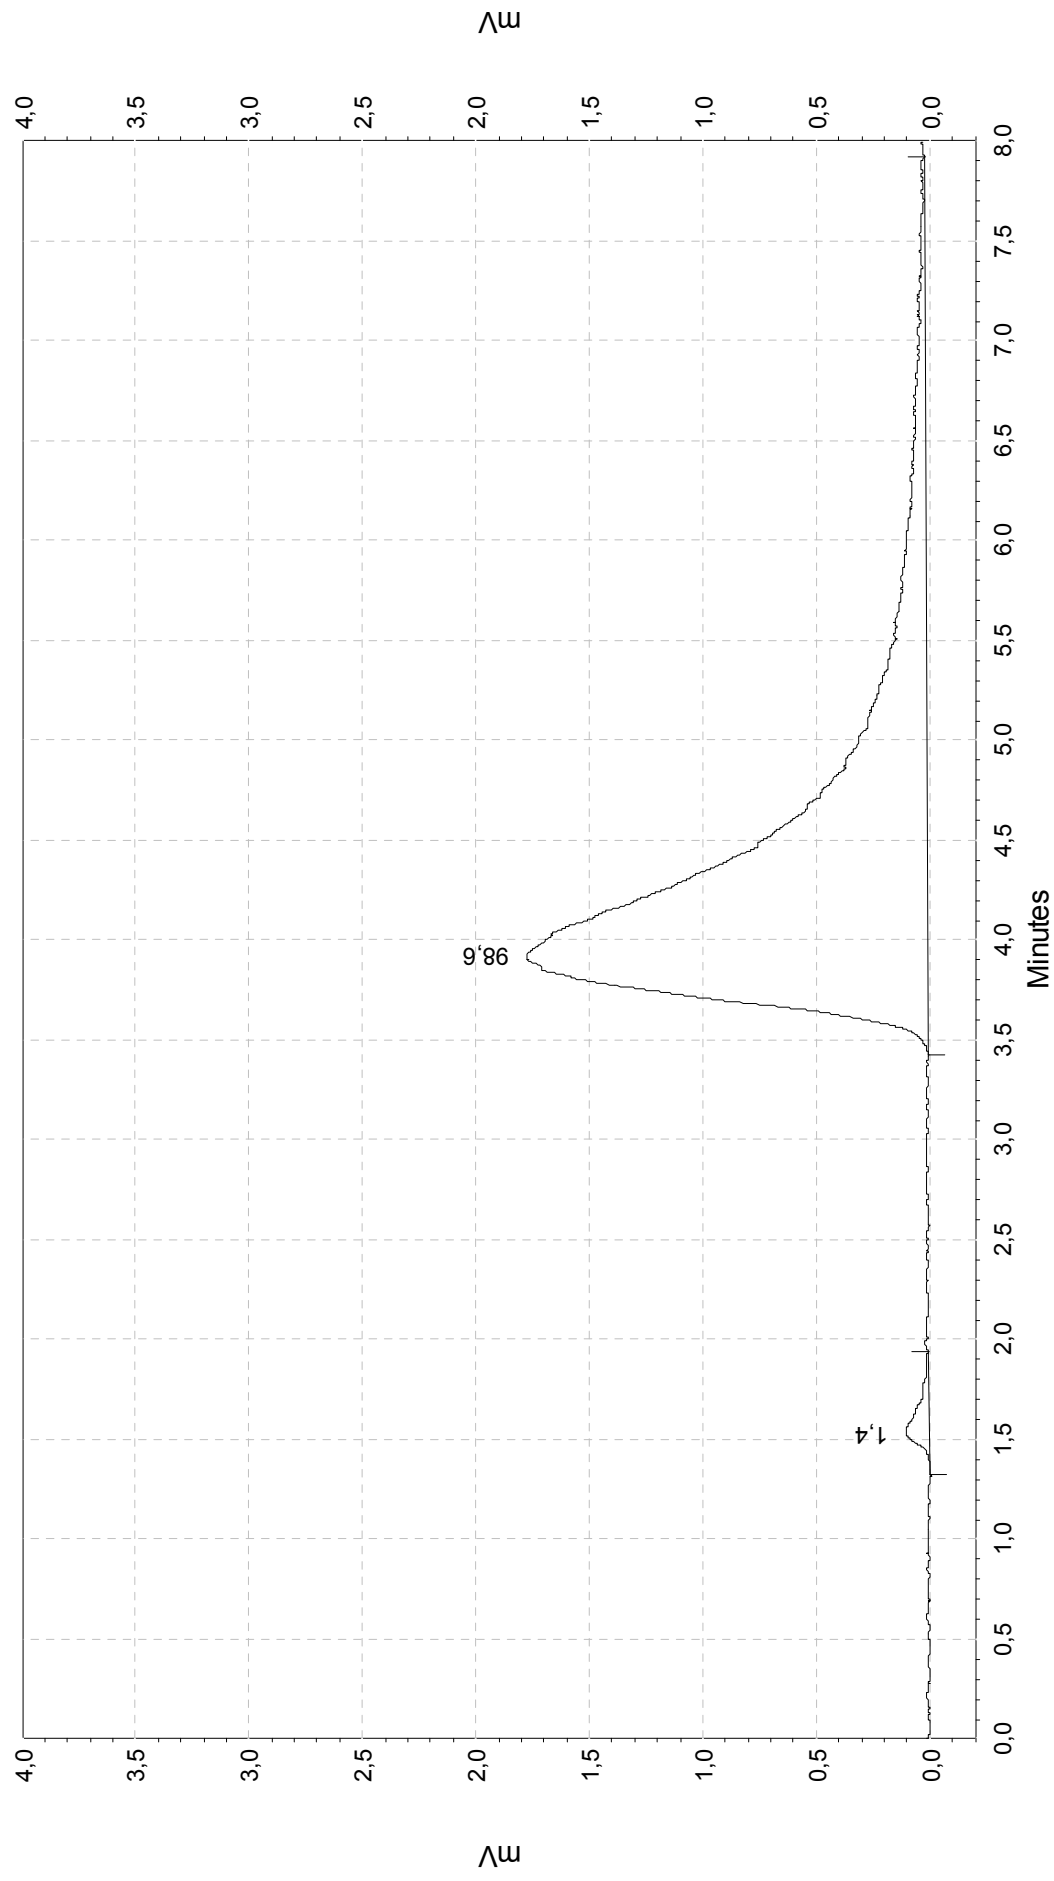



First measurement of three independent data for CPT in gel at 1.0% loading (representative example)  
 $t = 120$  min

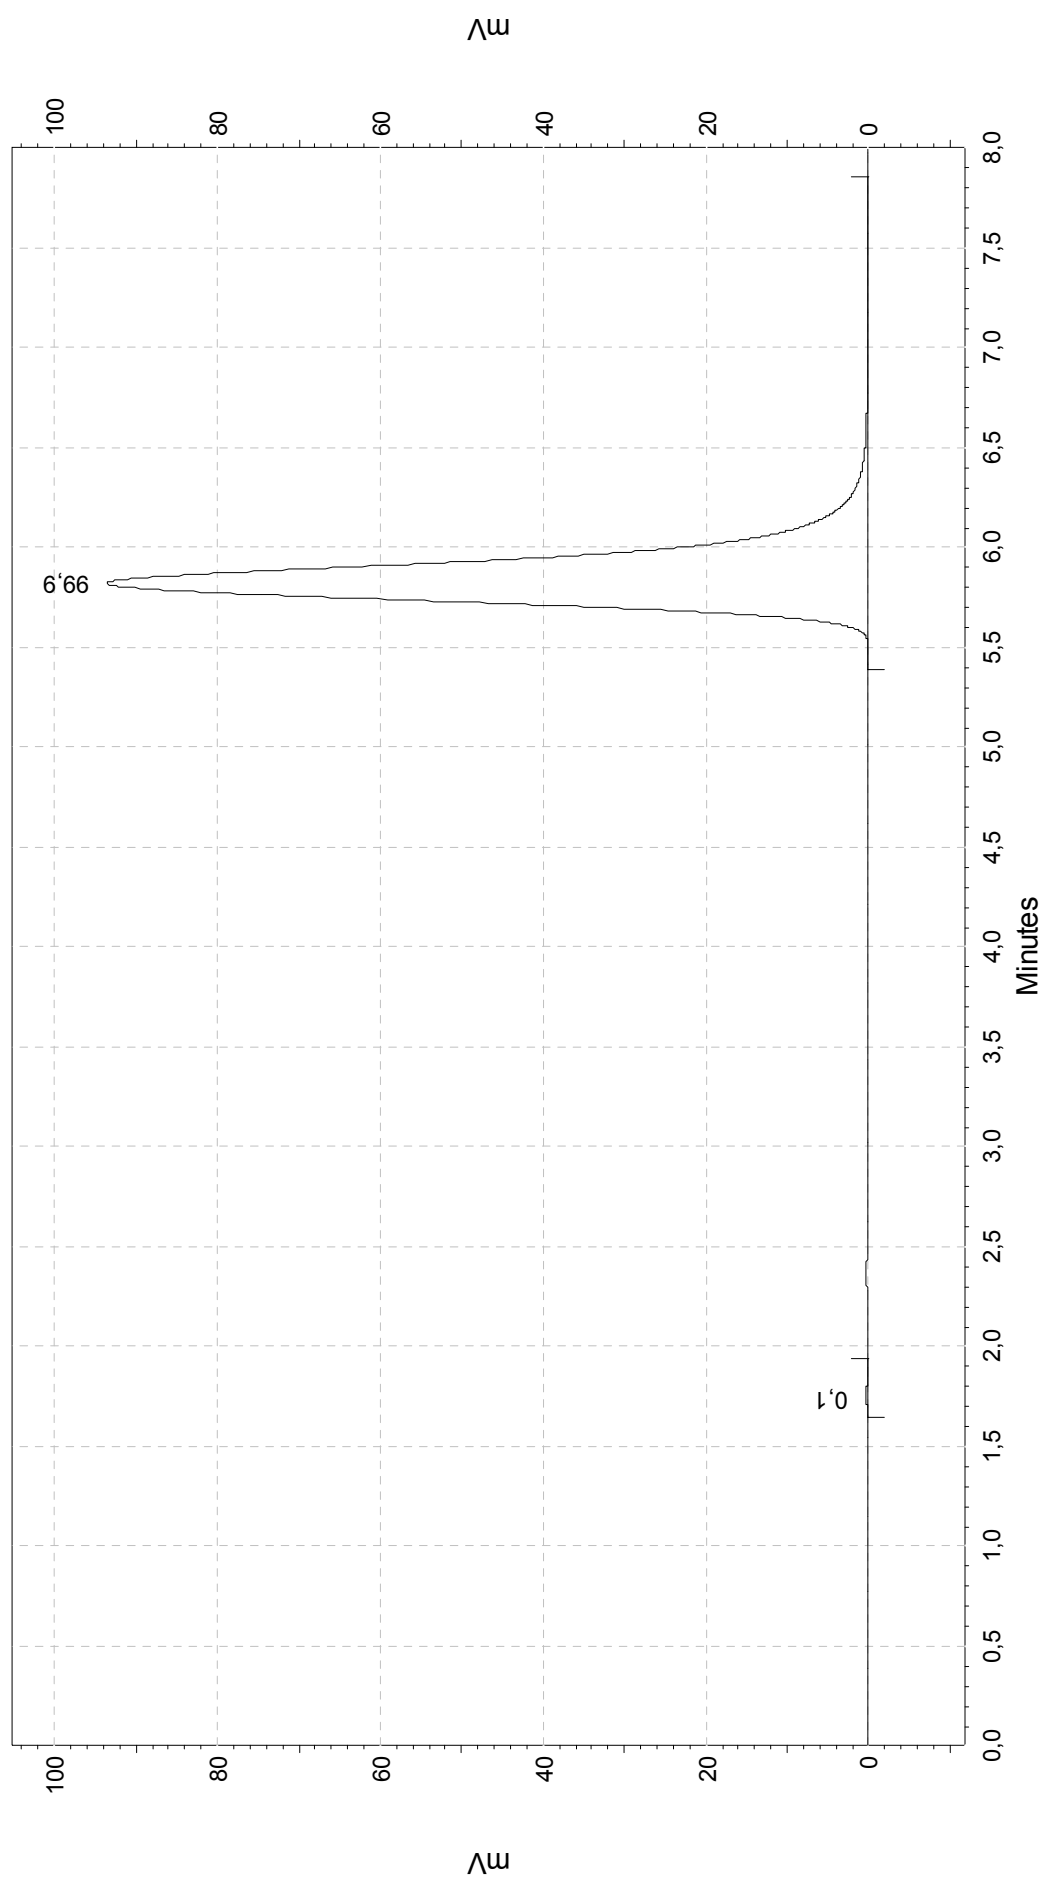

First measurement of three independent data for CPT in gel at 10.0% loading (representative example)  
 $t = 120$  min

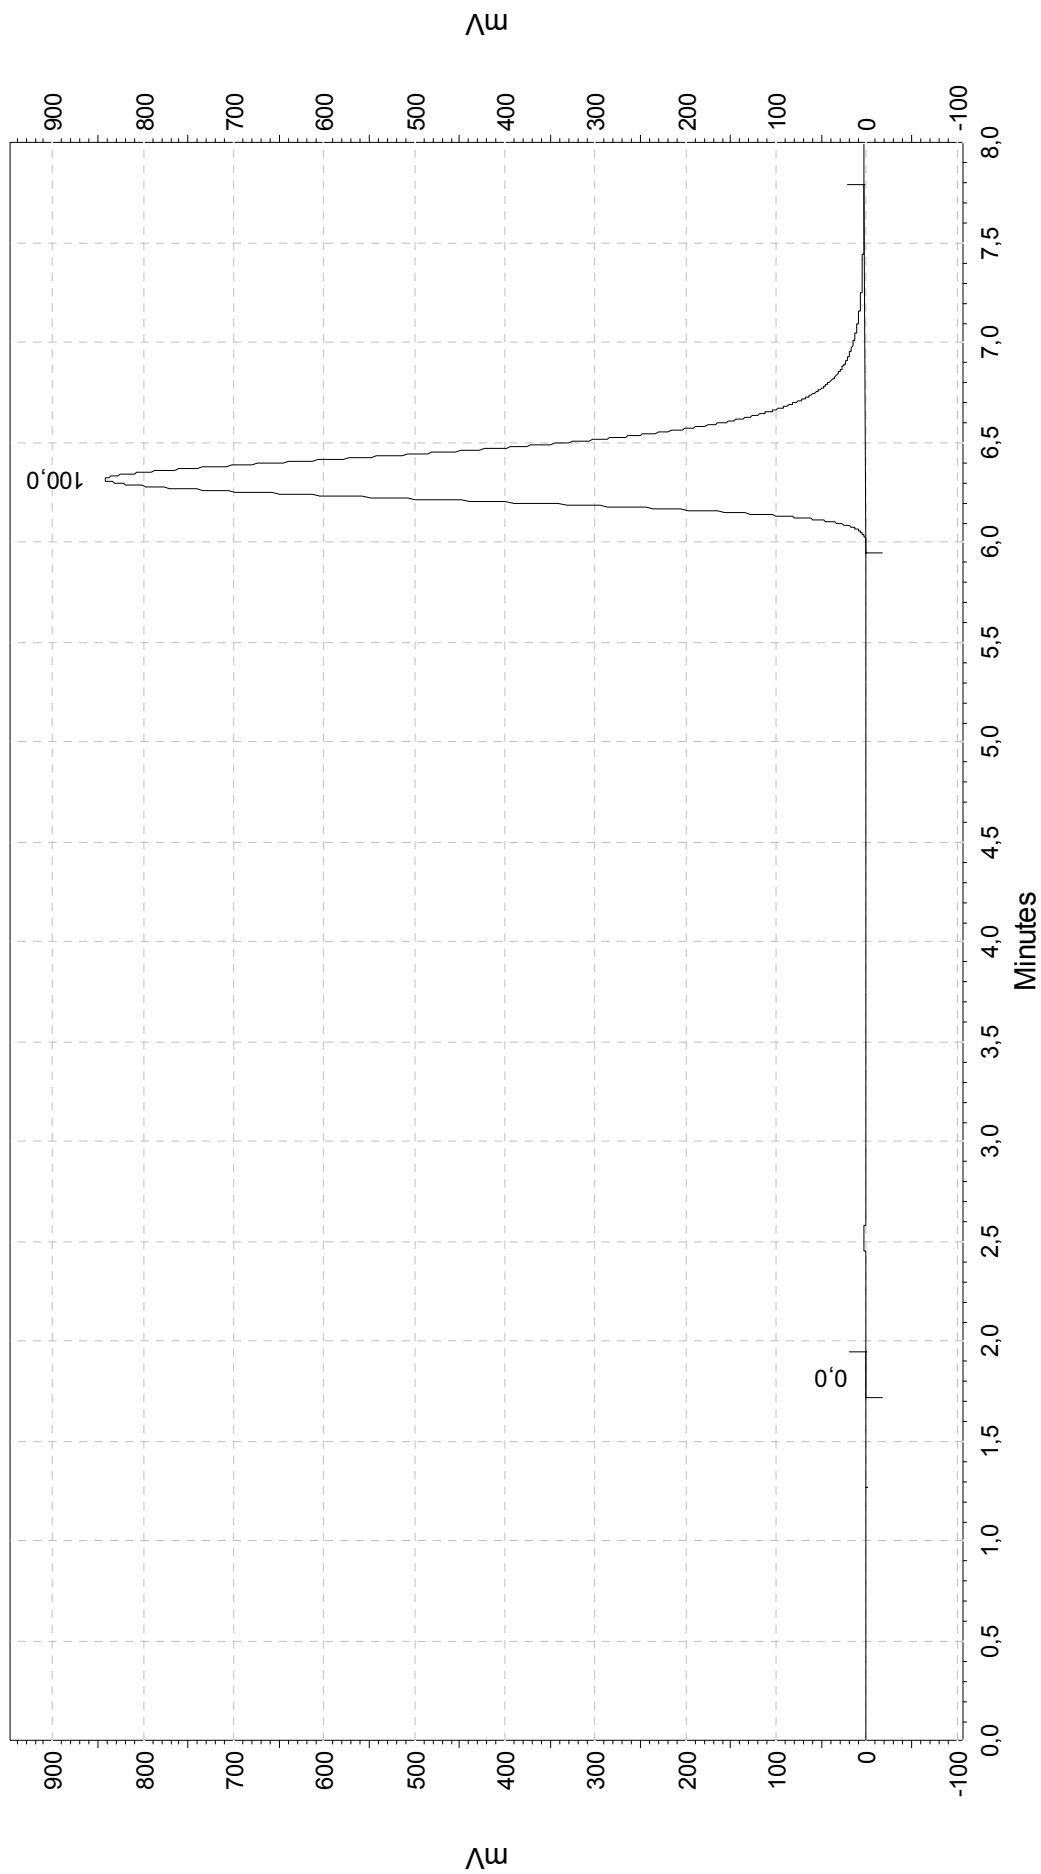

First measurement of three independent data for TPT in gel at 1.0% loading (representative example)  
 $t = 120$  min

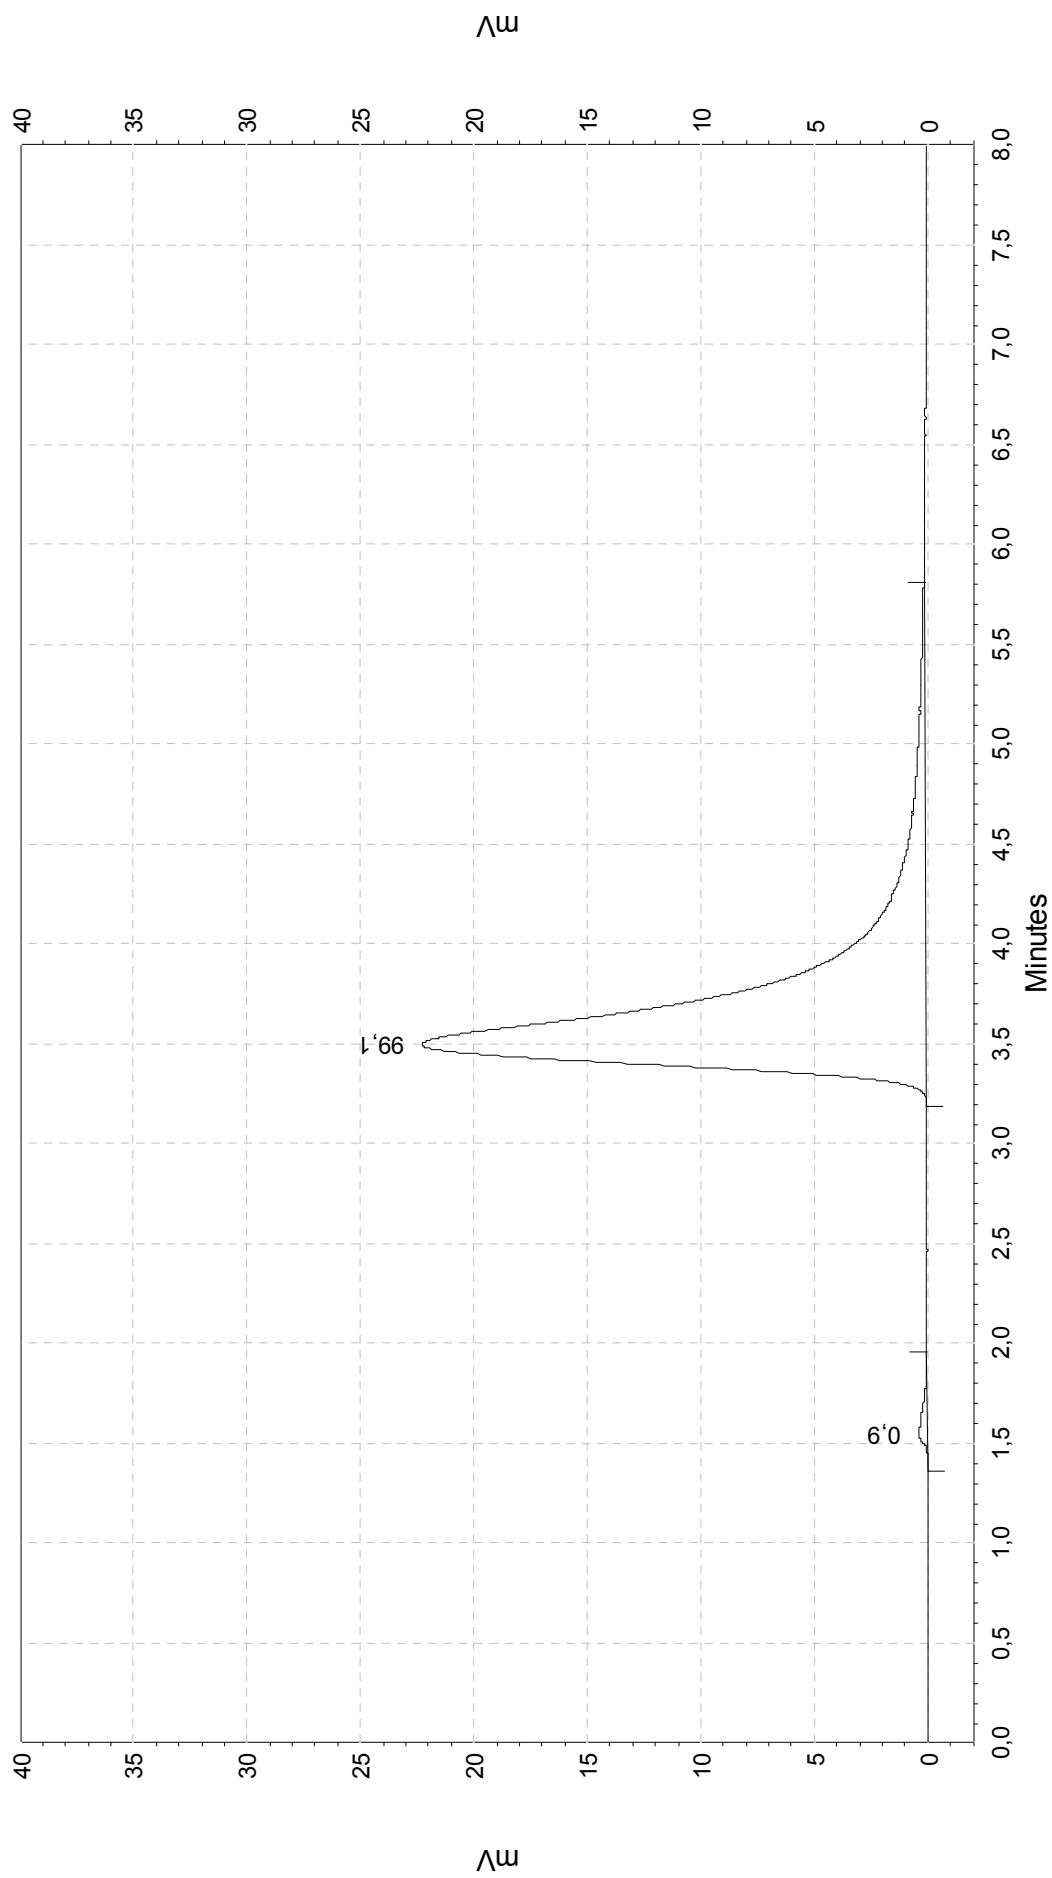

First measurement of three independent data for TPT in gel at 10.0% loading (representative example)  
t = 120 min

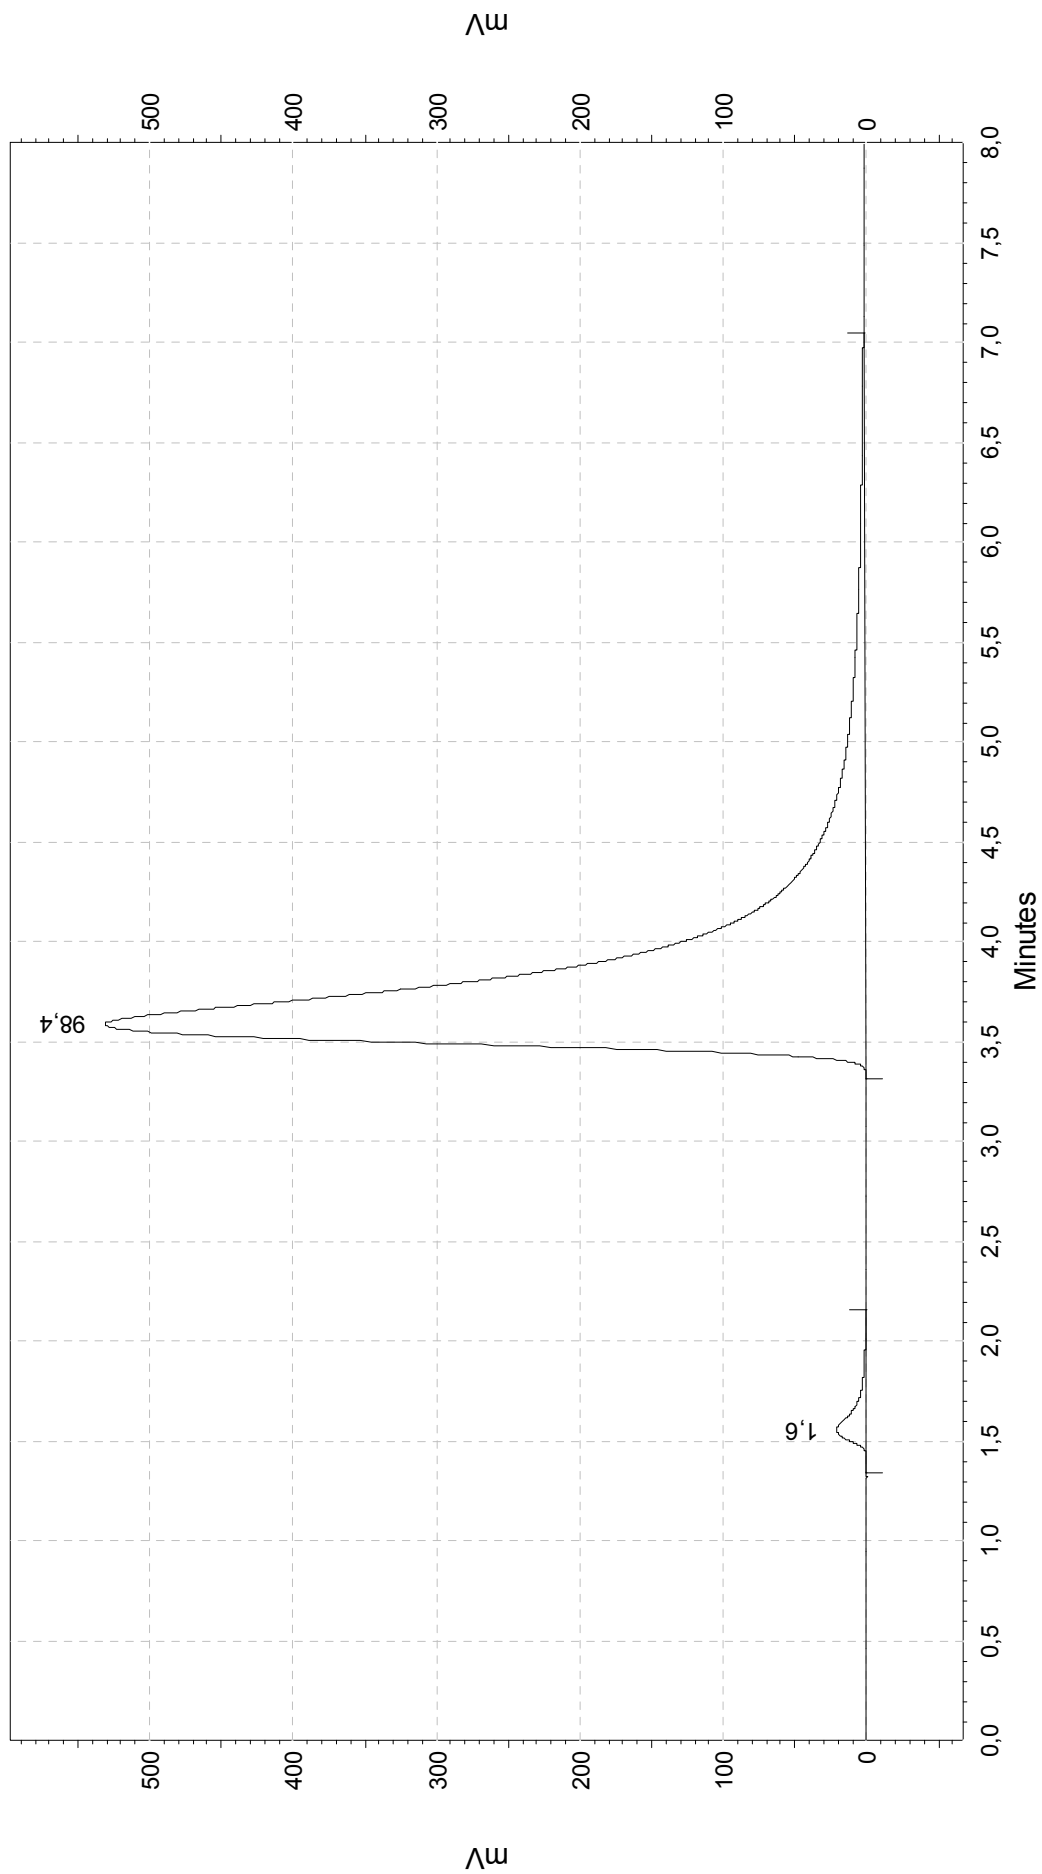

Copy of the  $^1\text{H}$  NMR spectra  
Copolymer 1

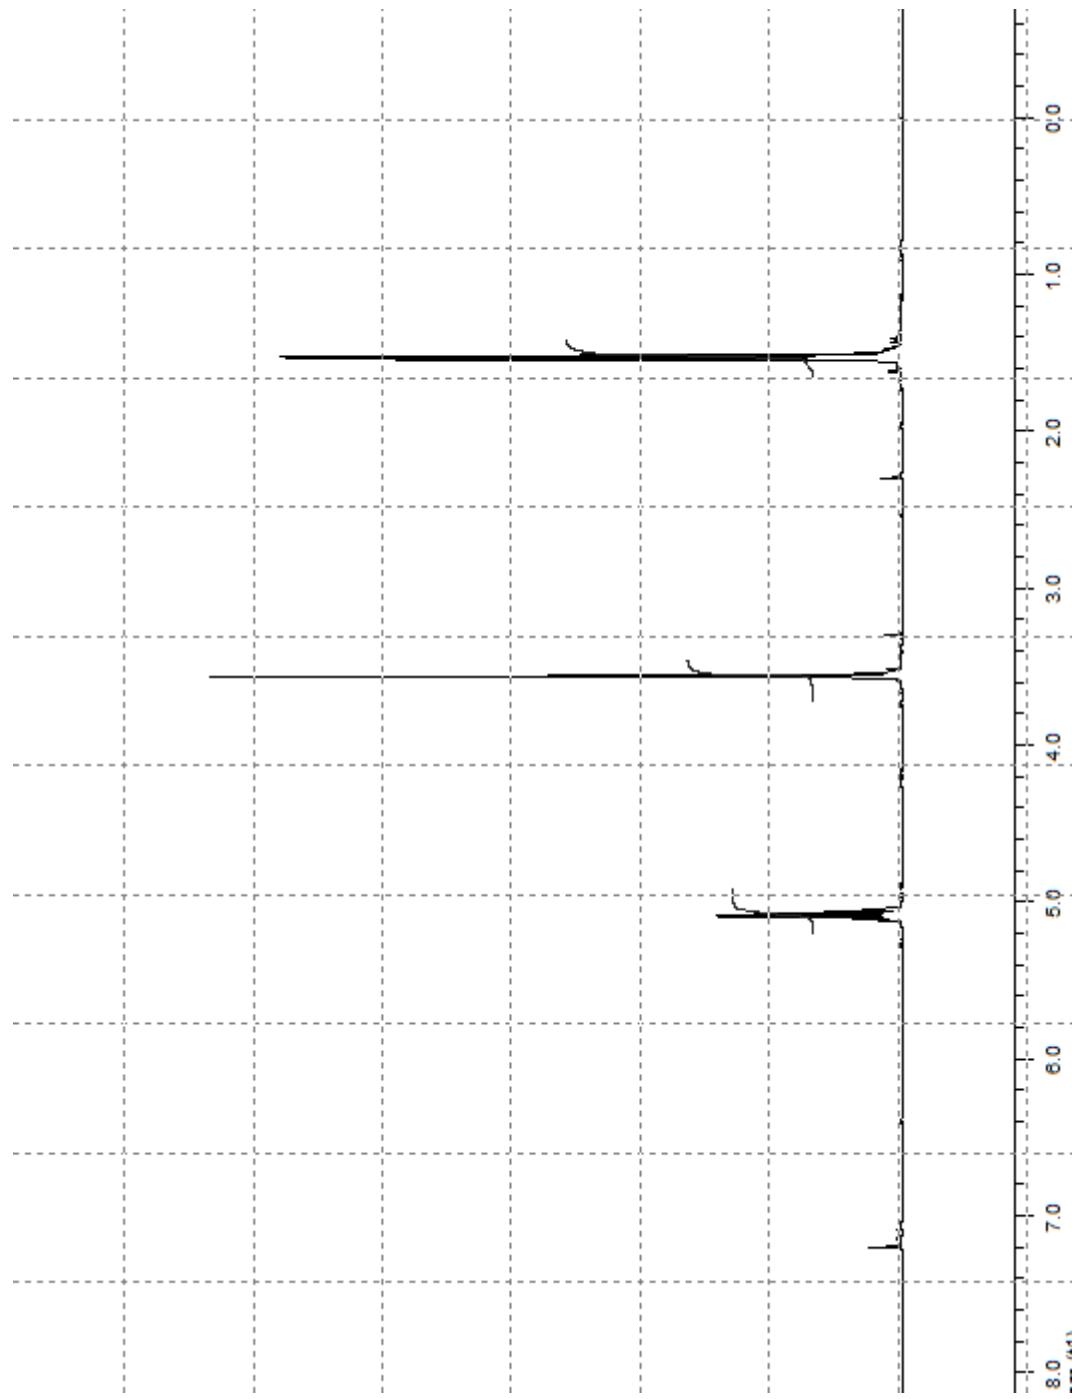

### Copolymer 2

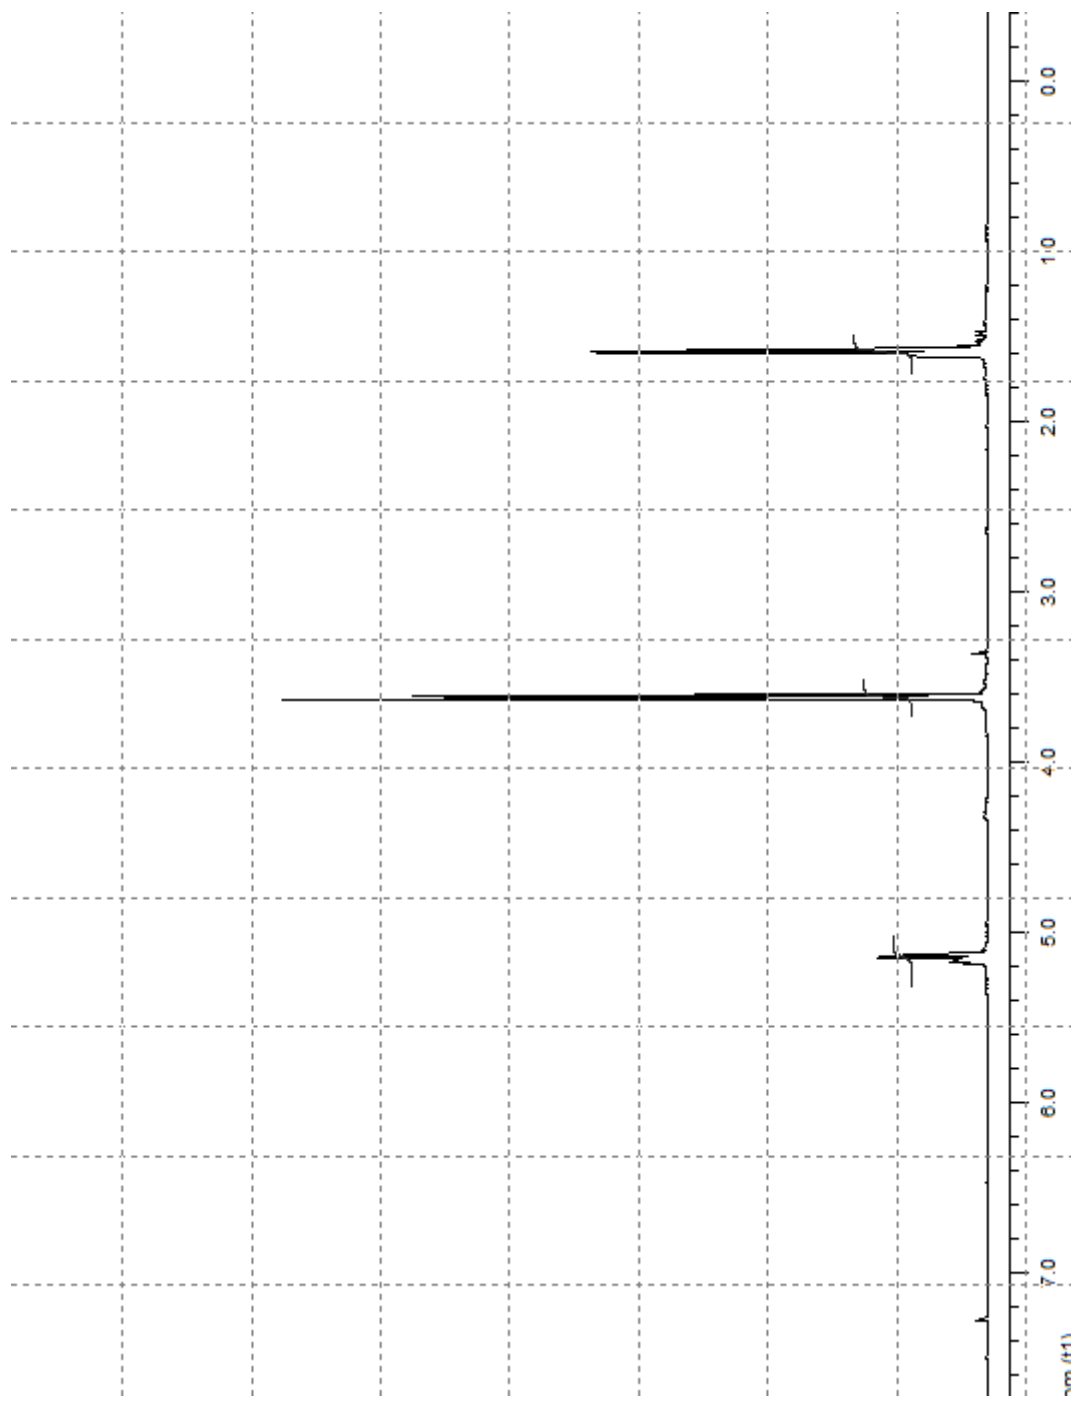

### Copolymer 3

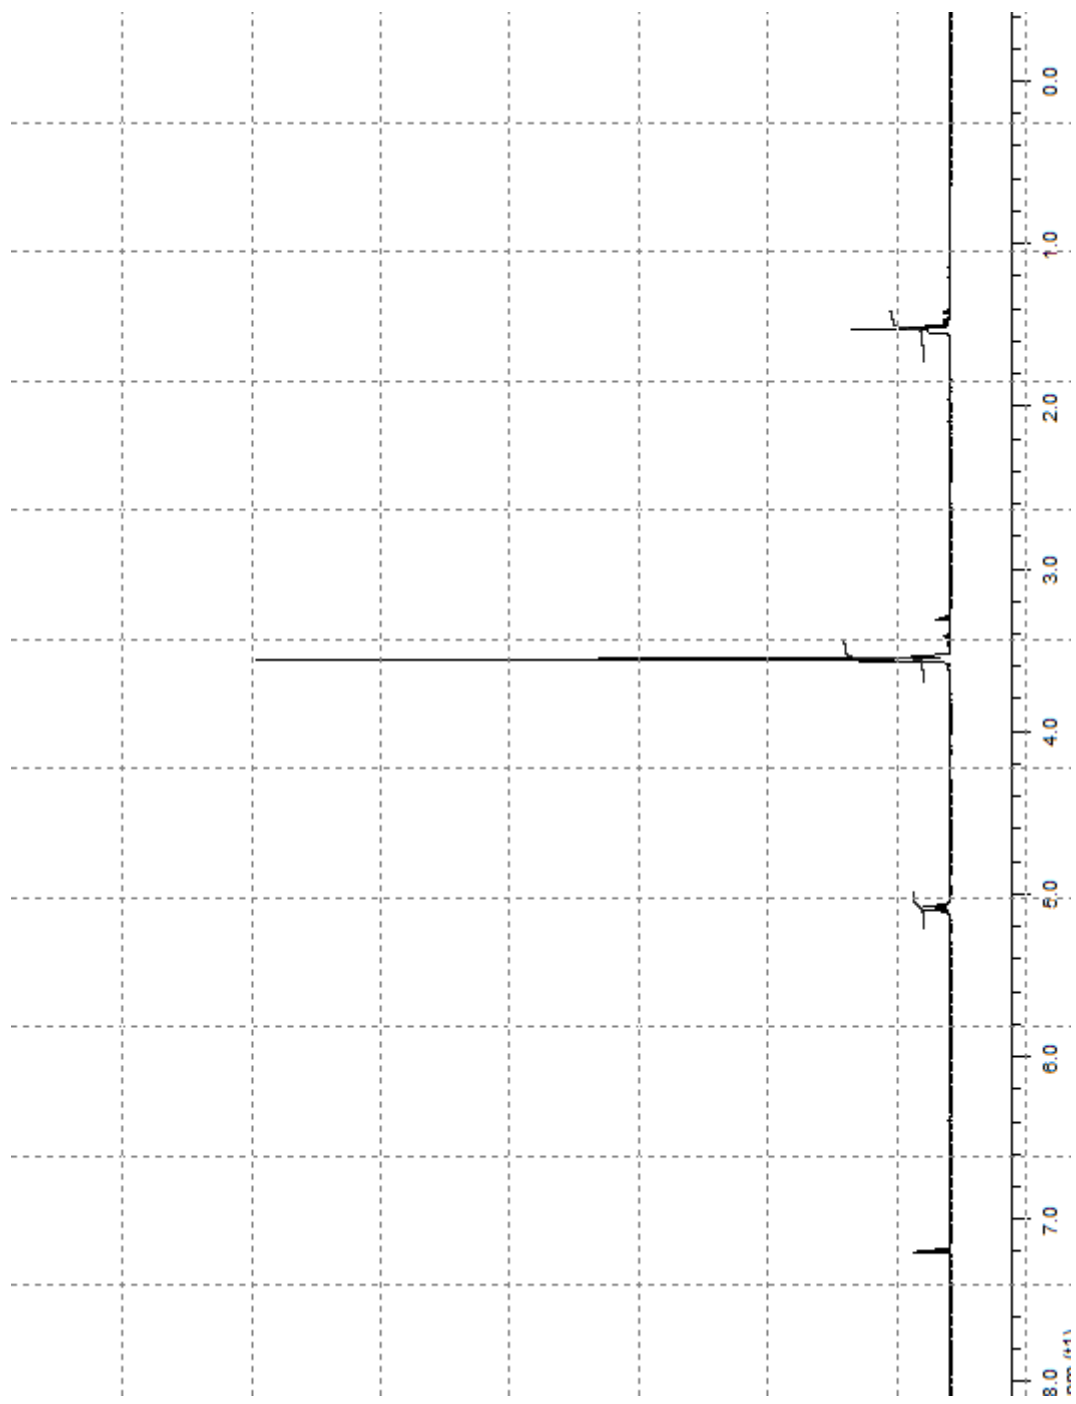

Supplement: c1ra00366f.pdf [file c1ra00366f.pdf]
